# Supplementary material for: Rh(iii)-Catalyzed [5 + 1] annulation of 2-alkenylanilides and 2-alkenylphenols with allenyl acetates
Source: Royal Society of Chemistry journal article supplement (doi:10.1039/d1sc06097j), 2022-01-01

## Rh(III)-Catalyzed [5+1] Annulation of 2-Alkenylanilides and 2-Alkenylphenols with Allenyl Acetates

Anurag Singh, Rahul K. Shukla, Chandra M. R. Volla.

Department of Chemistry, Indian Institute of Technology Bombay, Powai, Mumbai-400076, India

[Chandra.volla@chem.iitb.ac.in](mailto:Chandra.volla@chem.iitb.ac.in)

### Supporting Information

#### Contents :

|                                                                      |         |
|----------------------------------------------------------------------|---------|
| 1. General methods                                                   | S2      |
| 2. Preparation of 2-alkeny anilides and allenyl acetate              | S3      |
| 3. Optimization                                                      | S4-S5   |
| 4. General procedure A: Synthesis of 1,2-dihydroquinolin derivatives | S5      |
| 5. Spectroscopic data                                                | S6-S23  |
| 6. Functionalization                                                 | S24     |
| 7. Mechanistic studies                                               | S25-S28 |
| 8. References                                                        | S28     |
| 9. NMR spectra                                                       | S29     |

## 1. General information:

All reactions were performed in a 15 mL reaction tube. Unless otherwise noted, starting materials, reagents and solvents were purchased from common commercial sources and used without further purification. Starting materials were prepared according to the existing literature procedures.  $^1\text{H}$  NMR spectra were recorded at 400 MHz and 500 MHz using TMS as internal standard.  $^{13}\text{C}$  NMR spectra were recorded at 100 MHz and 125 MHz using TMS as internal standard. High resolution mass measurements were carried out using Micromass Q-ToF ESI instrument using direct inlet mode. Analytical thin-layer chromatography (TLC) was performed on pre-coated 0.2 mm thick Merck 60 F<sub>245</sub> silica plates and various combinations of ethyl acetate and petroleum ether were used as eluent. Visualization of spots of allene and final product was accomplished by subjecting to  $\text{KMnO}_4$  stain. All compounds were purified using silica gel (100-200 mesh) column chromatography and gave spectroscopic data consistent with being  $\geq 95\%$  the assigned structure.

## 2. General procedure for the synthesis of 2-alkenyl anilides.<sup>1,2</sup>

### Step 1:

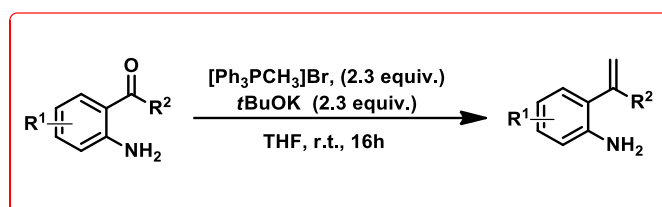

To a solution of methyltriphenylphosphonium bromide (2.04 g, 2.3 equiv) and potassium tert-butoxide (0.699 g, 2.3 equiv) in THF (26 mL) under Ar atmosphere was added the 2-aminoacetophenone derivative (0.50 g, 4.09 mmol). The reaction was heated at 30 °C and stirred for 12 hours and then cooled to room temperature. Solvents were removed in vacuo and the resulting mixture was extracted with diethyl ether. The combined organic layers were washed with brine, and dried over anhydrous sodium sulfate. Evaporation of the solvent followed by purification by flash chromatography on silica gel (hexanes:diethylether; 4:6) gave the 2-alkenyl aniline derivatives.

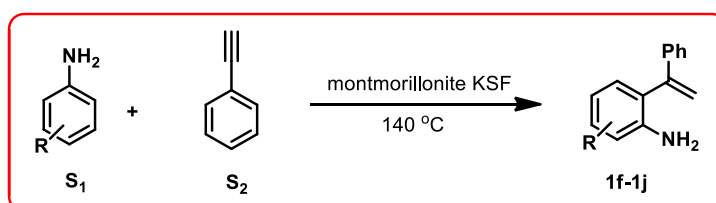

Aniline (5 mmol) A, phenylacetylene (0.51 g, 5 mmol) B and montmorillonite KSF S4 (0.51 g) are introduced in a round bottomed flask equipped with magnetic stirrer and a reflux condenser. The reaction mixture is heated at 140 °C for 5 hours and then cooled to room temperature. The products were dissolved with dichloromethane and filtered. Then the solvent was concentrated in vacuo and the crude was purified by column chromatography (silica gel, appropriate mixture of petroleum ether /ethyl acetate) to give corresponding 2-alkenyl aniline.

### Step 2:

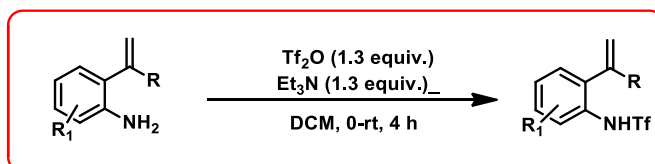

To a solution of *o*-isopropenylaniline (1 mL, 7.34 mmol) in dichloromethane (25 mL) under Ar atmosphere was added triethylamine (1.228 mL, 1.2 equiv) at 0 °C. Then trifluoromethanesulfonic anhydride (1.489 mL, 1.2 equiv) was added dropwise. The reaction was stirred at 0 °C for 1.5 hours and quenched with saturated NH<sub>4</sub>Cl aqueous solution. The resulting mixture was extracted with dichloromethane and dried over anhydrous sodium sulfate. Evaporation of the solvent followed by purification column flash chromatography on silica gel (hexanes:diethylether; 8:2) affording corresponding products.

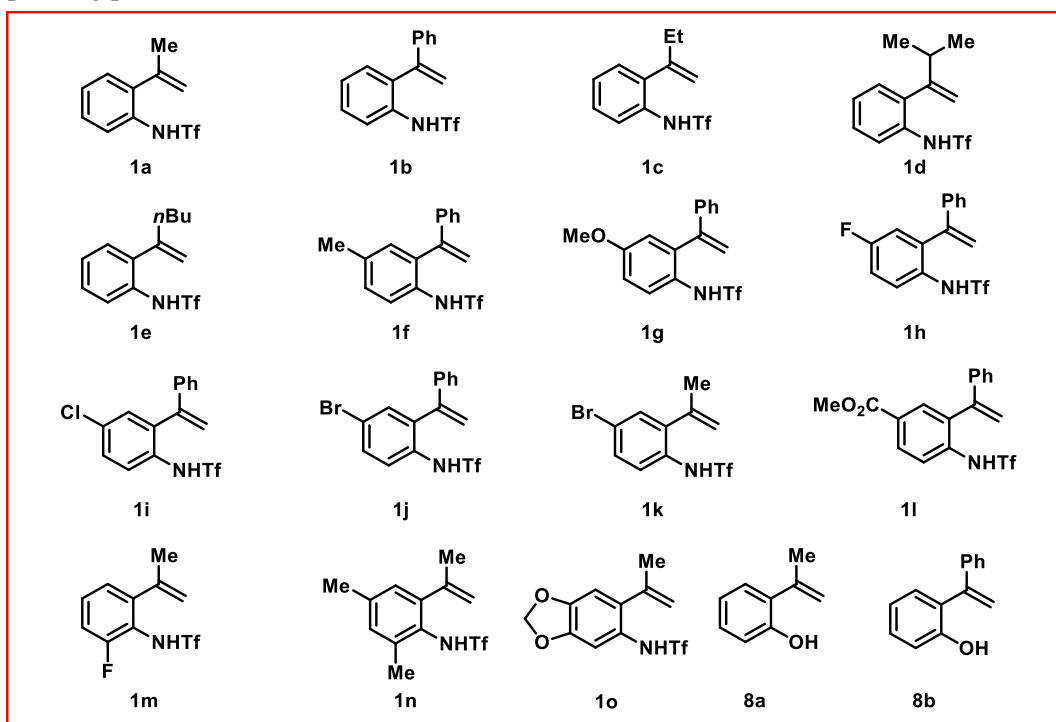

### General procedure for the synthesis of Allenyl Acetate.<sup>3,4</sup>

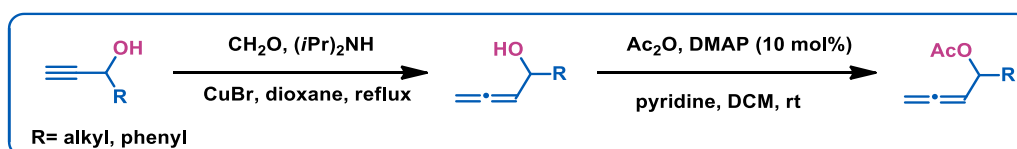

#### Step 1:

To a two-necked round bottom-flask equipped with a magnetic stir bar were added under argon propargylic alcohol (10 mmol), 15 mL dioxane, 0.72 g of cuprous bromide, 0.74 g of paraformaldehyde, and 1.85 g of diisopropylamine. The reaction mixture was refluxed for 2 h and then cooled to room temperature. To mixture was filtered through a Celite plug. The filtrate is diluted with water followed by diethyl ether and acidified with 6 N HCl to pH 2. The organic layer was separated and the aqueous phase was extracted with diethyl ether for additional two times. The organic phase was then washed with saturated NaHCO<sub>3</sub>, brine and dried over MgSO<sub>4</sub>. After filtration and evaporation under reduced pressure, the residue was subjected directly for the next step.

Step 2: To a round bottom-flask equipped with a magnetic stir bar were added under argon allenyl carbinol, DMAP (122 mg, 1.0 mmol, 0.2 equiv), pyridine (790 mg, 10 mmol, 2.0 equiv) and dichloromethane (0.3 M). The mixture was cooled to 0 °C and the chloro methyl formate (708.8 mg, 7.5 mmol, 1.5 equiv) was slowly added. The reaction was allowed to stir at room temperature until completion (typically 1 – 16 h). The mixture was diluted with dichloromethane and washed successively with 1 N HCl, saturated NaHCO<sub>3</sub>, and brine. The organic phase was dried over MgSO<sub>4</sub>, filtered and evaporated under reduced pressure. The residue was purified by flash column chromatography to yield the desired product.

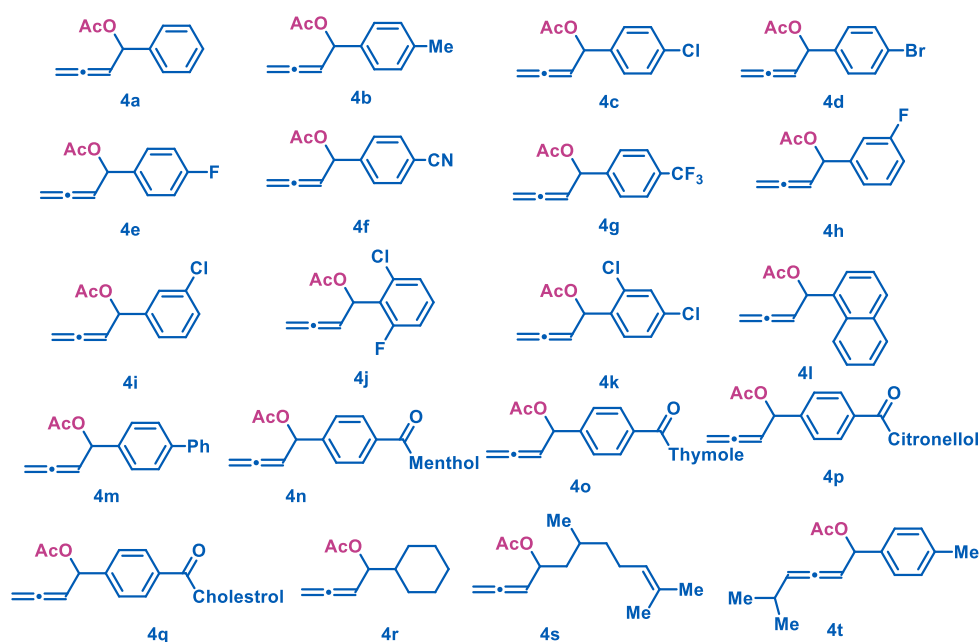

### 3. Optimization of reaction condition:

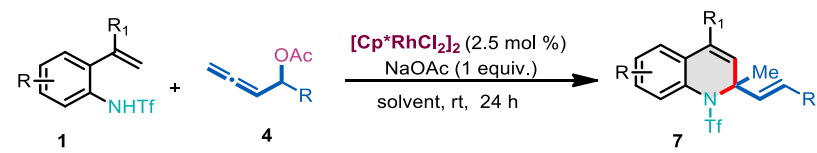

To achieve further enhancement in yield, different solvents were screened. DCE proved to be best solvent for developed protocol delivering the product **7a** in 93% yield, while other solvents like toluene, 1,4 dioxane, MeOH and DMF were found less efficient hence lowered yield were observed (entry 3-6). The presence of other additives like Cu(OAc)<sub>2</sub>, CsOAc and AgOAc did not exhibit any significant improvement in reaction yield (entry 7-9). Surprisingly, silver salts like AgSbF<sub>6</sub> and AgBF<sub>4</sub>, having non-coordinating counter anions which are known to enhance the reactivity of the Rh(III)-catalyst, gave the product **3a** only in 70% and 68%, respectively (entries 10 and 11). After carefully examination of optimization, we found that loading of NaOAc could be further lower down to 30 mol% in DCE solvent (entry 12). In the absence of NaOAc, diminished yield of **7a** (20%) was observed (entry 11). When reaction was also carried out at elevated temperature at 70 °C, formation of **7a** was noticed within 20 minute with 86% yield (entry 12). Other metal catalyst like Pd(OAc)<sub>2</sub>, [Cp\*Co(CO)I<sub>2</sub>], [Cp\*IrCl<sub>2</sub>]<sub>2</sub> and [Ru(p-cymene)Cl<sub>2</sub>]<sub>2</sub> were found completely ineffective when used instead of Rh(III) (entry 13). Absence of Rh catalyst did not furnish the cyclized product (entry 14).

| entry | catalyst | solvent | base | yield (%) |
|-------|----------|---------|------|-----------|
|-------|----------|---------|------|-----------|

|    |                                                      |                    |                      |                        |
|----|------------------------------------------------------|--------------------|----------------------|------------------------|
| 1  | [Cp*RhCl <sub>2</sub> ] <sub>2</sub>                 | CH <sub>3</sub> CN | NaOAc                | 45 (42) <sup>[b]</sup> |
| 2  | [Cp*RhCl <sub>2</sub> ] <sub>2</sub>                 | DCE                | NaOAc                | 93 (89)                |
| 3  | [Cp*RhCl <sub>2</sub> ] <sub>2</sub>                 | Toluene            | NaOAc                | 75                     |
| 4  | [Cp*RhCl <sub>2</sub> ] <sub>2</sub>                 | 1,4-dioxane        | NaOAc                | 25                     |
| 5  | [Cp*RhCl <sub>2</sub> ] <sub>2</sub>                 | MeOH               | NaOAc                | 64                     |
| 6  | [Cp*RhCl <sub>2</sub> ] <sub>2</sub>                 | DMF                | NaOAc                | 43                     |
| 7  | [Cp*RhCl <sub>2</sub> ] <sub>2</sub>                 | DCE                | Cu(OAc) <sub>2</sub> | 73                     |
| 8  | [Cp*RhCl <sub>2</sub> ] <sub>2</sub>                 | DCE                | CsOAc                | 68                     |
| 9  | [Cp*RhCl <sub>2</sub> ] <sub>2</sub>                 | DCE                | AgOAc                | 68                     |
| 10 | [Cp*RhCl <sub>2</sub> ] <sub>2</sub>                 | DCE                | AgSbF <sub>6</sub>   | 70                     |
| 11 | [Cp*RhCl <sub>2</sub> ] <sub>2</sub>                 | DCE                | AgBF <sub>4</sub>    | 68                     |
| 12 | [Cp*RhCl <sub>2</sub> ] <sub>2</sub>                 | DCE                | NaOAc                | 91 <sup>[c]</sup>      |
| 13 | [Cp*RhCl <sub>2</sub> ] <sub>2</sub>                 | DCE                | -                    | 10                     |
| 14 | [Cp*RhCl <sub>2</sub> ] <sub>2</sub>                 | DCE                | NaOAc                | 87 <sup>[d]</sup>      |
| 15 | [Ru( <i>p</i> -cymene)Cl <sub>2</sub> ] <sub>2</sub> | DCE                | NaOAc                | -                      |
| 16 | Pd(OAc) <sub>2</sub>                                 | DCE                | NaOAc                | -                      |
| 17 | [Cp*IrCl <sub>2</sub> ] <sub>2</sub>                 | DCE                | NaOAc                | -                      |
| 18 | [Cp*Co(CO)I <sub>2</sub> ] <sub>2</sub>              | DCE                | NaOAc                | -                      |
| 17 | -                                                    | DCE                | NaOAc                | -                      |

<sup>a</sup> Reaction condition: **1a** (0.2 mmol), **2a** (0.18 mmol), solvent 2 ml, 36 h. [b] isolated yield. [c] Used 30 mol % NaOAc. [d] T= 70 °C.

### 3. General procedure for Rh(III) -catalyzed [5+1] annulation of *o*-alkenylanilides with allenic acetates.

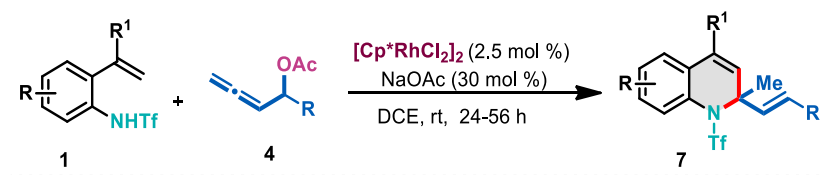

A sealed tube containing [Cp\*RhCl<sub>2</sub>]<sub>2</sub> (2.5 mol %), NaOAc (30 mol %) was evacuated and purged with nitrogen gas three times. Then, *o*-alkenylanilides **1** (0.20 mmol) and allenic acetate **4** (0.18 mmol) in CH<sub>3</sub>CN (2 ml) were added via syringe under nitrogen atmosphere and the reaction mixture was allowed to stir at r.t. for 24 h. Then, the mixture was diluted with CH<sub>2</sub>Cl<sub>2</sub> (10 mL). The mixture was filtered through a celite pad and washed with CH<sub>2</sub>Cl<sub>2</sub> (3 × 10 mL). The filtrate was concentrated under reduced

pressure. The residue was purified by silica gel column chromatography using hexane/ethyl acetate as eluent to afford the desired annulated pure product **7**.

#### 4. Spectroscopic data:

##### *(E)*-2,4-dimethyl-2-styryl-1-((trifluoromethyl)sulfonyl)-1,2-dihydroquinoline

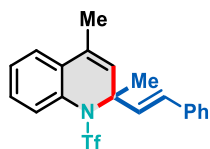

**7a**, 91%

64.4 mg, 91%, colorless liquid;

$^1\text{H NMR}$  (500 MHz,  $\text{CDCl}_3$ )  $\delta$  7.61 – 7.53 (m, 1H), 7.35 (dd,  $J = 7.4, 1.9$  Hz, 1H), 7.32 – 7.27 (m, 4H), 7.27 – 7.22 (m, 3H), 6.44 (d,  $J = 15.9$  Hz, 1H), 6.17 (d,  $J = 15.9$  Hz, 1H), 5.97 (s, 1H), 2.25 (d,  $J = 1.4$  Hz, 3H), 1.88 (s, 3H).

$^{13}\text{C}\{^1\text{H}\}$  NMR (125 MHz,  $\text{CDCl}_3$ )  $\delta$  136.16, 134.27, 132.87, 132.17, 131.27, 130.68, 129.61, 128.55, 128.06, 127.93, 127.89, 127.72, 126.59, 123.09, 120.45 (q,  $J = 325.9$  Hz), 64.29, 26.56, 17.95.

**HRMS** (ESI-TOF)  $m/z$   $[\text{M} + \text{Na}]^+$  calcd for  $\text{C}_{20}\text{H}_{18}\text{F}_3\text{NNaO}_2\text{S}$  416.0903, found 416.0907.

##### *(E)*-4-ethyl-2-methyl-2-styryl-1-((trifluoromethyl)sulfonyl)-1,2-dihydroquinoline

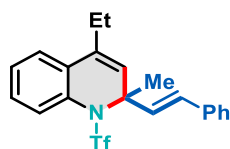

**7b**, 81%

59.407 mg, 81%, colorless liquid;

$^1\text{H NMR}$  (400 MHz,  $\text{CDCl}_3$ )  $\delta$  7.55 (dd,  $J = 7.6, 1.5$  Hz, 1H), 7.35 – 7.31 (m, 1H), 7.29 – 7.18 (m, 7H), 6.39 (d,  $J = 15.9$  Hz, 1H), 6.12 (d,  $J = 15.9$  Hz, 1H), 5.97 – 5.85 (m, 1H), 2.62 (q,  $J = 7.4$  Hz, 2H), 1.86 (s, 3H), 1.23 (q,  $J = 7.2$  Hz, 3H).

$^{13}\text{C}\{^1\text{H}\}$  NMR (100 MHz,  $\text{CDCl}_3$ )  $\delta$  138.47, 136.16, 134.57, 131.45, 131.33, 129.60, 129.20, 128.52, 128.32, 127.90, 127.74, 127.70, 126.57, 122.85, 121.96, 120.45 (q,  $J = 326.1$  Hz) 26.63, 24.45, 12.56.

**HRMS** (ESI-TOF)  $m/z$   $[\text{M} + \text{Na}]^+$  calcd for  $\text{C}_{21}\text{H}_{20}\text{F}_3\text{NNaO}_2\text{S}$  430.1059, found 430.1063.

##### *(E)*-4-isopropyl-2-methyl-2-styryl-1-((trifluoromethyl)sulfonyl)-1,2-dihydroquinoline

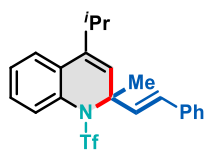

**7c**, 78%

57.5 mg, 78%, sticky brown solid.

**<sup>1</sup>H NMR** (400 MHz, CDCl<sub>3</sub>) δ 7.54 (d, *J* = 7.7 Hz, 1H), 7.36 (d, *J* = 9.2 Hz, 1H), 7.28 – 7.25 (m, 2H), 7.25 – 7.19 (m, 3H), 7.19 – 7.15 (m, 2H), 6.33 (d, *J* = 15.9 Hz, 1H), 6.08 (d, *J* = 15.9 Hz, 1H), 5.85 (s, 1H), 3.12 – 2.99 (sept, *J* = 6.7 Hz, 1H), 1.86 (s, 3H), 1.31 (d, *J* = 6.7 Hz, 3H), 1.16 (d, *J* = 6.9 Hz, 3H).

**<sup>13</sup>C{<sup>1</sup>H} NMR** (100 MHz, CDCl<sub>3</sub>) δ 142.92, 136.12, 134.70, 131.45, 131.41, 129.55, 128.51, 128.47, 127.89, 127.84, 127.66, 127.61, 126.55, 122.83, 120.45 (*q*, *J* = 325.3 Hz), 64.26, 27.96, 26.70, 22.09, 21.40.

**HRMS** (ESI-TOF) *m/z* [M + H]<sup>+</sup> calcd for C<sub>22</sub>H<sub>23</sub>F<sub>3</sub>NO<sub>2</sub>S 422.1396, found 422.1392.

*(E)*-4-butyl-2-methyl-2-styryl-1-((trifluoromethyl)sulfonyl)-1,2-dihydroquinoline

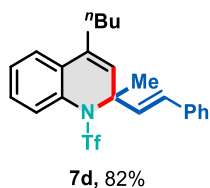

64.5 mg, 82%, Brown sticky solid.

**<sup>1</sup>H NMR** (400 MHz, CDCl<sub>3</sub>) δ 7.54 (d, *J* = 7.8 Hz, 1H), 7.32 (d, *J* = 7.3 Hz, 1H), 7.29 – 7.17 (m, 7H), 6.38 (d, *J* = 15.9 Hz, 1H), 6.12 (d, *J* = 15.9 Hz, 1H), 5.90 (s, 1H), 2.67 – 2.46 (m, 2H), 1.85 (s, 3H), 1.62 – 1.44 (m, 4H), 1.00 (t, *J* = 7.1 Hz, 3H).

**<sup>13</sup>C{<sup>1</sup>H} NMR** (100 MHz, CDCl<sub>3</sub>) δ 137.29, 136.15, 134.57, 131.51, 131.31, 129.87, 129.59, 128.53, 128.26, 127.90, 127.72, 127.65, 126.57, 122.97, 120.45 (*q*, *J* = 325.8 Hz), 64.27, 31.32, 30.44, 26.60, 22.80, 13.95.

**HRMS** (ESI-TOF) *m/z* [M + H]<sup>+</sup> calcd for C<sub>23</sub>H<sub>25</sub>F<sub>3</sub>NO<sub>2</sub>S 436.1553, found 436.1548.

*(E)*-2-methyl-4-phenyl-2-styryl-1-((trifluoromethyl)sulfonyl)-1,2-dihydroquinoline

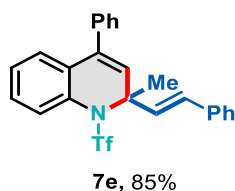

69.9 mg, 85%, colorless liquid;

**<sup>1</sup>H NMR** (500 MHz, CDCl<sub>3</sub>) δ 7.64 (d, *J* = 8.0 Hz, 1H), 7.53 – 7.44 (m, 5H), 7.33 – 7.28 (m, 3H), 7.27 – 7.20 (m, 4H), 7.13 (dd, *J* = 7.7, 1.3 Hz, 1H), 6.55 (d, *J* = 16.0 Hz, 1H), 6.23 (d, *J* = 16.0 Hz, 1H), 6.20 (s, 1H), 1.97 (s, 3H).

$^{13}\text{C}\{^1\text{H}\}$  NMR (125 MHz,  $\text{CDCl}_3$ )  $\delta$  139.61, 137.63, 136.03, 135.04, 131.55, 131.25, 130.83, 129.94, 129.41, 128.71, 128.58, 128.57, 128.51, 128.44, 128.38, 128.27, 128.06, 127.64, 126.93, 126.64, 125.98, 120.45(q,  $J = 326$  Hz), 64.33, 26.64.

**HRMS** (ESI-TOF)  $m/z$   $[\text{M} + \text{Na}]^+$  calcd for  $\text{C}_{25}\text{H}_{20}\text{F}_3\text{NNaO}_2\text{S}$  478.1059, found 478.1051.

*(E)-2,6-dimethyl-4-phenyl-2-styryl-1-((trifluoromethyl)sulfonyl)-1,2-dihydroquinoline*

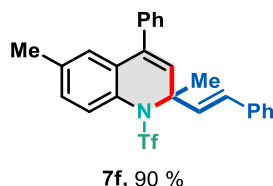

76.3 mg, 90%, yellowish liquid.

$^1\text{H}$  NMR (400 MHz,  $\text{CDCl}_3$ )  $\delta$  7.55 – 7.38 (m, 6H), 7.33 – 7.20 (m, 5H), 7.08 (dd,  $J = 8.2, 1.3$  Hz, 1H), 6.89 (d,  $J = 1.1$  Hz, 1H), 6.53 (d,  $J = 16.0$  Hz, 1H), 6.22 (d,  $J = 16.0$  Hz, 1H), 6.15 (s, 1H), 2.24 (s, 3H), 1.93 (s, 3H).

$^{13}\text{C}\{^1\text{H}\}$  NMR (100 MHz,  $\text{CDCl}_3$ )  $\delta$  139.66, 137.81, 137.59, 136.09, 132.47, 131.24, 131.20, 131.11, 129.72, 129.12, 128.70, 128.59, 128.44, 128.18, 128.03, 126.67, 126.46, 120.45 (q,  $J = 326.1$  Hz), 64.24, 26.71, 21.17.

**HRMS** (ESI-TOF)  $m/z$   $[\text{M} + \text{Na}]^+$  calcd for  $\text{C}_{26}\text{H}_{22}\text{F}_3\text{NNaO}_2\text{S}$  492.1216, found 492.1214.

*(E)-6-methoxy-2-methyl-4-phenyl-2-styryl-1-((trifluoromethyl)sulfonyl)-1,2-dihydroquinoline*

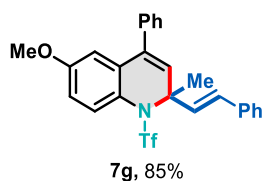

74.5 mg, 85%, white solid.

$^1\text{H}$  NMR (400 MHz,  $\text{CDCl}_3$ )  $\delta$  7.55 (d,  $J = 8.9$  Hz, 1H), 7.49 – 7.44 (m, 5H), 7.33 – 7.24 (m, 5H), 6.81 (dd,  $J = 8.9, 2.9$  Hz, 1H), 6.63 (d,  $J = 2.9$  Hz, 1H), 6.54 (d,  $J = 16.0$  Hz, 1H), 6.23 (d,  $J = 16.0$  Hz, 1H), 6.20 (s, 1H), 3.70 (s, 3H), 1.95 (s, 3H).

$^{13}\text{C}\{^1\text{H}\}$  NMR (100 MHz,  $\text{CDCl}_3$ )  $\delta$  158.56, 139.62, 137.56, 136.07, 132.61, 131.77, 131.12, 129.77, 129.56, 128.74, 128.60, 128.56, 128.30, 128.07, 127.85, 126.68, 120.45 (q,  $J = 326.3$  Hz), 113.00, 111.80, 64.27, 55.38.



**HRMS** (ESI-TOF)  $m/z$   $[M + Na]^+$  calcd for  $C_{26}H_{23}F_3NO_3S$  486.1345, found 486.1340.

**(E)-6-fluoro-2-methyl-4-phenyl-2-styryl-1-((trifluoromethyl)sulfonyl)-1,2-dihydroquinoline**

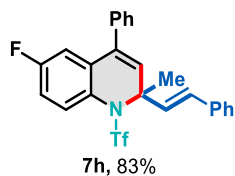

71 mg, 83%, solid, m.p. 123-126 °C.

$^1H$  NMR (400 MHz,  $CDCl_3$ )  $\delta$  7.58 (dd,  $J = 8.9, 5.1$  Hz, 1H), 7.52 – 7.45 (m, 3H), 7.44 – 7.38 (m, 2H), 7.30 – 7.20 (m, 5H), 7.01 – 6.90 (m, 1H), 6.80 (dt,  $J = 12.7, 6.4$  Hz, 1H), 6.50 (d,  $J = 16.0$  Hz, 1H), 6.22 (s,  $J = 7.4$  Hz, 1H), 6.17 (d,  $J = 16.0$  Hz, 1H), 1.95 (s, 3H).

$^{13}C\{^1H\}$  NMR (100 MHz,  $CDCl_3$ )  $\delta$  161.34 (d,  $J = 247.8$  Hz), 139.07 (s), 136.92 (s), 135.77 (s), 133.42 (d,  $J = 8.5$  Hz), 132.40 (s), 130.85 (d,  $J = 3.1$  Hz), 130.48 (s), 130.25 (s,  $J = 8.7$  Hz), 130.14 (d,  $J = 4.9$  Hz), 128.89 (s), 128.81 (s), 128.63 (s), 128.44 (s), 128.22 (s), 126.65 (s), 120.45 (q,  $J = 326.0$  Hz), 115.16 (d,  $J = 23.1$  Hz), 112.75 (d,  $J = 24.5$  Hz), 64.42 (s), 24.47.

**HRMS** (ESI-TOF)  $m/z$   $[M + H]^+$  calcd for  $C_{25}H_{20}F_4NO_2S$  474.1145, found 474.1141.

**(E)-6-chloro-2-methyl-4-phenyl-2-styryl-1-((trifluoromethyl)sulfonyl)-1,2-dihydroquinoline**

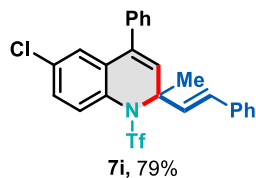

69.8 mg, 79%, colorless liquid.

$^1H$  NMR (500 MHz,  $CDCl_3$ )  $\delta$  7.56 (d,  $J = 8.6$  Hz, 1H), 7.50 (m, 3H), 7.44 – 7.36 (m, 2H), 7.33 – 7.28 (m, 3H), 7.28 – 7.24 (m, 3H), 7.09 (d,  $J = 2.1$  Hz, 1H), 6.52 (d,  $J = 15.9$  Hz, 1H), 6.21 (s, 1H), 6.18 (d,  $J = 16.0$  Hz, 1H), 1.96 (s, 3H).

$^{13}C\{^1H\}$  NMR (125 MHz,  $CDCl_3$ )  $\delta$  138.85, 136.86, 135.72, 133.49, 133.47, 132.99, 132.51, 130.34, 130.23, 129.67, 128.91, 128.81, 128.63, 128.45, 128.32, 128.25, 126.67, 125.80, 120.45 (q,  $J = 325.9$  Hz), 64.44, 26.58.

**HRMS** (ESI-TOF)  $m/z$   $[M + Na]^+$  calcd for  $C_{25}H_{19}ClF_3NNaO_2S$  512.0669, found 512.0661.

*(E)*-6-bromo-2-methyl-4-phenyl-2-styryl-1-((trifluoromethyl)sulfonyl)-1,2-dihydroquinoline

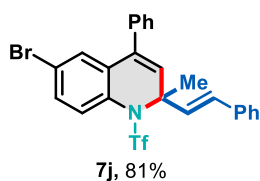

78 mg, 81%, brown oil.

$^1\text{H NMR}$  (400 MHz,  $\text{CDCl}_3$ )  $\delta$  7.53 – 7.44 (m, 4H), 7.44 – 7.36 (m, 3H), 7.33 – 7.21 (m, 6H), 6.51 (d,  $J = 16.0$  Hz, 1H), 6.23 – 6.13 (m, 2H), 1.94 (s, 3H).

$^{13}\text{C}\{^1\text{H}\}$  NMR (100 MHz,  $\text{CDCl}_3$ )  $\delta$  138.76, 136.85, 135.71, 134.02, 133.30, 132.56, 131.31, 130.32, 130.25, 129.96, 128.95, 128.84, 128.72, 128.66, 128.47, 128.28, 126.70, 121.94, 120.45(q,  $J = 325.8$  Hz), 64.42, 26.61.

**HRMS** (ESI-TOF)  $m/z$   $[\text{M} + \text{H}]^+$  calcd for  $\text{C}_{25}\text{H}_{20}\text{BrF}_3\text{NO}_2\text{S}$  534.0345, found 534.0331.

*(E)*-6-bromo-2,4-dimethyl-2-styryl-1-((trifluoromethyl)sulfonyl)-1,2-dihydroquinoline

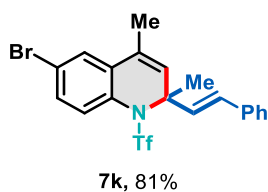

69.8 mg, 82%, sticky solid.

$^1\text{H NMR}$  (400 MHz,  $\text{CDCl}_3$ )  $\delta$  7.45 – 7.32 (m, 3H), 7.31 – 7.18 (m, 5H), 6.38 (d,  $J = 15.9$  Hz, 1H), 6.10 (d,  $J = 15.9$  Hz, 1H), 5.97 (s, 1H), 2.19 (s, 3H), 1.84 (s, 3H).

$^{13}\text{C}\{^1\text{H}\}$  NMR (100 MHz,  $\text{CDCl}_3$ )  $\delta$  135.85, 133.88, 133.31, 132.03, 131.98, 130.76, 129.93, 129.52, 128.64, 128.59, 128.12, 126.61, 126.19, 121.56, 120.45(q,  $J = 325.8$  Hz), 64.37, 26.50, 17.84.

**HRMS** (ESI-TOF)  $m/z$   $[\text{M} + \text{K}]^+$  calcd for  $\text{C}_{20}\text{H}_{17}\text{BrF}_3\text{KNO}_2\text{S}$  509.9747 found 509.9747.

*(E)*-methyl 2-methyl-4-phenyl-2-styryl-1-((trifluoromethyl)sulfonyl)-1,2-dihydroquinoline-6-carboxylate

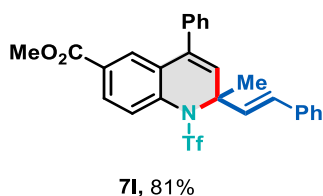

81%, 75.2 mg, white solid.

**<sup>1</sup>H NMR (500 MHz, CDCl<sub>3</sub>)** δ 7.96 (d, *J* = 8.5 Hz, 1H), 7.82 (s, 1H), 7.71 (d, *J* = 8.5 Hz, 1H), 7.53 – 7.48 (m, 3H), 7.44 (m, 2H), 7.27 (m, 5H), 6.51 (d, *J* = 15.9 Hz, 1H), 6.23 (s, 1H), 6.17 (d, *J* = 15.9 Hz, 1H), 3.85 (s, 3H), 1.98 (s, 3H).

**<sup>13</sup>C{<sup>1</sup>H} NMR (100 MHz, CDCl<sub>3</sub>)** δ 166.02, 139.28, 138.98, 137.01, 135.63, 132.03, 131.67, 130.34, 130.19, 129.39, 129.32, 128.93, 128.80, 128.60, 128.44, 128.24, 127.14, 126.66, 120.45 (q, *j* = 326.50 Hz), 64.68, 52.30, 26.59.

**HRMS (ESI-TOF)** *m/z* [M + H]<sup>+</sup> calcd for C<sub>27</sub>H<sub>23</sub>F<sub>3</sub>NO<sub>4</sub>S 514.1294, found 514.1286.

**(E)-8-fluoro-2-methyl-4-phenyl-2-styryl-1-((trifluoromethyl)sulfonyl)-1,2-dihydroquinoline**

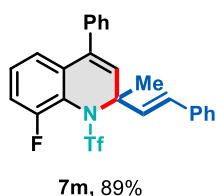

89%, 76.1 mg, colorless oil.

**<sup>1</sup>H NMR (500 MHz, CDCl<sub>3</sub>)** δ 7.55 – 7.43 (m, 6H), 7.31 – 7.20 (m, 5H), 7.08 (t, *J* = 8.8 Hz, 1H), 6.93 (d, *J* = 7.6 Hz, 1H), 6.54 (d, *J* = 15.9 Hz, 1H), 6.21 (s, 1H), 6.09 (d, *J* = 15.9 Hz, 1H), 2.07 (s, 3H).

**<sup>13</sup>C{<sup>1</sup>H} NMR (125 MHz, CDCl<sub>3</sub>)** δ 158.95-157.14 (d, *J* = 259.92 Hz), 139.70, 137.06, 135.71, 134.04, 132.73, 130.17, 130.11, 128.97, 128.90, 128.78, 128.73, 128.59, 128.47, 128.16, 126.64, 120.45 (q, *J* = 125.8), 116.72-116.47 (q, *J* = 21.14 Hz), 64.55, 25.97.

**HRMS (ESI-TOF)** *m/z* [M + H]<sup>+</sup> calcd for C<sub>25</sub>H<sub>20</sub>F<sub>4</sub>NO<sub>2</sub>S 474.1145, found 474.1142.

**(E)-2,6,8-trimethyl-4-phenyl-2-styryl-1-((trifluoromethyl)sulfonyl)-1,2-dihydroquinoline**

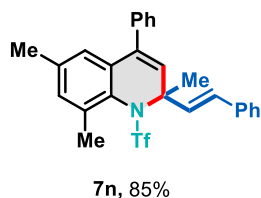

74.2 mg, 85%, colorless oil.

**<sup>1</sup>H NMR (500 MHz, CDCl<sub>3</sub>)** δ 7.49 (s, *J* = 26.3 Hz, 5H), 7.31 – 7.23 (m, 3H), 7.18 (d, *J* = 7.2 Hz, 2H), 6.97 (s, *J* = 27.2 Hz, 1H), 6.72 (s, *J* = 28.5 Hz, 1H), 6.43 (d, *J* = 15.9 Hz, 1H), 6.12 (s, 1H), 6.09 (d, *J* = 16.0 Hz, 1H), 2.50 (s, 3H), 2.20 (s, 3H), 2.04 (s, 3H).

$^{13}\text{C}\{^1\text{H}\}$  NMR (125 MHz,  $\text{CDCl}_3$ )  $\delta$  140.74, 137.76, 137.64, 137.53, 135.99, 132.35, 132.05, 131.60, 131.10, 129.73, 128.62, 128.56, 128.39, 127.99, 126.59, 124.37, 120.45 (q,  $J = 327.3$  Hz), 64.13, 26.11, 21.12, 19.42.

**HRMS** (ESI-TOF)  $m/z$   $[\text{M} + \text{H}]^+$  calcd for  $\text{C}_{27}\text{H}_{25}\text{F}_3\text{NO}_2\text{S}$  484.1553 found 484.1542.

*(E)*-6,8-dimethyl-6-styryl-5-((trifluoromethyl)sulfonyl)-5,6-dihydro-[1,3]dioxolo[4,5-g]quinoline

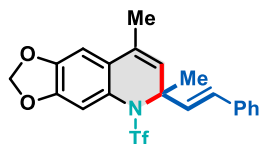

**7o**, 78%

61.6 mg, 78%, sticky liquid.

$^1\text{H}$  NMR (500 MHz,  $\text{CDCl}_3$ )  $\delta$  7.32 – 7.23 (m, 1H), 7.04 (s,  $J = 16.6$  Hz, 1H), 6.77 (s, 1H), 6.41 (d,  $J = 15.9$  Hz, 1H), 6.14 (d,  $J = 15.9$  Hz, 1H), 5.99 (dd,  $J = 10.3, 1.2$  Hz, 1H), 5.83 (s, 1H), 2.16 (s,  $J = 1.2$  Hz, 3H), 1.84 (s, 3H).

$^{13}\text{C}\{^1\text{H}\}$  NMR (125 MHz,  $\text{CDCl}_3$ )  $\delta$  147.09, 146.59, 136.13, 132.76, 131.60, 129.36, 128.79, 128.55, 128.39, 127.93, 127.07, 126.62, 120.45 (q,  $J = 125.3$  Hz), 109.59, 102.84, 101.80, 64.38, 26.54, 18.25.

**HRMS** (ESI-TOF)  $m/z$   $[\text{M} + \text{K}]^+$  calcd for  $\text{C}_{21}\text{H}_{18}\text{F}_3\text{KNO}_4\text{S}$  476.0540 found 476.0537.

*(E)*-2,4-dimethyl-2-(4-methylstyryl)-1-((trifluoromethyl)sulfonyl)-1,2-dihydroquinoline

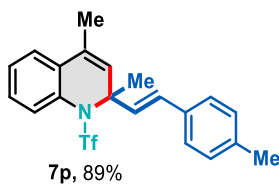

**7p**, 89%

64.5 mg, 89%, colorless liquid.

$^1\text{H}$  NMR (400 MHz,  $\text{CDCl}_3$ )  $\delta$  7.52 (d,  $J = 8.1$  Hz, 1H), 7.35 – 7.24 (m, 3H), 7.20 – 7.16 (m, 1H), 7.13 – 7.03 (m, 3H), 6.57 (d,  $J = 15.8$  Hz, 1H), 5.91 (s, 1H), 5.88 (d,  $J = 15.8$  Hz, 1H), 2.22 (s, 3H), 2.02 (s, 3H), 1.89 (s, 3H).

$^{13}\text{C}\{^1\text{H}\}$  NMR (100 MHz,  $\text{CDCl}_3$ )  $\delta$  135.59, 134.47, 132.99, 132.38, 132.28, 130.70, 130.03, 128.17, 127.88, 127.76, 127.65, 126.06, 123.04, 121.97 (q,  $J = 325.1$ ), 64.49, 26.51, 19.47, 17.89.

**HRMS** (ESI-TOF)  $m/z$   $[\text{M} + \text{H}]^+$  calcd for  $\text{C}_{21}\text{H}_{20}\text{F}_3\text{NNO}_2\text{S}$  408.1240 found 408.1240.

*(E)*-2-(4-chlorostyryl)-2,4-dimethyl-1-((trifluoromethyl)sulfonyl)-1,2-dihydroquinoline

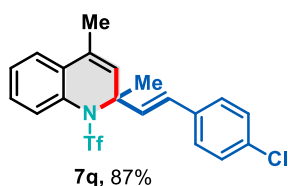

66.8 mg, 87%, yellowish liquid;

$^1\text{H NMR}$  (500 MHz,  $\text{CDCl}_3$ )  $\delta$  7.55 (d,  $J = 7.6$  Hz, 1H), 7.39 (d,  $J = 7.8$  Hz, 2H), 7.34 (d,  $J = 7.4$  Hz, 1H), 7.33 – 7.25 (m, 2H), 7.10 (d,  $J = 7.9$  Hz, 2H), 6.37 (d,  $J = 15.9$  Hz, 1H), 6.15 (d,  $J = 15.9$  Hz, 1H), 5.95 (s, 1H), 2.23 (s, 3H), 1.85 (s, 3H).

$^{13}\text{C}\{^1\text{H}\}$  NMR (125 MHz,  $\text{CDCl}_3$ )  $\delta$  135.06, 134.18, 133.03, 132.08, 131.99, 131.65, 130.40, 128.48, 128.11, 128.03, 127.96, 127.79, 123.13, 121.78, 125.45(q,  $J = 326$ ), 64.14, 26.43, 17.95.

HRMS (ESI-TOF)  $m/z$   $[\text{M} + \text{Na}]^+$  calcd for  $\text{C}_{20}\text{H}_{17}\text{ClF}_3\text{NNaO}_2\text{S}$  450.0513, found 450.0519.

*(E)*-2-(4-bromostyryl)-2,4-dimethyl-1-((trifluoromethyl)sulfonyl)-1,2-dihydroquinoline

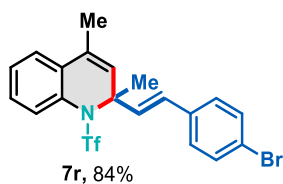

71.21 mg, 84%, colorless liquid.

$^1\text{H NMR}$  (500 MHz,  $\text{CDCl}_3$ )  $\delta$  7.56 (dd,  $J = 7.8, 1.3$  Hz, 1H), 7.37 – 7.33 (m, 1H), 7.32 – 7.26 (m, 2H), 7.24 (d,  $J = 8.5$  Hz, 2H), 7.17 (d,  $J = 8.5$  Hz, 2H), 6.39 (d,  $J = 16.0$  Hz, 1H), 6.14 (d,  $J = 15.9$  Hz, 1H), 5.96 (s, 1H), 2.24 (d,  $J = 1.2$  Hz, 3H), 1.86 (s, 3H).

$^{13}\text{C}\{^1\text{H}\}$  NMR (125 MHz,  $\text{CDCl}_3$ )  $\delta$  134.63, 134.19, 133.62, 133.01, 132.10, 131.87, 130.44, 128.70, 128.43, 128.03, 127.95, 127.81, 123.13, 120.25 (q,  $J = 325.8$ ), 64.16, 26.46, 17.94.

HRMS (ESI-TOF)  $m/z$   $[\text{M} + \text{H}]^+$  calcd for  $\text{C}_{20}\text{H}_{18}\text{BrF}_3\text{NO}_2\text{S}$  472.0188, found 472.0189.

*(E)*-2-(4-fluorostyryl)-2,4-dimethyl-1-((trifluoromethyl)sulfonyl)-1,2-dihydroquinoline

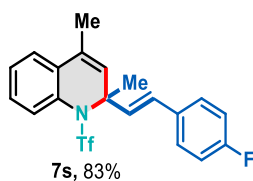

61.27 mg, 83%, colorless liquid.

**<sup>1</sup>H NMR** (500 MHz, CDCl<sub>3</sub>) δ 7.55 (dd, *J* = 7.7, 1.3 Hz, 1H), 7.36 – 7.33 (m, 1H), 7.33 – 7.25 (m, 2H), 7.24 – 7.17 (m, 2H), 6.96 (t, *J* = 8.7 Hz, 2H), 6.39 (d, *J* = 16.0 Hz, 1H), 6.08 (d, *J* = 15.9 Hz, 1H), 5.95 (s, 1H), 2.23 (d, *J* = 1.3 Hz, 3H), 1.85 (s, 3H).

**<sup>13</sup>C{<sup>1</sup>H} NMR** (125 MHz, CDCl<sub>3</sub>) δ 162.50 (d, *J* = 247.5 Hz), 134.21 (s), 132.91 (s), 132.28 (d, *J* = 3.3 Hz), 132.12 (s), 130.96 (s), 130.55 (s), 128.47 (s), 128.17 (s), 128.11 (s), 128.04 (s), 127.92 (s), 127.75 (s), 123.10 (s), 120.25 (q, *J* = 325.8 Hz), 64.18 (s), 26.52 (s), 17.94 (s).

**HRMS** (ESI-TOF) *m/z* [M + H]<sup>+</sup> calcd for C<sub>20</sub>H<sub>18</sub>F<sub>4</sub>NO<sub>2</sub>S 412.0989 found 412.0995.

**(E)-4-(2-(2,4-dimethyl-1-((trifluoromethyl)sulfonyl)-1,2-dihydroquinolin-2-yl)vinyl)benzonitrile**

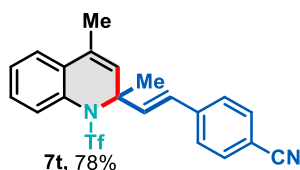

58.68 mg, 78%, sticky solid.

**<sup>1</sup>H NMR** (500 MHz, CDCl<sub>3</sub>) δ 7.55 (d, *J* = 8.0 Hz, 3H), 7.37 – 7.26 (m, 5H), 6.44 (d, *J* = 16.0 Hz, 1H), 6.28 (d, *J* = 16.0 Hz, 1H), 5.95 (s, 1H), 2.23 (s, 3H), 1.85 (s, 3H).

**<sup>13</sup>C{<sup>1</sup>H} NMR** (125 MHz, CDCl<sub>3</sub>) δ 140.61 (s), 135.18 (s), 134.08 (s), 133.33 (s), 132.36 (s), 131.93 (s), 129.95 (s), 128.10 (s), 127.99 (s), 127.96 (s), 127.90 (s), 127.08 (s), 123.22 (s), 120.25 (q, *J* = 325.8 Hz), 118.75 (s), 111.21 (s), 63.90 (s), 26.34 (s), 17.97 (s).

**HRMS** (ESI-TOF) *m/z* [M + H]<sup>+</sup> calcd for C<sub>21</sub>H<sub>18</sub>F<sub>3</sub>N<sub>2</sub>O<sub>2</sub>S 419.1036 found 419.1030.

**(E)-2,4-dimethyl-2-(4-(trifluoromethyl)styryl)-1-((trifluoromethyl)sulfonyl)-1,2-dihydroquinoline**

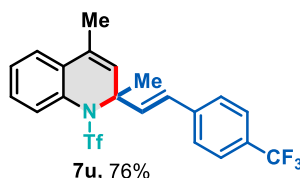

63.0 mg, 76%, brown oil.

**<sup>1</sup>H NMR** (400 MHz, CDCl<sub>3</sub>) δ 7.55 – 7.45 (m, 3H), 7.35 – 7.21 (m, 5H), 6.42 (d, *J* = 16.0 Hz, 1H), 6.22 (d, *J* = 16.0 Hz, 1H), 5.93 (s, 1H), 2.21 (d, *J* = 1.3 Hz, 3H), 1.83 (s, 3H).

**<sup>13</sup>C{<sup>1</sup>H} NMR** (100 MHz, CDCl<sub>3</sub>) δ 140.08, 134.32 (s), 134.08 (s), 133.37 (s), 132.19 (s), 130.36 (s), 129.90, 128.44 (s), 128.19 (d, *J* = 1.5 Hz), 128.00 (s), 126.91 (s), 125.66 (q, *J* = 3.9 Hz), 123.32 (s), 120.45 (q, *J* = 125.2 Hz), 64.18 (s), 26.57 (s), 18.12 (s).

**HRMS** (ESI-TOF)  $m/z$   $[M + K]^+$  calcd for  $C_{21}H_{17}F_6KNO_2S$  500.0516, found 500.0508.

**(E)-2-(3-fluorostyryl)-2,4-dimethyl-1-((trifluoromethyl)sulfonyl)-1,2-dihydroquinoline**

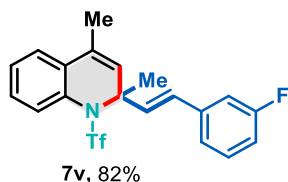

60.53 mg, 82%, colorless liquid.

**$^1H$  NMR** (400 MHz,  $CDCl_3$ )  $\delta$  7.56 – 7.47 (m, 1H), 7.34 – 7.29 (m, 1H), 7.29 – 7.22 (m, 2H), 7.22 – 7.16 (m, 1H), 6.97 (d,  $J = 7.7$  Hz, 1H), 6.94 – 6.85 (m,  $J = 8.8$  Hz, 2H), 6.37 (d,  $J = 15.9$  Hz, 1H), 6.14 (d,  $J = 15.9$  Hz, 1H), 5.92 (d,  $J = 0.9$  Hz, 1H), 2.21 (d,  $J = 1.4$  Hz, 3H), 1.83 (s, 3H).

**$^{13}C\{^1H\}$  NMR** (100 MHz,  $CDCl_3$ )  $\delta$  162.95 (d,  $J = 245.6$  Hz), 138.45 (d,  $J = 7.8$  Hz), 134.18 (s), 133.06 (s), 132.65 (s), 132.06 (s), 130.37 (s), 129.99 (d,  $J = 8.4$  Hz), 128.53 (d,  $J = 2.4$  Hz), 128.02 (s), 127.97 (s), 127.79 (s), 123.13 (s), 122.44 (d,  $J = 2.7$  Hz), 120.45 (q,  $J = 325.8$  Hz), 114.73 (d,  $J = 21.4$  Hz), 113.08 (d,  $J = 21.8$  Hz), 64.07 (s), 26.45 (s), 17.94 (s).

**HRMS** (ESI-TOF)  $m/z$   $[M + H]^+$  calcd for  $C_{20}H_{18}F_4NO_2S$  412.0989, found 412.0986.

**(E)-2-(3-chlorostyryl)-2,4-dimethyl-1-((trifluoromethyl)sulfonyl)-1,2-dihydroquinoline**

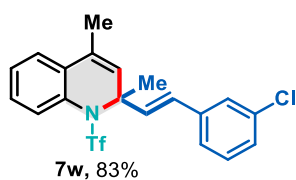

63.8 mg, 83%, colorless liquid.

**$^1H$  NMR** (400 MHz,  $CDCl_3$ )  $\delta$  7.51 (m, 1H), 7.33 – 7.22 (m, 1H), 7.20 – 7.14 (m, 3.65H), 7.11 – 7.01 (m, 3H), 6.33 (d,  $J = 15.9$  Hz, 1H), 6.12 (d,  $J = 15.9$  Hz, 1H), 5.90 (d,  $J = 1.1$  Hz, 1H), 2.20 (d,  $J = 1.5$  Hz, 3H), 1.82 (s, 3H).

**$^{13}C\{^1H\}$  NMR** (100 MHz,  $CDCl_3$ )  $\delta$  137.96 (s), 134.48 (s), 134.18 (s), 133.09 (s), 132.76 (s), 132.03 (s), 130.32 (s), 129.74 (s), 128.31 (s), 128.01 (s), 127.99 (s), 127.85 (s), 127.78 (s), 126.52 (s), 124.71 (s), 123.12 (s), 120.45 (q,  $J = 325.8$  Hz), 64.06 (s), 26.48 (s), 17.93 (s).

**HRMS** (ESI-TOF)  $m/z$   $[M + Na]^+$  calcd for  $C_{20}H_{17}ClF_3NNaO_2S$  450.0513 found 450.0507.

*(E)*-2-(2-chloro-6-fluorostyryl)-2,4-dimethyl-1-((trifluoromethyl)sulfonyl)-1,2-dihydroquinoline

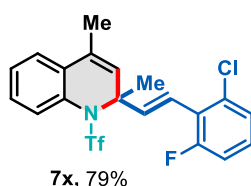

63.0 mg, 79%, colorless liquid.

$^1\text{H NMR}$  (500 MHz,  $\text{CDCl}_3$ )  $\delta$  7.58 – 7.51 (m, 1H), 7.36 – 7.24 (m, 3H), 7.13 – 7.03 (m, 2H), 6.91 (m, 1H), 6.47 (d,  $J = 16.3$  Hz, 1H), 6.27 (d,  $J = 16.3$  Hz, 1H), 5.92 (d,  $J = 0.9$  Hz, 1H), 2.23 (d,  $J = 1.4$  Hz, 3H), 1.93 (s, 3H).

$^{13}\text{C}\{^1\text{H}\}$  NMR (125 MHz,  $\text{CDCl}_3$ )  $\delta$  160.81 (d,  $J = 252.2$  Hz), 138.71 (d,  $J = 10.5$  Hz), 134.43 (d,  $J = 5.3$  Hz), 134.37 (s), 133.56 (s), 132.16 (s), 130.09 (s), 128.46 (d,  $J = 10.0$  Hz), 128.21 (s), 127.88 (s), 127.68 (s), 125.33 (d,  $J = 3.5$  Hz), 123.15 (s), 123.04 (s), 120.45 (q,  $J = 325.6$  Hz), 120.26 (s), 114.44 (d,  $J = 23.4$  Hz), 64.65 (s), 26.31 (s), 17.90 (s).

**HRMS** (ESI-TOF)  $m/z$   $[\text{M} + \text{H}]^+$  calcd for  $\text{C}_{20}\text{H}_{17}\text{ClF}_4\text{NO}_2\text{S}$  446.0599 found 446.0597.

*(E)*-2-(2,4-dichlorostyryl)-2,4-dimethyl-1-((trifluoromethyl)sulfonyl)-1,2-dihydroquinoline

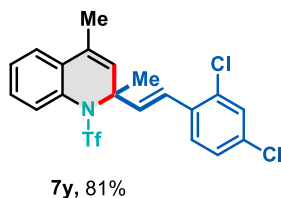

67.2 mg, 81%, sticky solid.

$^1\text{H NMR}$  (400 MHz,  $\text{CDCl}_3$ )  $\delta$  7.59 – 7.45 (m, 1H), 7.36 – 7.24 (m, 4H), 7.19 (dd,  $J = 7.8, 1.2$  Hz, 1H), 7.08 (t,  $J = 7.9$  Hz, 1H), 6.78 (d,  $J = 15.9$  Hz, 1H), 6.06 (d,  $J = 15.9$  Hz, 1H), 5.94 (s, 1H), 2.22 (d,  $J = 1.4$  Hz, 3H), 1.84 (s, 3H).

$^{13}\text{C}\{^1\text{H}\}$  NMR (100 MHz,  $\text{CDCl}_3$ )  $\delta$  137.02 (s), 135.00 (s), 134.16 (s), 133.36 (s), 133.20 (s), 132.08 (s), 131.38 (s), 130.01 (s), 129.51 (s), 128.09 (s), 128.00 (s), 127.84 (s), 127.19 (s), 126.61 (s), 125.46 (s), 123.27 (s), 120.45 (q,  $J = 325.7$  Hz), 64.10 (s), 26.29 (s), 17.94 (s).

**HRMS** (ESI-TOF)  $m/z$   $[\text{M} + \text{H}]^+$  calcd for  $\text{C}_{20}\text{H}_{17}\text{Cl}_2\text{F}_3\text{NO}_2\text{S}$  462.0304 found 462.0294.

*(E)*-2-(4-bromostyryl)-2-methyl-4-phenyl-1-((trifluoromethyl)sulfonyl)-1,2-dihydroquinoline



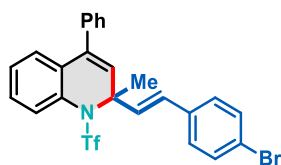

7z, 84%

83.6 mg, 87%, white solid.

$^1\text{H NMR}$  (500 MHz,  $\text{CDCl}_3$ )  $\delta$  7.64 (dd,  $J = 8.1, 1.1$  Hz, 1H), 7.53 – 7.44 (m, 5H), 7.43 – 7.39 (m, 2H), 7.31 (td,  $J = 7.8, 1.6$  Hz, 1H), 7.23 (td,  $J = 7.6, 1.2$  Hz, 1H), 7.16 – 7.08 (m, 3H), 6.49 (d,  $J = 16.0$  Hz, 1H), 6.23 (d,  $J = 16.0$  Hz, 1H), 6.19 (s, 1H), 1.96 (s, 3H).

$^{13}\text{C}\{^1\text{H}\}$  NMR (125 MHz,  $\text{CDCl}_3$ )  $\delta$  139.75, 137.52, 134.99, 134.95, 131.71, 131.56, 131.50, 130.95, 128.82, 128.74, 128.58, 128.55, 128.46, 128.43, 128.16, 127.70, 126.03, 121.96, 120.45 (q,  $J = 326$  Hz), 64.22, 26.51.

HRMS (ESI-TOF)  $m/z$   $[\text{M} + \text{Na}]^+$  calcd for  $\text{C}_{25}\text{H}_{19}\text{BrF}_3\text{NNaO}_2\text{S}$  556.0164 found 556.0151.

*(E)-2-(4-chlorostyryl)-2,6-dimethyl-4-phenyl-1-((trifluoromethyl)sulfonyl)-1,2-dihydroquinoline*

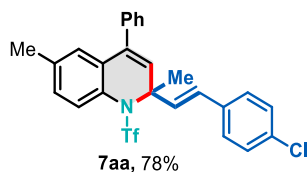

7aa, 78%

70 mg, 78%, viscous liquid.

$^1\text{H NMR}$  (500 MHz,  $\text{CDCl}_3$ )  $\delta$  7.53 – 7.46 (m, 4H), 7.45 – 7.40 (m, 2H), 7.25 (d,  $J = 8.5$  Hz, 2H), 7.18 (d,  $J = 8.5$  Hz, 2H), 7.09 (d,  $J = 9.7$  Hz, 1H), 6.89 (s, 1H), 6.48 (d,  $J = 16.0$  Hz, 1H), 6.19 (d,  $J = 16.0$  Hz, 1H), 6.13 (s, 1H), 2.25 (s, 3H), 1.91 (s, 3H), 1.61 (s, 3H).

$^{13}\text{C NMR}$  (125 MHz,  $\text{CDCl}_3$ )  $\delta$  139.74, 137.68, 137.63, 134.54, 133.74, 132.39, 131.67, 131.11, 130.94, 129.15, 128.73, 128.68, 128.54, 128.46, 128.14, 127.84, 126.46, 121.69, 119.09 (q,  $J = 326.0$  Hz), 64.08, 26.57, 21.15.

HRMS (ESI-TOF)  $m/z$   $[\text{M} + \text{Na}]^+$  calcd for  $\text{C}_{27}\text{H}_{25}\text{ClF}_3\text{NNaO}_2\text{S}$  542.1139, found 542.1145.

*(E)-2,4-dimethyl-2-(2-(naphthalen-2-yl)vinyl)-1-((trifluoromethyl)sulfonyl)-1,2-dihydroquinoline*

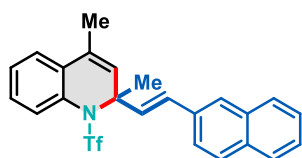

7ab, 84%

67.0 mg, 84%, yellowish liquid.

$^1\text{H NMR}$  (400 MHz,  $\text{CDCl}_3$ )  $\delta$  7.80 (d,  $J = 8.1$  Hz, 1H), 7.74 (d,  $J = 8.0$  Hz, 1H), 7.62 – 7.57 (m, 1H), 7.48 – 7.44 (m, 1H), 7.43 – 7.39 (m, 3H), 7.39 – 7.33 (m, 2H), 7.33 – 7.25 (m, 2H), 7.07 (d,  $J = 15.7$  Hz, 1H), 6.04 (d,  $J = 15.7$  Hz, 1H), 6.01 (s,  $J = 1.0$  Hz, 1H), 2.28 (d,  $J = 1.4$  Hz, 3H), 1.97 (s, 3H).

$^{13}\text{C}\{^1\text{H}\}$  NMR (100 MHz,  $\text{CDCl}_3$ )  $\delta$  134.58 (s), 134.34 (s), 134.25 (s), 133.37 (s), 133.25 (s), 132.43 (s), 131.14 (s), 130.73 (s), 128.44 (s), 128.29 (s), 128.14 (s), 127.98 (d,  $J = 6.4$  Hz), 127.94 (s), 127.74 (s), 125.96 (s), 125.84 (s), 125.54 (s), 124.26 (s), 123.76 (s), 123.17 (s), 120.45 (q,  $J = 325.8$  Hz), 64.54 (s), 26.43 (s), 17.97 (s).

HRMS (ESI-TOF)  $m/z$   $[\text{M} + \text{H}]^+$  calcd for  $\text{C}_{24}\text{H}_{21}\text{F}_3\text{NO}_2\text{S}$  444.1240 found 444.1235.

**(E)-2-(2-([1,1'-biphenyl]-4-yl)vinyl)-2,4-dimethyl-1-((trifluoromethyl)sulfonyl)-1,2-dihydroquinoline**

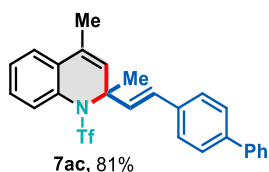

CCDC: 2074148

68.3 mg, 81%, colorless liquid.

$^1\text{H}$  NMR (500 MHz,  $\text{CDCl}_3$ )  $\delta$  7.58 (d,  $J = 7.5$  Hz, 3H), 7.52 (d,  $J = 8.1$  Hz, 2H), 7.45 (t,  $J = 7.6$  Hz, 2H), 7.39 – 7.34 (m, 2H), 7.34 – 7.26 (m, 4H), 6.47 (d,  $J = 15.9$  Hz, 1H), 6.21 (d,  $J = 15.9$  Hz, 1H), 5.98 (s, 1H), 2.25 (s, 3H), 1.89 (s, 3H).

$^{13}\text{C}\{^1\text{H}\}$  NMR (125 MHz,  $\text{CDCl}_3$ )  $\delta$  140.80 (s), 140.56 (s), 135.16 (s), 134.30 (s), 132.90 (s), 132.17 (s), 131.31 (s), 130.68 (s), 129.17 (s), 128.81 (s), 128.07 (s), 127.92 (s), 127.73 (s), 127.42 (s), 127.24 (s), 127.01 (s), 126.94 (s), 123.09 (s), 120.45 (q,  $J = 326.0$  Hz), 64.32 (s), 26.58 (s), 17.95 (s).

HRMS (ESI-TOF)  $m/z$   $[\text{M} + \text{H}]^+$  calcd for  $\text{C}_{26}\text{H}_{22}\text{F}_3\text{NO}_2\text{S}$  470.1396 found 470.1389.

**(1R,2R,5R)-2-isopropyl-5-methylcyclohexyl 4-((E)-2-(2,4-dimethyl-1-((trifluoromethyl)sulfonyl)-1,2-dihydroquinolin-2-yl)vinyl)benzoate**

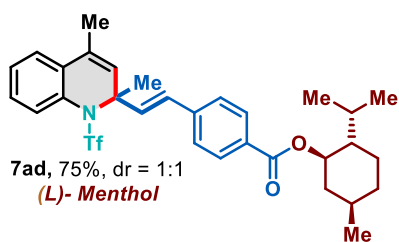

86 mg, 75%, sticky white solid.

$^1\text{H}$  NMR (400 MHz,  $\text{CDCl}_3$ )  $\delta$  7.92 (d,  $J = 8.3$  Hz, 2H), 7.58 – 7.46 (m, 1H), 7.34 – 7.28 (m, 1H), 7.28 – 7.21 (m, 4H), 6.43 (d,  $J = 16.0$  Hz, 1H), 6.32 – 6.15 (m, 1H), 5.93 (s, 1H), 4.90 (td,  $J = 10.8, 4.3$  Hz, 1H), 2.21 (d,  $J = 1.4$  Hz, 3H), 2.14 – 2.05 (m, 1H), 1.95 – 1.88 (m, 1H), 1.84 (s, 3H), 1.77 – 1.67 (m, 2H), 1.59 – 1.47 (m, 2H), 1.18 – 1.05 (m, 2H), 0.98 – 0.85 (m, 7H), 0.77 (d,  $J = 6.9$  Hz, 3H).

$^{13}\text{C}\{^1\text{H}\}$  NMR (100 MHz,  $\text{CDCl}_3$ )  $\delta$  165.70, 140.39, 134.18, 133.73, 133.67, 133.15, 132.06, 130.30, 130.07, 129.84, 128.78, 128.74, 128.02, 127.98, 127.80, 126.40, 123.13, 120.45 (q,  $J = 325.8$  Hz),

74.85, 64.11, 47.27, 40.96, 34.31, 31.44, 26.56, 26.53, 26.39, 23.68, 23.65, 22.05, 20.74, 17.94, 16.57, 16.54.

**HRMS** (ESI-TOF)  $m/z$   $[M + K]^+$  calcd for  $C_{31}H_{36}F_3KNO_4S$  614.1949 found 614.1944.

**(E)-2-isopropyl-5-methylphenyl 4-(2-(2,4-dimethyl-1-((trifluoromethyl)sulfonyl)-1,2-dihydroquinolin-2-yl)vinyl)benzoate**

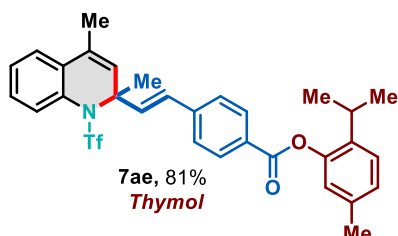

81%, 92 mg, colorless liquid.

**$^1H$  NMR** (500 MHz,  $CDCl_3$ )  $\delta$  8.11 (d,  $J = 8.3$  Hz, 1H), 7.57 (d,  $J = 7.5$  Hz, 1H), 7.39 – 7.33 (m, 3H), 7.33 – 7.27 (m, 2H), 7.27 – 7.24 (m, 1H), 7.08 (d,  $J = 7.8$  Hz, 1H), 6.50 (d,  $J = 16.0$  Hz, 1H), 6.31 (d,  $J = 15.9$  Hz, 1H), 5.97 (s, 1H), 3.07 – 2.97 (m, 1H), 2.36 (s,  $J = 7.2$  Hz, 3H), 2.25 (d,  $J = 1.0$  Hz, 3H), 1.88 (s, 3H), 1.21 (d,  $J = 6.9$  Hz, 6H).

**$^{13}C\{^1H\}$  NMR** (125 MHz,  $CDCl_3$ )  $\delta$  164.96, 148.10, 141.24, 137.13, 136.67, 134.33, 134.19, 133.22, 132.04, 130.45, 130.23, 129.55, 128.80, 128.61, 128.04, 127.85, 127.21, 126.69, 126.50, 123.18, 122.84, 120.45 (q,  $J = 325.7$  Hz), 64.08, 27.31, 26.41, 23.02, 20.87, 17.98.

**HRMS** (ESI-TOF)  $m/z$   $[M + Na]^+$  calcd for  $C_{31}H_{30}F_3NNaO_4S$  592.1740 found 592.1748.

**(3S,8S,9S,10R,13R,14S,17R)-10,13-dimethyl-17-((S)-6-methylheptan-2-yl)-2,3,4,7,8,9,10,11,12,13,14,15,16,17-tetradecahydro-1H-cyclopenta[a]phenanthren-3-yl 4-((E)-2-(2,4-dimethyl-1-((trifluoromethyl)sulfonyl)-1,2-dihydroquinolin-2-yl)vinyl)benzoate**

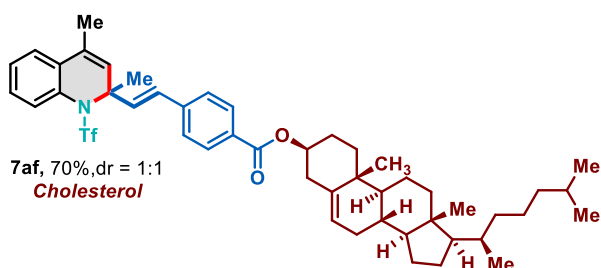

112 mg, 70%, sticky solid.

**$^1H$  NMR** (400 MHz,  $CDCl_3$ )  $\delta$  7.91 (d,  $J = 8.1$  Hz, 2H), 7.53 (d,  $J = 7.4$  Hz, 1H), 7.35 – 7.20 (m, 5H), 6.43 (d,  $J = 16.0$  Hz, 1H), 6.23 (d,  $J = 16.0$  Hz, 1H), 5.93 (s, 1H), 5.41 (d,  $J = 3.7$  Hz, 1H), 4.93 – 4.73 (m, 1H), 2.44 (d,  $J = 7.7$  Hz, 2H), 2.21 (s, 3H), 2.08 – 1.90 (m, 4H), 1.84 (s, 3H), 1.78 – 1.66 (m, 1H), 1.65 – 1.44 (m, 7H), 1.31 (m, 5H), 1.25 – 1.08 (m, 7H), 1.06 (s, 3H), 1.03 – 0.96 (m, 2H), 0.93 (d,  $J = 6.4$  Hz, 3H), 0.88 (d,  $J = 6.4$  Hz, 7H), 0.69 (s, 3H).

$^{13}\text{C}\{^1\text{H}\}$  NMR (100 MHz,  $\text{CDCl}_3$ )  $\delta$  165.59, 140.38, 139.62, 134.18, 133.67, 133.13, 132.05, 130.31, 130.07, 129.82, 128.77, 128.03, 127.98, 127.80, 126.37, 123.14, 122.81, 120.45 (q,  $J = 325.7$  Hz), 74.60, 64.11, 56.70, 56.15, 50.05, 42.33, 39.75, 39.54, 38.21, 37.03, 36.65, 36.21, 35.83, 31.95, 31.89, 28.26, 28.04, 27.88, 26.39, 24.32, 23.86, 22.86, 22.60, 21.07, 19.39, 18.75, 17.95, 11.89.

HRMS (ESI-TOF)  $m/z$   $[\text{M} + \text{H}]^+$  calcd for  $\text{C}_{48}\text{H}_{63}\text{F}_3\text{NO}_2\text{S}$  806.4424 found 806.4428.

**(E)-3,7-dimethyloct-6-en-1-yl 4-(2-(2,4-dimethyl-1-((trifluoromethyl)sulfonyl)-1,2-dihydroquinolin-2-yl)vinyl)benzoate**

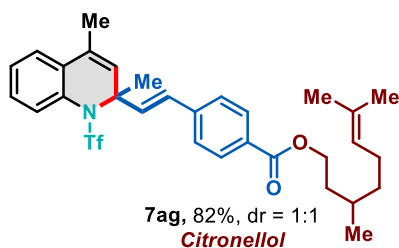

82%, 94 mg, colorless liquid

$^1\text{H}$  NMR (500 MHz,  $\text{CDCl}_3$ )  $\delta$  7.93 (d,  $J = 8.2$  Hz, 2H), 7.55 (d,  $J = 7.6$  Hz, 1H), 7.34 (d,  $J = 7.9$  Hz, 1H), 7.32 – 7.24 (m, 4H), 6.46 (d,  $J = 16.0$  Hz, 1H), 6.26 (d,  $J = 16.0$  Hz, 1H), 5.95 (s, 1H), 5.12 (t,  $J = 6.8$  Hz, 1H), 4.42 – 4.25 (m, 2H), 2.23 (s, 3H), 2.02 (m, 2H), 1.86 (s, 3H), 1.80 (m, 1H), 1.70 (s, 3H), 1.66 (m, 1H), 1.62 (s, 3H), 1.58 (m, 1H), 1.47 – 1.38 (m, 1H), 1.29 – 1.22 (m, 1H), 0.98 (d,  $J = 6.5$  Hz, 3H).

$^{13}\text{C}\{^1\text{H}\}$  NMR (125 MHz,  $\text{CDCl}_3$ )  $\delta$  166.26, 140.49, 134.20, 133.78, 131.37, 130.33, 129.80, 129.76, 128.75, 128.01, 127.98, 127.78, 126.42, 124.56, 123.13, 120.25 (q,  $J = 325.7$  Hz), 64.10, 63.52, 36.98, 35.50, 29.60, 26.37, 25.69, 25.40, 19.49, 17.91, 17.65.

HRMS (ESI-TOF)  $m/z$   $[\text{M} + \text{Na}]^+$  calcd for  $\text{C}_{31}\text{H}_{36}\text{F}_3\text{NNaO}_4\text{S}$  598.2209 found 598.2198.

**(E)-2,4-dimethyl-2-(4-methylstyryl)-2H-chromene**

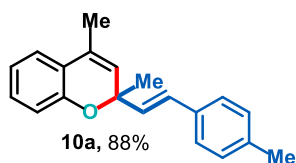

44.49mg, 88%, colorless sticky liquid

$^1\text{H}$  NMR (500 MHz,  $\text{CDCl}_3$ )  $\delta$  7.27 (d,  $J = 8.2$  Hz, 2H), 7.21 – 7.15 (m, 2H), 7.12 (d,  $J = 7.8$  Hz, 2H), 6.91 (m, 2H), 6.57 (d,  $J = 16.0$  Hz, 1H), 6.27 (d,  $J = 16.2$  Hz, 1H), 5.51 (d,  $J = 1.5$  Hz, 1H), 2.34 (s, 3H), 2.11 (d,  $J = 1.5$  Hz, 3H).

$^{13}\text{C}\{^1\text{H}\}$  NMR (126 MHz,  $\text{CDCl}_3$ )  $\delta$  153.00, 137.55, 134.00, 131.68, 129.30, 129.21, 128.89, 128.86, 126.64, 124.93, 123.56, 120.79, 116.39, 77.50, 27.68, 21.31, 18.21.

HRMS (ESI-TOF)  $m/z$   $[\text{M} + \text{H}]^+$  calcd for  $\text{C}_{20}\text{H}_{21}\text{O}_2$  277.1587, found 277.1582.

**(E)-2-(4-chlorostyryl)-2,4-dimethyl-2H-chromene**

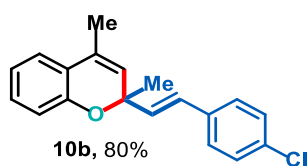

47.36mg, 80%, colorless sticky liquid

**<sup>1</sup>H NMR (500 MHz, CDCl<sub>3</sub>)** δ 7.29 – 7.26 (m, 4H), 7.17 (m, 2H), 6.91 (t, *J* = 7.6 Hz, 1H), 6.89 (d, *J* = 8.1 Hz, 1H), 6.54 (d, *J* = 16.0 Hz, 1H), 6.27 (d, *J* = 16.0 Hz, 1H), 5.49 (d, *J* = 1.5 Hz, 1H), 2.10 (d, *J* = 1.5 Hz, 3H), 1.63 (s, 3H).

**<sup>13</sup>C{<sup>1</sup>H} NMR (125 MHz, CDCl<sub>3</sub>)** δ 152.89, 135.35, 133.38, 133.33, 129.33, 129.14, 128.75, 127.96, 127.68, 124.53, 123.64, 122.94, 120.93, 116.37, 77.36, 27.69, 18.22.

**HRMS (ESI-TOF)** *m/z* [M+H]<sup>+</sup> calcd for C<sub>19</sub>H<sub>18</sub>ClO<sub>2</sub> 297.1041, found 297.1031.

**(E)-2,4-dimethyl-2-(2-(naphthalen-1-yl)vinyl)-2H-chromene**

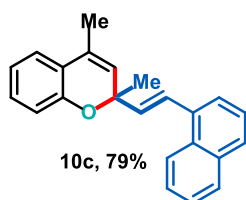

49.29mg, 79%, colorless liquid

**<sup>1</sup>H NMR (500 MHz, CDCl<sub>3</sub>)** δ 7.96 – 7.89 (m, 1H), 7.85 (dd, *J* = 6.3, 3.2 Hz, 1H), 7.78 (d, *J* = 8.2 Hz, 1H), 7.57 (d, *J* = 8.1 Hz, 1H), 7.50 (m, 2H), 7.46 – 7.41 (m, 1H), 7.38 (d, *J* = 15.7 Hz, 1H), 7.24 (m, 2H), 7.02 – 6.94 (m, 2H), 6.30 (d, *J* = 15.7 Hz, 1H), 5.61 (s, 1H), 2.16 (d, *J* = 1.3 Hz, 3H), 1.75 (s, 3H).

**<sup>13</sup>C{<sup>1</sup>H} NMR (125 MHz, CDCl<sub>3</sub>)** δ 153.03, 135.43, 134.68, 133.57, 131.29, 129.24, 129.22, 128.45, 127.89, 126.21, 125.97, 125.73, 125.55, 124.79, 123.84, 123.55, 123.21, 120.86, 116.42, 77.51, 27.66, 18.12.

**HRMS (ESI-TOF)** *m/z* [M + H]<sup>+</sup> calcd for C<sub>23</sub>H<sub>21</sub>O 331.1587, found 331.1575.

**(E)-2-(2-cyclohexylvinyl)-2,4-dimethyl-2H-chromene**

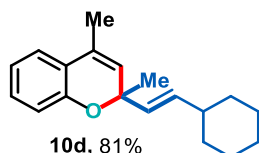

42.90, 81%, colorless liquid

**<sup>1</sup>H NMR (400 MHz, CDCl<sub>3</sub>)** δ 7.15 – 7.08 (m, 2H), 6.86 (td, *J* = 7.5, 1.2 Hz, 1H), 6.80 (dd, *J* = 7.9, 0.9 Hz, 1H), 5.60 (dd, *J* = 15.7, 6.3 Hz, 1H), 5.51 (dd, *J* = 15.8, 0.9 Hz, 1H), 5.38 (d, *J* = 1.4 Hz, 1H), 2.03

(d,  $J = 1.4$  Hz, 3H), 1.95 – 1.85 (m, 1H), 1.65 (dd,  $J = 14.5, 6.9$  Hz, 4H), 1.48 (s, 6H), 1.29 – 0.94 (m, 6H).

$^{13}\text{C}$  NMR (100 MHz,  $\text{CDCl}_3$ )  $\delta$  152.91, 136.12, 130.41, 128.85, 128.14, 125.65, 123.24, 123.10, 120.43, 116.25, 77.28, 40.19, 32.74, 27.22, 26.15, 25.99, 18.03.

HRMS (ESI-TOF)  $m/z$   $[\text{M} + \text{H}]^+$  calcd for  $\text{C}_{19}\text{H}_{25}\text{O}$  269.1900, found 269.1960.

**(E)-2-methyl-4-phenyl-2-styryl-2H-chromene**

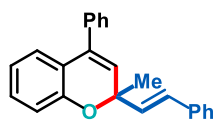

**10e**, 83%

53.78mg, 83%, colorless liquid

$^1\text{H}$  NMR (400 MHz,  $\text{CDCl}_3$ )  $\delta$  7.45 – 7.33 (m, 7H), 7.29 (t,  $J = 7.4$  Hz, 2H), 7.22 (t,  $J = 7.8$  Hz, 1H), 7.17 (t,  $J = 7.7$  Hz, 1H), 7.02 (d,  $J = 7.7$  Hz, 1H), 6.95 (d,  $J = 8.1$  Hz, 1H), 6.82 (t,  $J = 6.9$  Hz, 1H), 6.68 (d,  $J = 16.1$  Hz, 1H), 6.36 (d,  $J = 16.1$  Hz, 1H), 5.69 (s, 1H), 1.71 (s, 3H).

$^{13}\text{C}\{^1\text{H}\}$  NMR (100 MHz,  $\text{CDCl}_3$ )  $\delta$  153.30, 138.29, 136.58, 136.00, 131.94, 129.51, 129.43, 128.78, 128.53, 128.40, 127.87, 127.75, 126.68, 126.25, 125.79, 122.29, 120.78, 116.82, 77.27, 27.38.

HRMS (ESI-TOF)  $m/z$   $[\text{M} + \text{H}]^+$  calcd for  $\text{C}_{24}\text{H}_{21}\text{O}$  325.1587, found 325.1584.

**(E)-2-(3,7-dimethylocta-1,6-dien-1-yl)-2,4-dimethyl-2H-chromene**

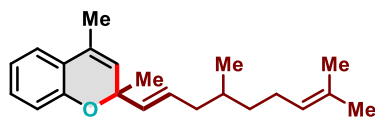

**10f**, 78%, dr = 1:1  
*Citronellal*

46.18mg, 78%, colorless liquid.

$^1\text{H}$  NMR (500 MHz,  $\text{CDCl}_3$ )  $\delta$  7.16 – 7.08 (m, 2H), 6.86 (t,  $J = 8.2$  Hz, 1H), 6.80 (d,  $J = 7.9$  Hz, 1H), 5.65 – 5.56 (m, 1H), 5.52 (d,  $J = 16.8$  Hz, 1H), 5.40 (s, 1H), 5.10 – 4.96 (m, 1H), 2.04 (s, 3H), 2.01 – 1.76 (m, 4H), 1.68 (s, 3H), 1.58 (s, 3H), 1.50 (s, 3H), 1.41 (m, 1H), 1.27 – 1.15 (m, 1H), 1.10 – 0.98 (m, 1H), 0.75 (d, 6.6 Hz, 3H).

$^{13}\text{C}\{^1\text{H}\}$  NMR (125 MHz,  $\text{CDCl}_3$ )  $\delta$  153.12, 134.19, 134.13, 131.18, 131.16, 129.35, 129.32, 129.02, 128.67, 128.64, 126.88, 125.63, 125.01, 125.00, 123.42, 123.40, 123.38, 120.69, 120.65, 116.44, 77.16, 39.64, 36.67, 36.52, 32.63, 27.52, 27.49, 25.86, 25.65, 25.62, 19.44, 19.32, 18.13, 17.77.

HRMS (ESI-TOF)  $m/z$   $[\text{M} + \text{K}]^+$  calcd for  $\text{C}_{22}\text{H}_{30}\text{KO}$  349.1928, found 349.1930.

*(E)*-3,7-dimethyloct-6-en-1-yl 4-(2-(2,4-dimethyl-2H-chromen-2-yl)vinyl)benzoate

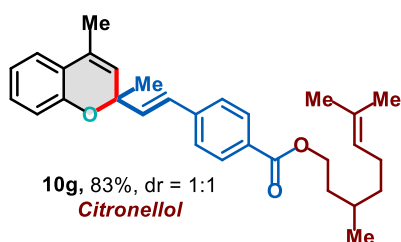

71mg, 83%, colorless liquid

$^1\text{H NMR}$  (400 MHz,  $\text{CDCl}_3$ )  $\delta$  7.94 (d,  $J = 8.4$  Hz, 2H), 7.39 (d,  $J = 8.3$  Hz, 2H), 7.16 (t,  $J = 9.3$  Hz, 2H), 6.90 (t,  $J = 8.9$  Hz, 2H), 6.61 (d,  $J = 16.1$  Hz, 1H), 6.38 (d,  $J = 16.0$  Hz, 1H), 5.48 (s, 1H), 5.10 (t,  $J = 8.3$  Hz, 1H), 4.40 – 4.28 (m, 2H), 2.08 (d,  $J = 1.4$  Hz, 3H), 2.06 – 1.91 (m, 2H), 1.86 – 1.76 (m, 1H), 1.70 – 1.55 (m, 11H), 1.46 – 1.36 (m, 1H), 1.25 (m,  $J = 16.4, 6.7$  Hz, 1H), 0.97 (d,  $J = 6.5$  Hz, 3H).

$^{13}\text{C}\{^1\text{H}\}$  NMR (100 MHz,  $\text{CDCl}_3$ )  $\delta$  166.46, 152.74, 141.16, 135.15, 131.40, 129.79, 129.37, 129.26, 129.13, 127.78, 126.47, 124.58, 124.20, 123.54, 122.76, 120.86, 116.24, 77.26, 63.50, 37.00, 35.51, 29.58, 27.57, 25.74, 25.41, 19.53, 18.09, 17.69.

HRMS (ESI-TOF)  $m/z$   $[\text{M} + \text{H}]^+$  calcd for  $\text{C}_{30}\text{H}_{37}\text{O}_3$  445.2737, found 445.2732.

*(E)*-2-(hept-1-en-1-yl)-4-methyl-2-(4-methylbenzyl)-2H-chromene (10 h)

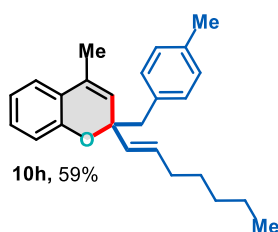

40.8 mg, 59 %, colorless liquid.

$^1\text{H NMR}$  (500 MHz,  $\text{CDCl}_3$ )  $\delta$  7.21 – 7.03 (m, 6H), 6.88 (dd,  $J = 12.2, 7.6$  Hz, 2H), 5.67 – 5.56 (m, 1H), 5.53 – 5.41 (m, 2H), 3.04 (d,  $J = 13.5$  Hz, 1H), 2.99 (d,  $J = 13.5$  Hz, 1H), 2.34 (s, 3H), 2.04 (s, 3H), 1.99 (dd,  $J = 14.2, 7.1$  Hz, 2H), 1.32 – 1.25 (m, 5H), 1.17 (m, 1H), 0.87 (t,  $J = 7.2$  Hz, 3H).

$^{13}\text{C}\{^1\text{H}\}$  NMR (125 MHz,  $\text{CDCl}_3$ )  $\delta$  152.89, 135.69, 133.23, 131.84, 131.64, 130.83, 128.93, 128.73, 128.41, 124.06, 123.30, 123.24, 120.43, 116.32, 79.62, 46.39, 32.25, 31.22, 28.72, 22.49, 21.07, 18.09, 14.02.

HRMS (ESI-TOF)  $m/z$   $[\text{M} + \text{H}]^+$  calcd for  $\text{C}_{25}\text{H}_{31}\text{O}$  347.2369, found 347.2379.

**(E)-2-isobutyl-4-methyl-2-(4-methylstyryl)-2H-chromene(10i)**

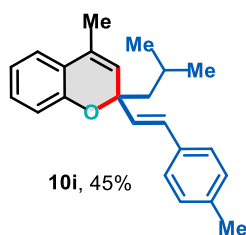

28.62 mg, 45 %, colorless liquid.

$^1\text{H NMR}$  (500 MHz,  $\text{CDCl}_3$ )  $\delta$  7.25 (d,  $J = 8.1$  Hz, 2H), 7.16 (d,  $J = 7.7$  Hz, 2H), 7.10 (d,  $J = 8.0$  Hz, 2H), 6.91 – 6.86 (m, 2H), 6.55 (d,  $J = 16.0$  Hz, 1H), 6.14 (d,  $J = 16.0$  Hz, 1H), 5.47 (s, 1H), 2.33 (s, 3H), 2.09 (s, 3H), 2.01 (m, 1H), 1.75 (d,  $J = 6.1$  Hz, 2H), 1.00 (d,  $J = 6.7$  Hz, 3H), 0.97 (d,  $J = 6.7$  Hz, 3H).

$^{13}\text{C}\{^1\text{H}\}$  NMR (125 MHz,  $\text{CDCl}_3$ )  $\delta$  152.96, 142.61, 137.21, 134.13, 131.60, 129.14, 129.02, 128.49, 128.45, 126.41, 124.29, 123.36, 120.39, 116.13, 80.35, 49.23, 24.43, 24.37, 24.20, 21.14, 18.13.

HRMS (ESI-TOF)  $m/z$   $[\text{M} + \text{H}]^+$  calcd for  $\text{C}_{23}\text{H}_{27}\text{O}$  319.2056, found 319.2068.

**Functionalization:**

To a solution of **7g** (50 mg, 0.10mmol) in MeOH (2 mL) was added Pd/C (10 mol%) and  $\text{H}_2$  gas was bubbled from a balloon at room temperature. After 10 h, mixture was diluted with DCM and filtered through a pad of celite bad. The combined organic phase was dried with  $\text{Na}_2\text{SO}_4$ . After removal of the solvent under reduced pressure, the residue was purified by column chromatography (silica gel mesh100-200; hexane: ethyl acetate; 80:20) to give the product **8** (41 mg, 82% yield).

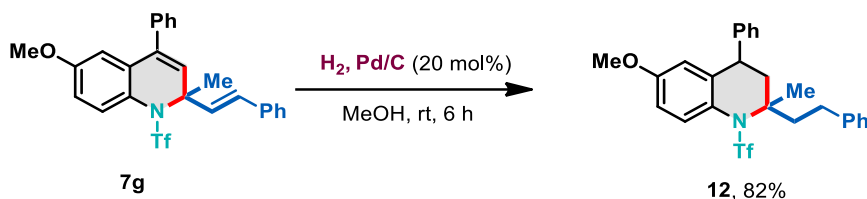

$^1\text{H NMR}$  (400 MHz,  $\text{CDCl}_3$ )  $\delta$  7.39 (d,  $J = 8.9$  Hz, 1H), 7.33 (t,  $J = 7.4$  Hz, 2H), 7.28 – 7.23 (m, 2H), 7.22 – 7.15 (m, 4H), 6.92 (d,  $J = 7.4$  Hz, 2H), 6.82 (dd,  $J = 9.0, 2.8$  Hz, 1H), 6.45 (d,  $J = 2.6$  Hz, 1H), 4.13 (t,  $J = 9.8$  Hz, 1H), 3.69 (s, 3H), 2.76 (td,  $J = 12.9, 5.1$  Hz, 1H), 2.58 (td,  $J = 12.8, 3.8$  Hz, 1H), 2.49 – 2.38 (m, 1H), 2.28 (dd,  $J = 14.5, 8.7$  Hz, 1H), 1.97 (t,  $J = 15.1$  Hz, 1H), 1.82 (s, 3H), 1.62 – 1.58 (m, 1H).

$^{13}\text{C}\{^1\text{H}\}$  NMR (100 MHz,  $\text{CDCl}_3$ )  $\delta$  158.34, 144.47, 141.24, 136.38, 129.08, 128.97, 128.48, 128.36, 128.24, 126.86, 126.07, 121.17-119.02 (q,  $J = 326.0$  Hz) 114.71, 112.89, 66.01, 55.38, 46.38, 42.22, 41.20, 30.02, 25.08.

HRMS (ESI-TOF)  $m/z$   $[\text{M} + \text{Na}]^+$  calcd for  $\text{C}_{26}\text{H}_{26}\text{F}_3\text{NNaO}_3\text{S}$  512.1478 found 512.1470.



**(E)-2,4-dimethyl-2-(2-(phenylethynyl)styryl)-1-((trifluoromethyl)sulfonyl)-1,2-dihydroquinoline**

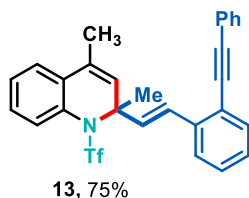

73.5 mg, 75 %, colorless liquid.

**<sup>1</sup>H NMR (400 MHz, CDCl<sub>3</sub>)** δ 7.55 (dd, *J* = 7.8, 1.8 Hz, 2H), 7.49 (d, *J* = 7.0 Hz, 1H), 7.43 (m, 4H), 7.37 (d, *J* = 7.9 Hz, 1H), 7.25 – 7.15 (m, 5H), 7.02 (d, *J* = 16.1 Hz, 1H), 6.20 (d, *J* = 16.1 Hz, 1H), 5.94 (s, 1H), 2.13 (s, 3H), 1.88 (s, 3H).

**<sup>13</sup>C{<sup>1</sup>H} NMR (100 MHz, CDCl<sub>3</sub>)** δ 137.73, 134.35, 133.13, 132.82, 132.44, 132.21, 131.58, 130.68, 128.67, 128.64, 128.59, 128.19, 128.06, 127.98, 127.80, 127.72, 125.28, 123.39, 123.23, 122.25, 122.08 (q, *J* = 325.8 Hz) 94.23, 87.62, 64.59, 26.68, 17.98.

**HRMS (ESI-TOF) *m/z* [M + K]<sup>+</sup>** calcd for C<sub>28</sub>H<sub>22</sub>F<sub>3</sub>KNO<sub>2</sub>S 532.0955, found 532.0944.

**(E)-2,4-dimethyl-2-(2-(phenylethynyl)styryl)-2H-chromene**

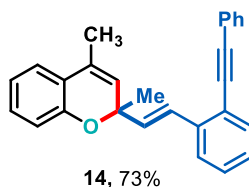

52.8 mg, 73 %, colorless liquid.

**<sup>1</sup>H NMR (500 MHz, CDCl<sub>3</sub>)** δ 7.55 (m, 3H), 7.51 (d, *J* = 7.8 Hz, 1H), 7.41 (m, 3H), 7.30 – 7.28 (m, 1H), 7.23 (m, 2H), 7.16 (d, *J* = 7.5 Hz, 1H), 7.10 (t, *J* = 7.7 Hz, 1H), 6.92 – 6.85 (m, 2H), 6.42 (d, *J* = 14.2 Hz, 1H), 5.55 (s, 1H), 2.08 (s, 3H), 1.69 (s, 3H).

**<sup>13</sup>C{<sup>1</sup>H} NMR (125 MHz, CDCl<sub>3</sub>)** δ 153.08, 138.44, 134.37, 133.08, 132.59, 131.76, 129.37, 129.25, 128.60, 128.55, 127.50, 127.29, 125.32, 124.71, 123.68, 123.62, 123.05, 122.38, 120.92, 116.49, 94.36, 88.05, 77.73, 27.95, 18.30.

**HRMS (ESI-TOF) *m/z* [M + H]<sup>+</sup>** calcd for C<sub>27</sub>H<sub>23</sub>O 363.1743, found 363.1755.

**Mechanistic Study:**

A sealed tube containing [Cp\*RhCl<sub>2</sub>]<sub>2</sub> (2.5 mol %), NaOAc (30 mol%) was evacuated and purged with nitrogen gas three times. Then, *o*-alkenylanilides **1** (0.20 mmol) and allenic acetate **2** (0.30 mmol) in DCE (2 ml) were added via syringe under nitrogen atmosphere and the reaction mixture was allowed to stir at rt for 24 h. Then, the mixture diluted with CH<sub>2</sub>Cl<sub>2</sub> (10 mL). The mixture was filtered through a Celite pad and washed with CH<sub>2</sub>Cl<sub>2</sub> (3 × 10 mL). The filtrate was concentrated under reduced pressure.

The residue was purified by silica gel column chromatography using hexane/ethyl acetate as eluent to afford recovered substrate **1a**.

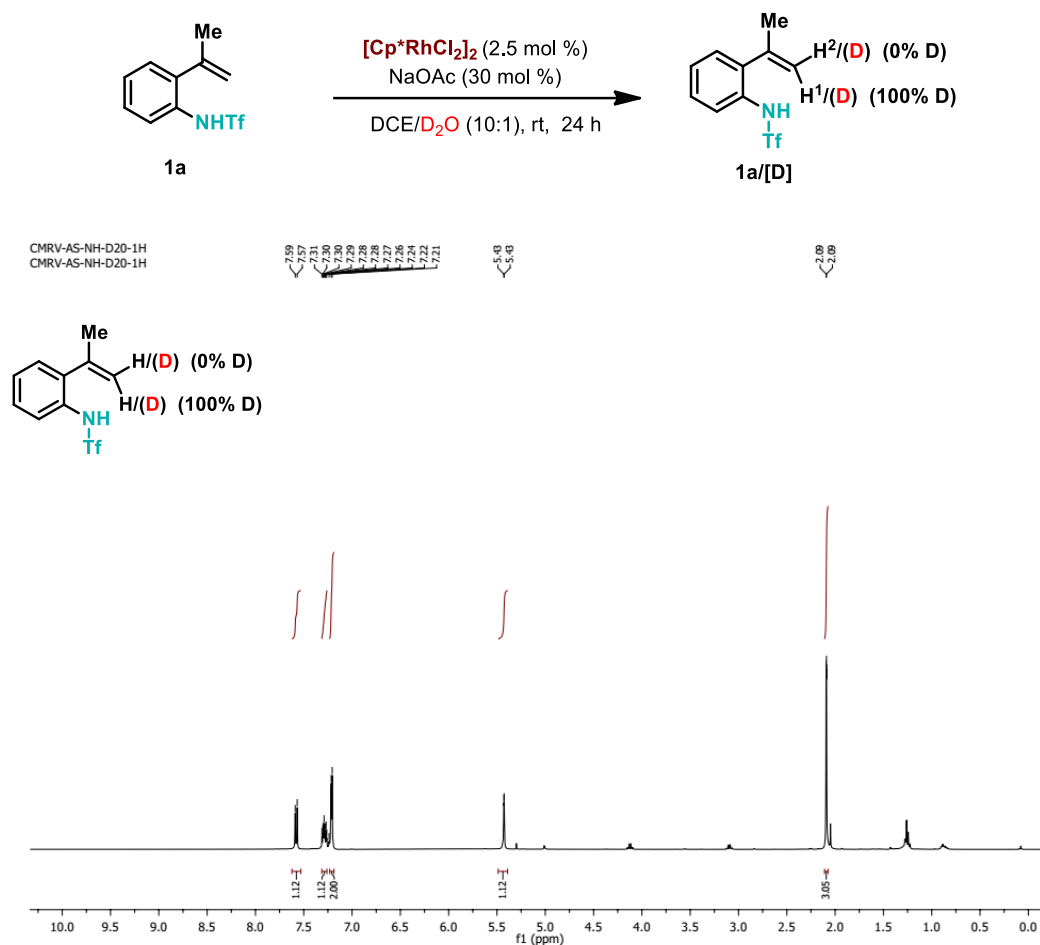

A sealed tube containing  $[\text{Cp}^*\text{RhCl}_2]_2$  (2.5 mol %), NaOAc (30 mol%) was evacuated and purged with nitrogen gas three times. Then, *o*-alkenylanilides **1** (0.20 mmol) and allenic acetate **2** (0.30 mmol) in  $\text{CH}_3\text{CN}$  (2 mL) were added via syringe under nitrogen atmosphere and the reaction mixture was allowed to stir at rt for 24 h. Then, the mixture diluted with  $\text{CH}_2\text{Cl}_2$  (10 mL). The mixture was filtered through a Celite pad and washed with  $\text{CH}_2\text{Cl}_2$  ( $3 \times 10$  mL). The filtrate was concentrated under reduced pressure. The residue was purified by silica gel column chromatography using hexane/ethyl acetate as eluent to afford annulated product **3a**.

b) H/D exchange study

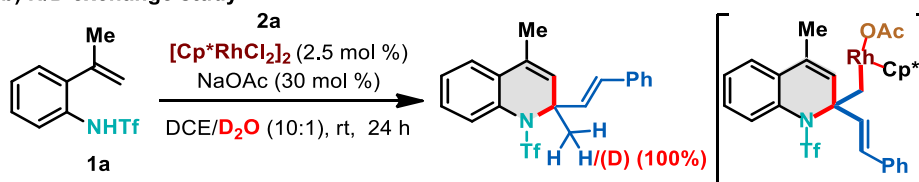

CMRV-AS-NH-ALLENE-D20-1H  
 CMRV-AS-NH-ALLENE-D20-1H

7.52  
 7.51  
 7.50  
 7.34  
 7.32  
 7.29  
 7.28  
 7.26  
 7.25  
 7.23  
 7.21  
 7.19  
 6.40  
 6.36  
 6.13  
 6.09  
 5.92

2.20  
 1.83  
 1.82

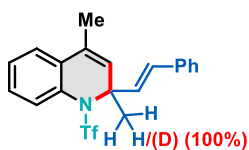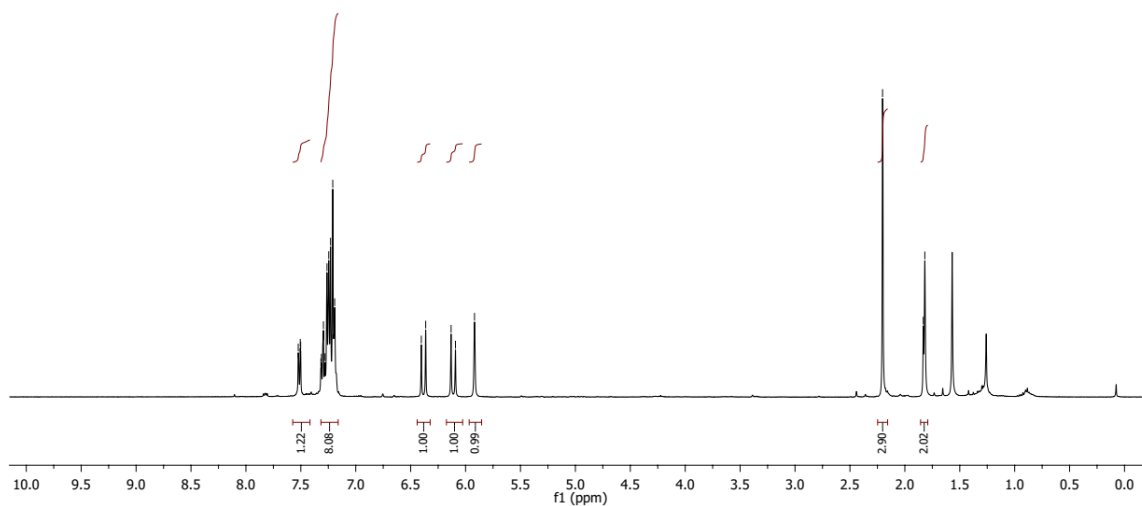

**Competitive experiment:** A sealed tube containing  $[\text{Cp}^*\text{RhCl}_2]_2$  (2.5 mol %), NaOAc (30 mol%) was evacuated and purged with nitrogen gas three times. Then, *o*-alkenylanilides **1g** (0.10 mmol) and **1l** (0.10 mmol) and allenic acetate **2a** (0.12 mmol) in  $\text{CH}_3\text{CN}$  (2 ml) were added via syringe under nitrogen atmosphere and the reaction mixture was allowed to stir at rt for 1 h. Then, the mixture diluted with  $\text{CH}_2\text{Cl}_2$  (10 mL). The mixture was filtered through a Celite pad and washed with  $\text{CH}_2\text{Cl}_2$  ( $3 \times 10$  mL). The filtrate was concentrated under reduced pressure and crude NMR of mixture on recorded.

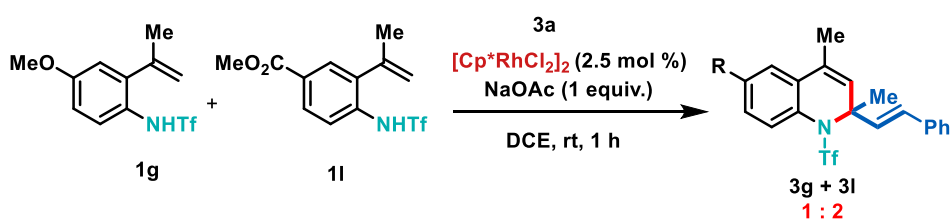

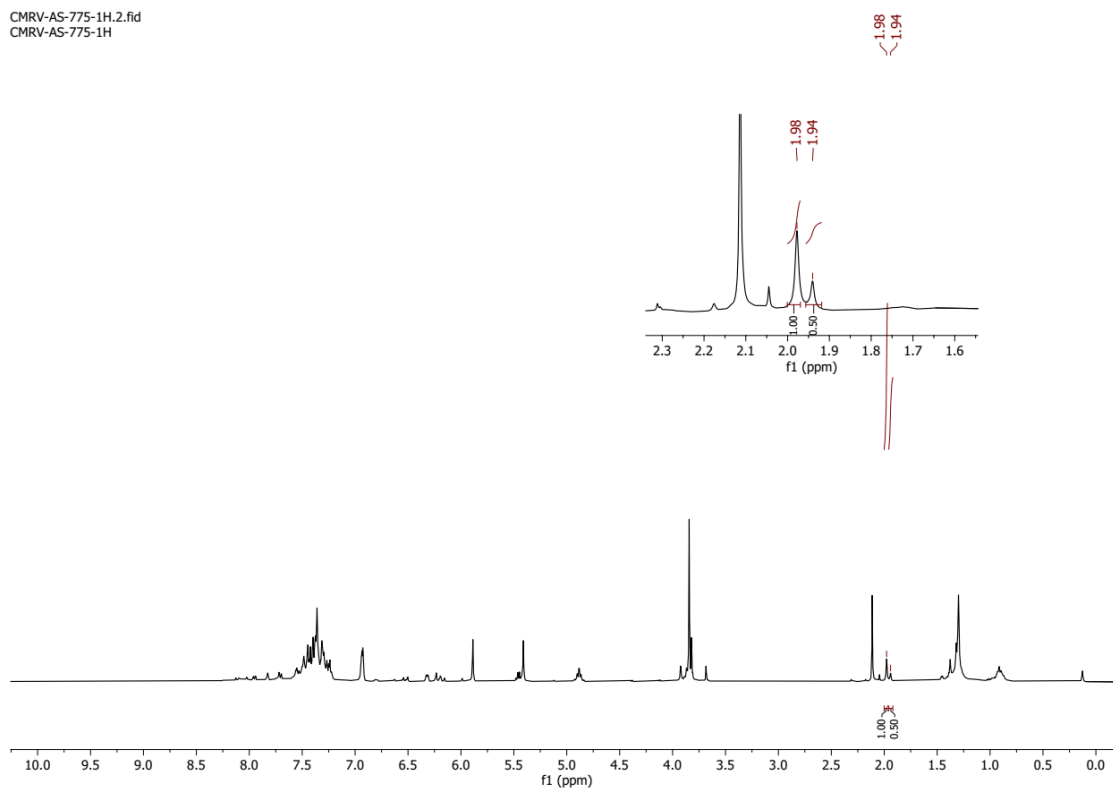

## Refereneces:

1. (a) Font, M.; Cendon, B.; Seoane, A.; Mascarenas, J. L.; Gulias, M. *Angew. Chem. Int. Ed.* **2018**, *57*, 8255–8259. (b) Andres Seoane, Cezar Comanescu, Noelia Casanova, Rebeca Garcia-Fandino, Xabier Diz, Jose L. Mascarenas, Moises Gulias. *Angew. Chem. Int. Ed.* **2019**, *58*, 1700–1704.
2. Chen, P.; Nan, J.; Hu, Y.; Ma, Q.; Ma, Y. *Org. Lett.* **2019**, *21*, 4812-4815.
3. Shukla, R. K, Nair, A. M.; Khan, S.; Volla, C. M. R. Cobalt-Catalyzed C8-Dienylation of Quinoline-N-Oxides. *Angew.Chem.Int. Ed.* **2020**, *59*, 17042–17048.

cmrv-as-412-1h  
cmrv-as-412-1h

2.25  
2.04  
1.08

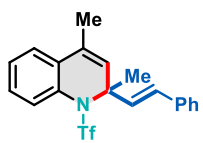

7a, 91%

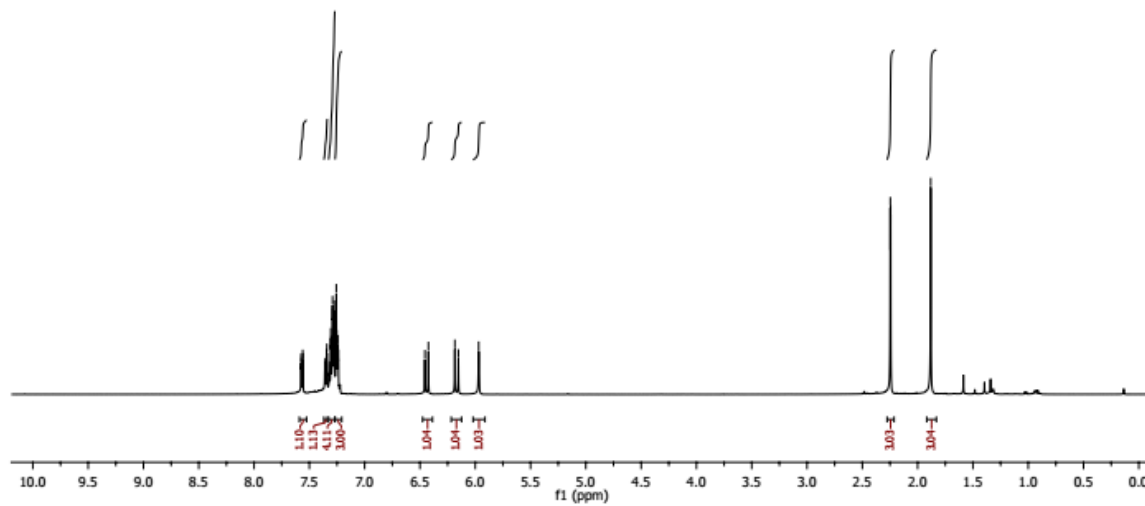

cmrv-as-412-13c  
cmrv-as-412-13c

134.14  
134.27  
131.67  
131.17  
131.27  
130.68  
129.61  
129.05  
128.06  
127.93  
127.89  
127.72  
126.59  
123.09  
121.66  
118.07

64.29

26.56

17.95

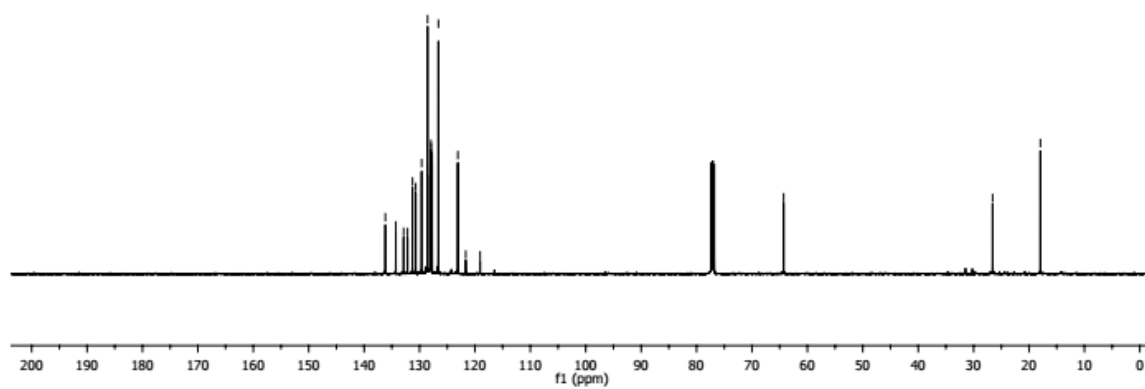

CMRV-AS-493-1H  
CMRV-AS-493-1H

7.56  
7.55  
7.54  
7.54  
7.54  
7.54  
7.32  
7.32  
7.27  
7.27  
7.26  
7.25  
7.24  
7.24  
7.21  
7.21  
7.20  
6.37  
6.37  
6.14  
6.10  
5.99

1.06  
1.24  
1.22  
1.20

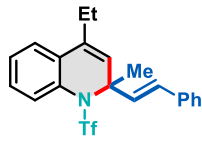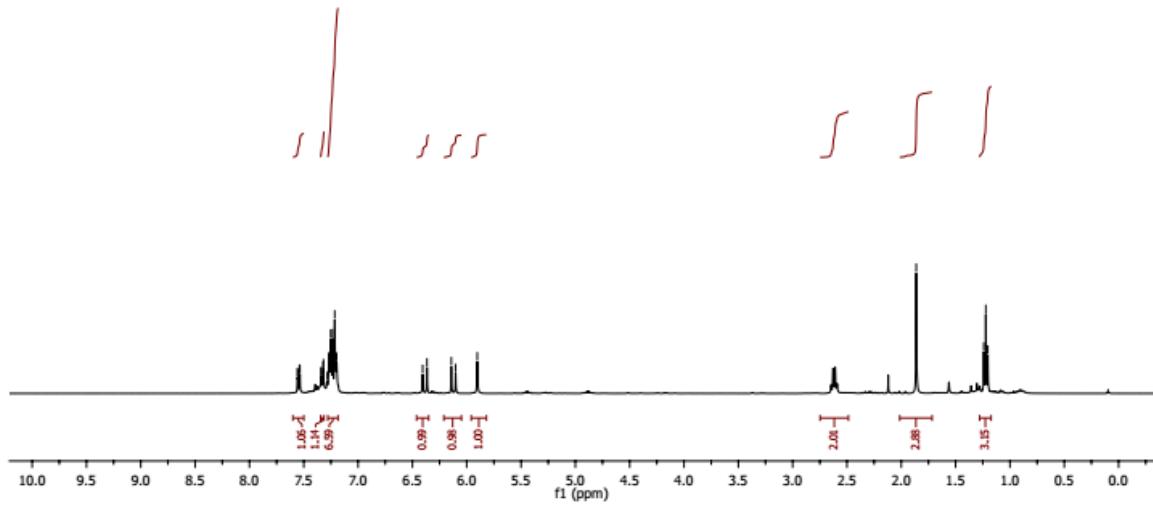

CMRV-AS-493-13C  
CMRV-AS-493-13C

138.07  
136.96  
136.82  
131.45  
131.33  
129.40  
128.92  
128.82  
127.90  
127.80  
126.57  
122.85  
121.96  
118.92

61.24

26.63

24.45

12.56

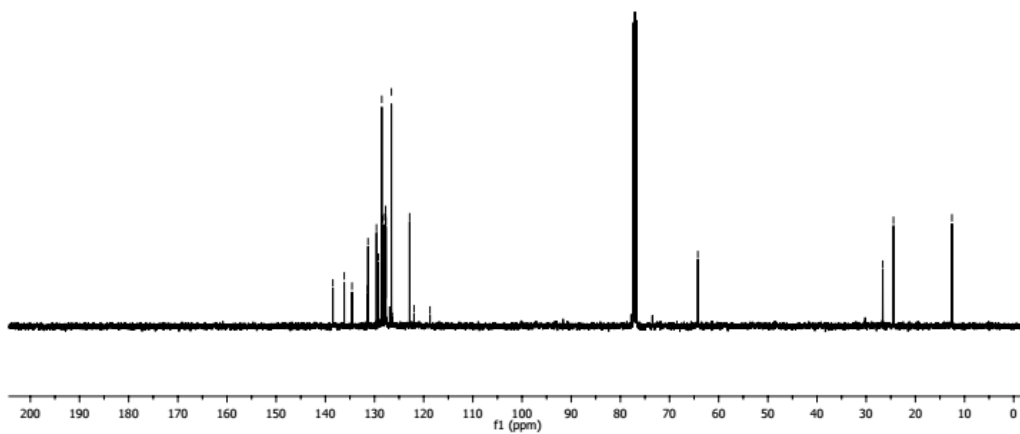

CMRV-AS-644-1H  
CMRV-AS-644-1H

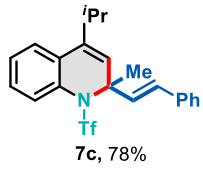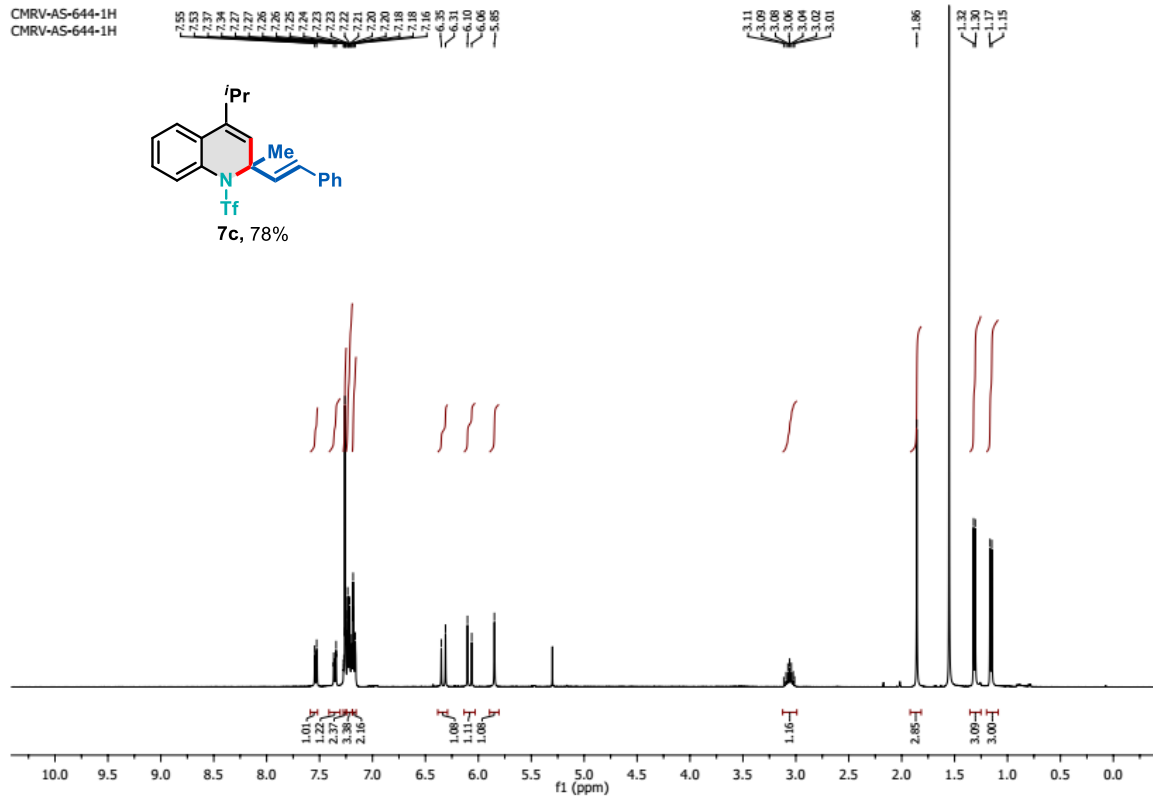

CMRV-AS-644-13C  
CMRV-AS-644-13C

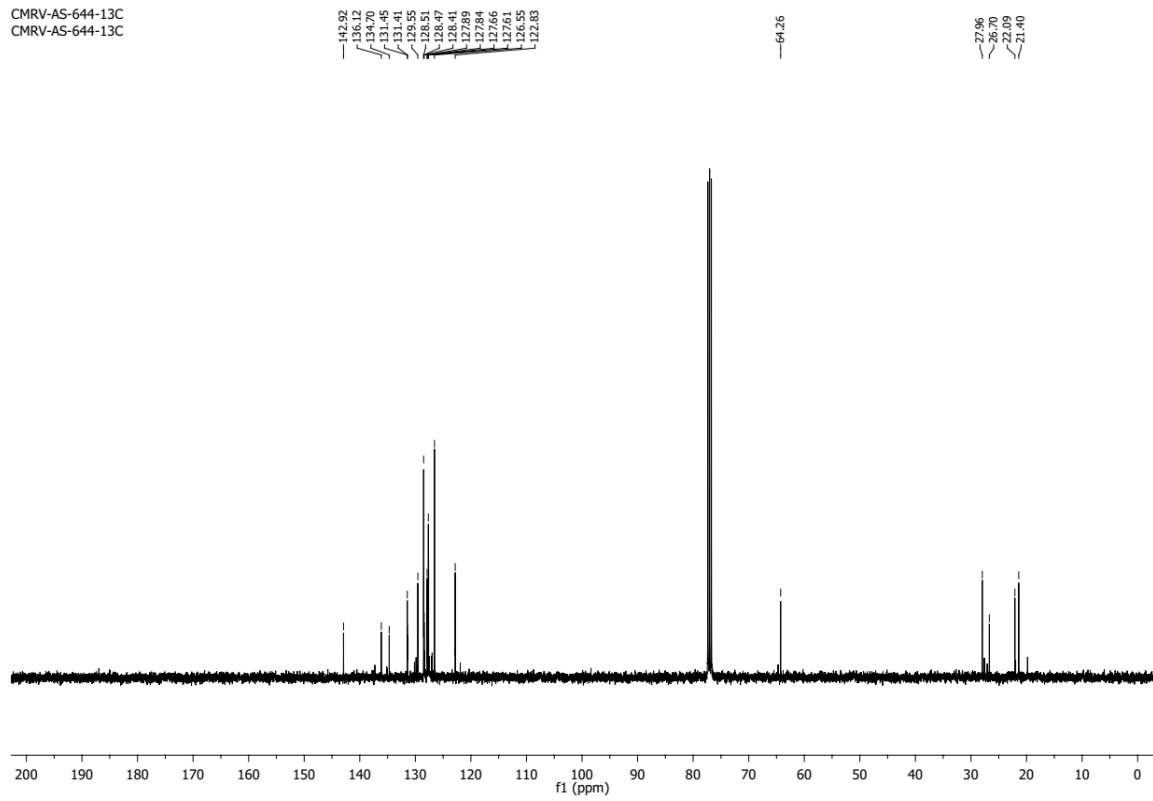

CMRV-AS-643-1H  
CMRV-AS-643-1H

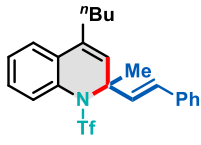

7d, 82%

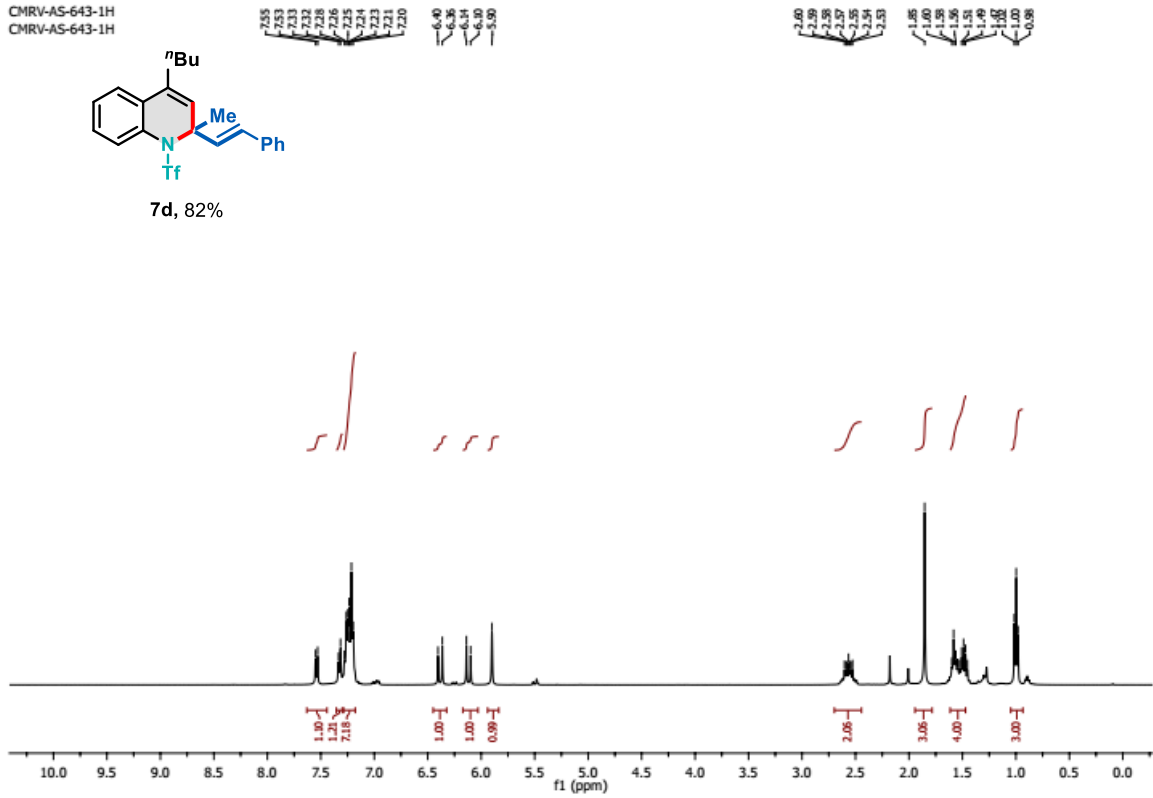

CMRV-AS-643-13C  
CMRV-AS-643-13C

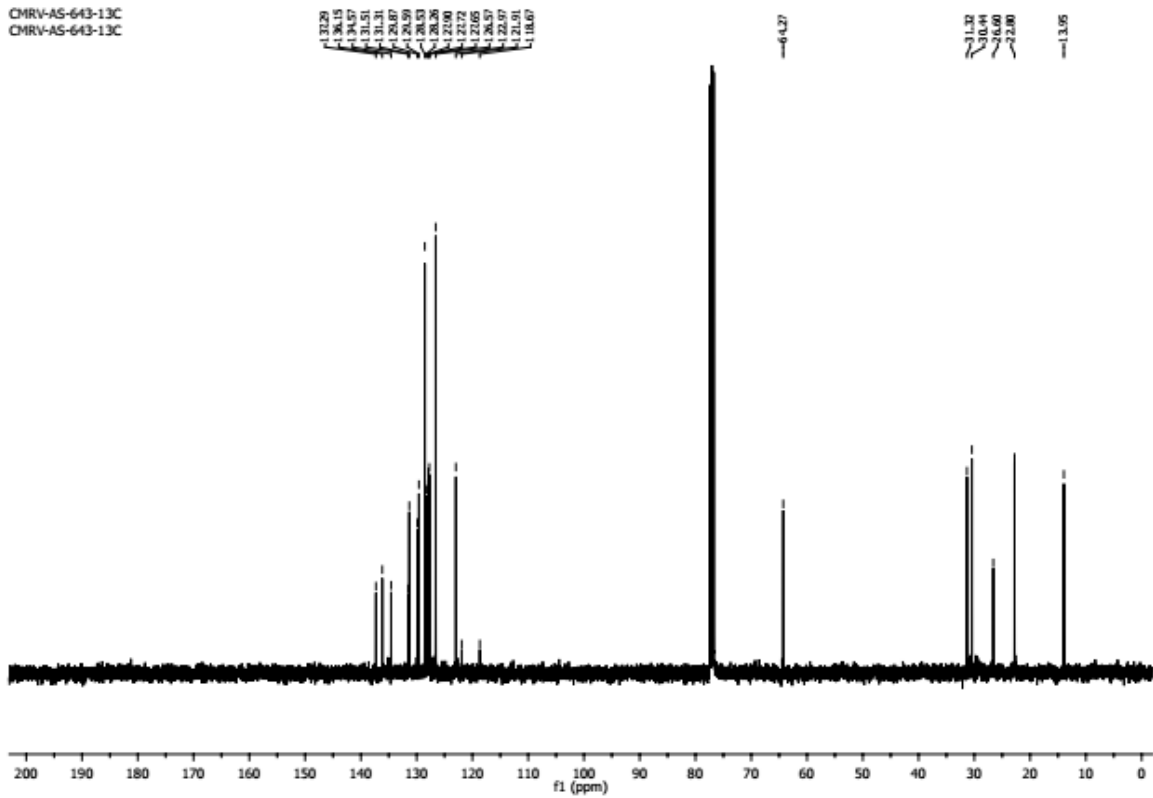



130.06  
 129.90  
 129.76  
 129.68  
 129.48  
 129.44  
 129.41  
 129.37  
 129.27  
 129.26  
 129.25  
 129.24  
 129.23  
 129.22  
 129.21  
 129.14  
 129.14  
 63.57  
 63.53  
 63.51  
 63.31  
 63.30

— 1.97

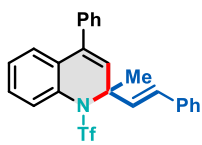

7e, 85%

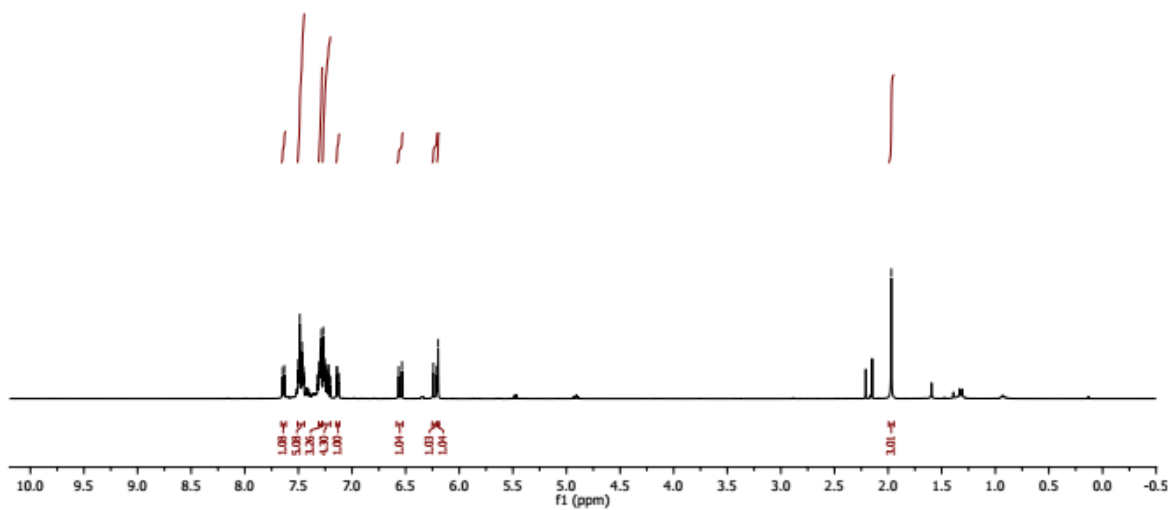

CMRV-AS-468-13C  
 CMRV-AS-468-13C

139.66  
 137.63  
 136.03  
 135.04  
 131.35  
 131.25  
 130.98  
 130.84  
 129.71  
 128.58  
 128.57  
 128.51  
 128.44  
 128.38  
 127.72  
 127.64  
 126.81  
 126.64  
 125.98  
 121.73  
 119.13

— 61.33

— 26.64

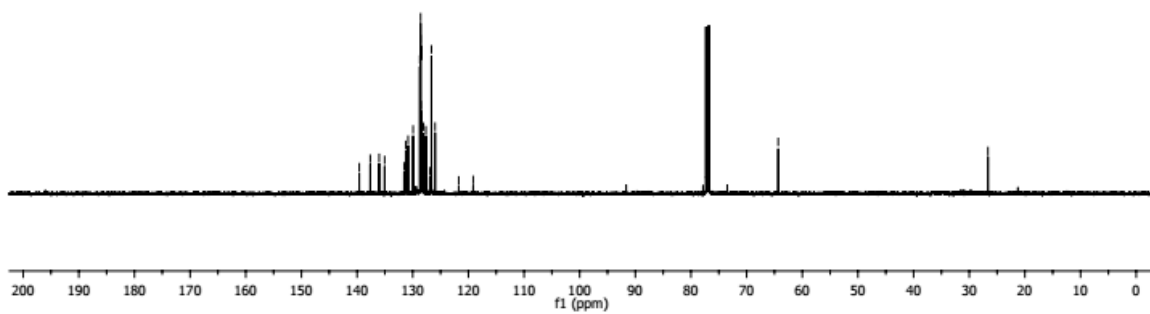

CMRV-AS-672-1H  
CMRV-AS-672-1H

7.51  
7.49  
7.47  
7.46  
7.45  
7.44  
7.43  
7.41  
7.39  
7.37  
7.25  
7.24  
7.23  
7.09  
7.08  
7.07  
6.89  
6.88  
6.35  
6.34  
6.15

2.24  
1.89

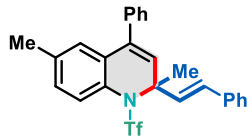

7f, 90 %

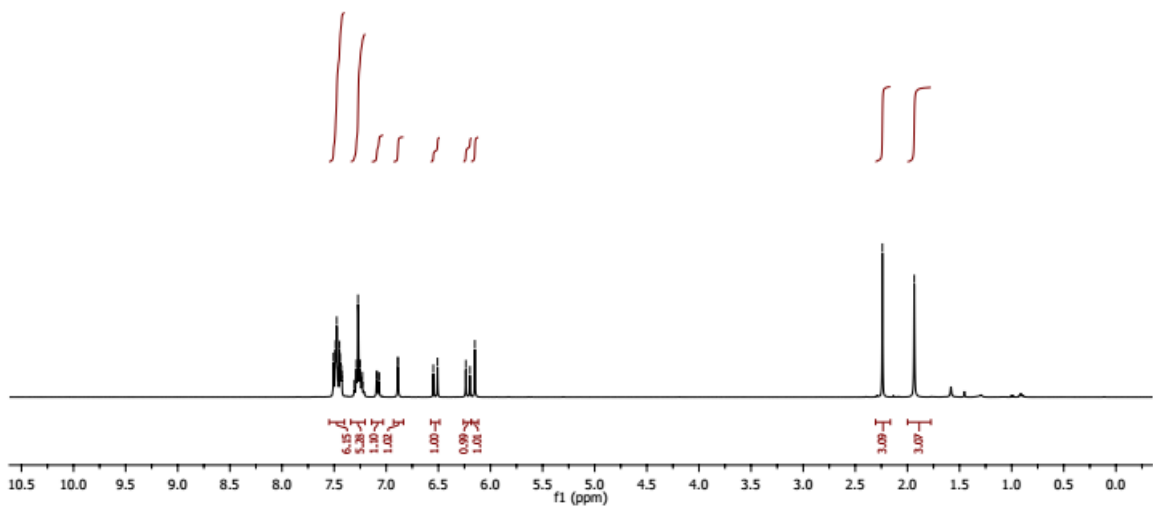

CMRV-AS-672-13C  
CMRV-AS-672-13C

139.66  
137.81  
136.59  
136.09  
132.47  
131.24  
131.20  
131.11  
129.71  
128.70  
128.59  
128.44  
128.18  
128.03  
126.67  
126.56  
123.08  
118.84

61.24

26.71  
21.17

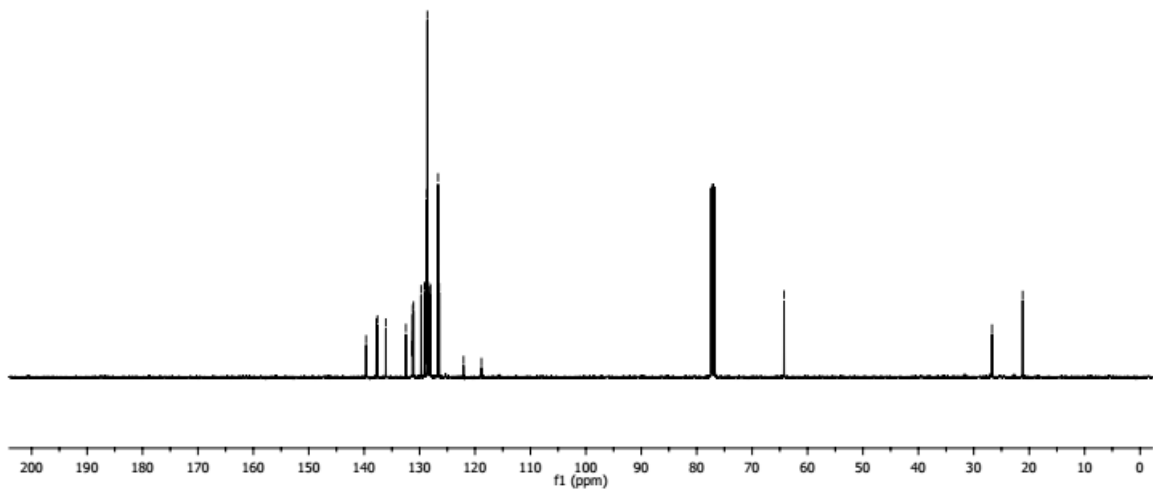

CMRV-AS-679-1H  
CMRV-AS-679-1H

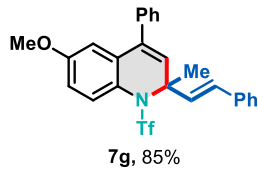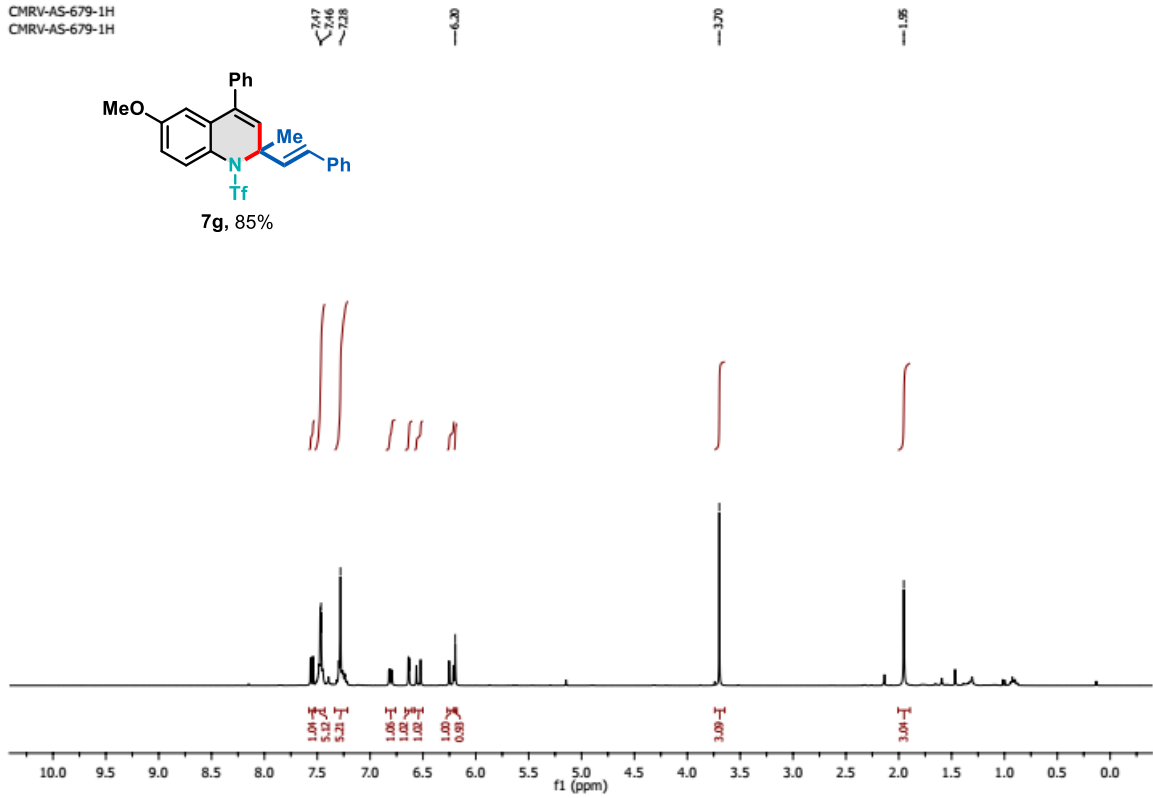

CMRV-AS-679-13C  
CMRV-AS-679-13C

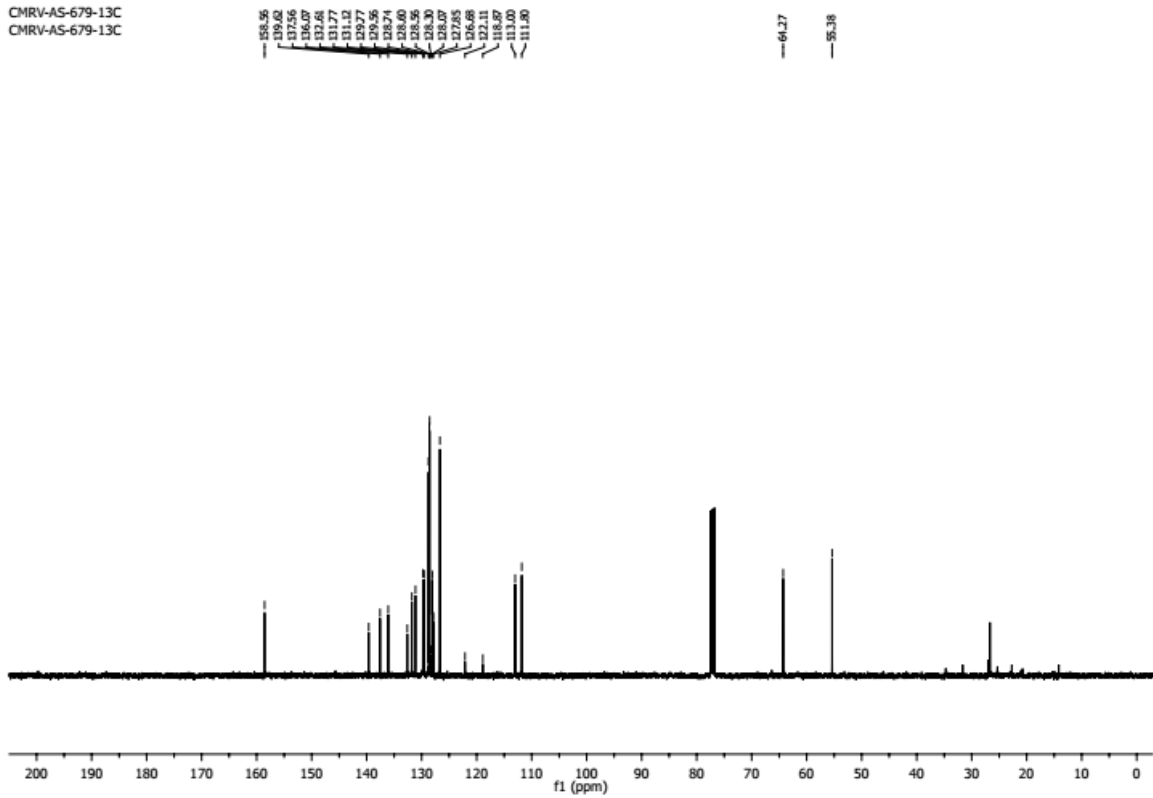

CMRV-AS-689-11  
 CMRV-AS-689-11

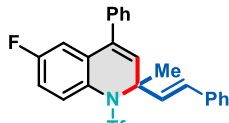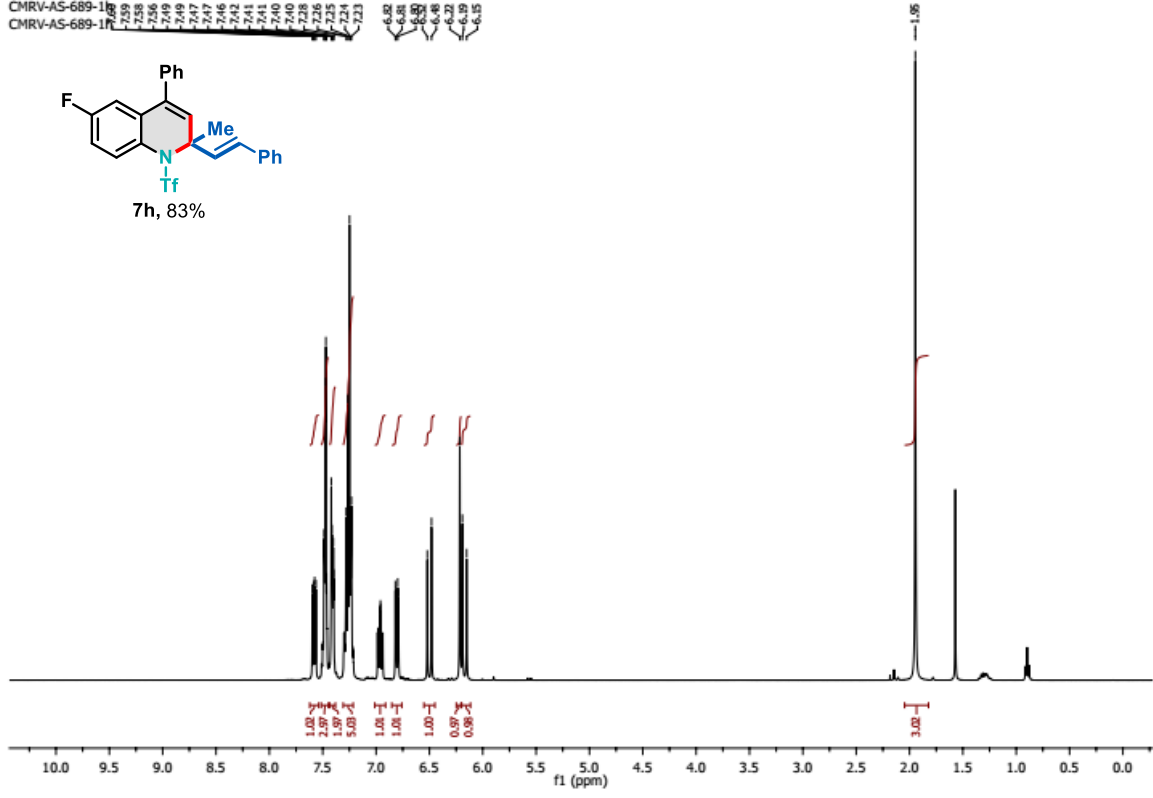

CMRV-AS-689-13C  
 CMRV-AS-689-13C

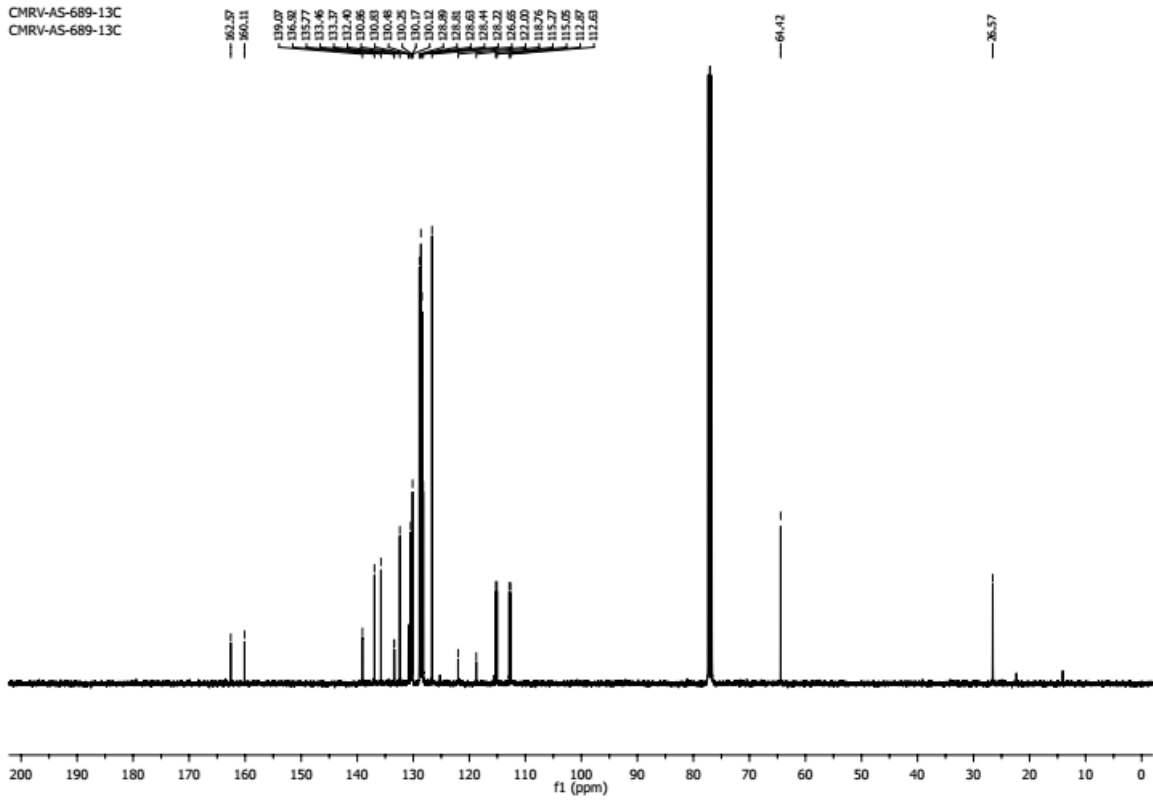

CMRV-AS-516-1H  
CMRV-AS-516-1H

7.57  
7.55  
7.51  
7.49  
7.46  
7.42  
7.41  
7.33  
7.30  
7.29  
7.25  
7.24  
7.09  
6.53  
6.21  
6.17

1.06

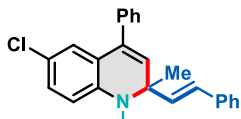

7i, 79%

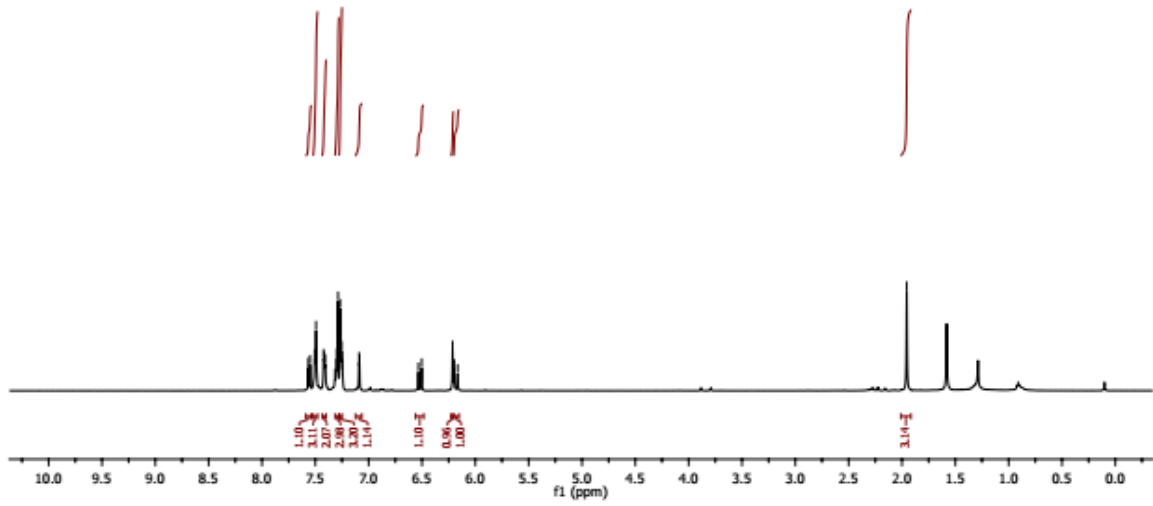

CMRV-AS-516-13C  
CMRV-AS-516-13C

138.85  
138.84  
133.72  
133.40  
133.47  
132.99  
132.51  
132.34  
132.31  
129.67  
128.91  
128.81  
128.63  
128.65  
128.32  
128.22  
128.67  
128.80  
121.62

61.4

26.38

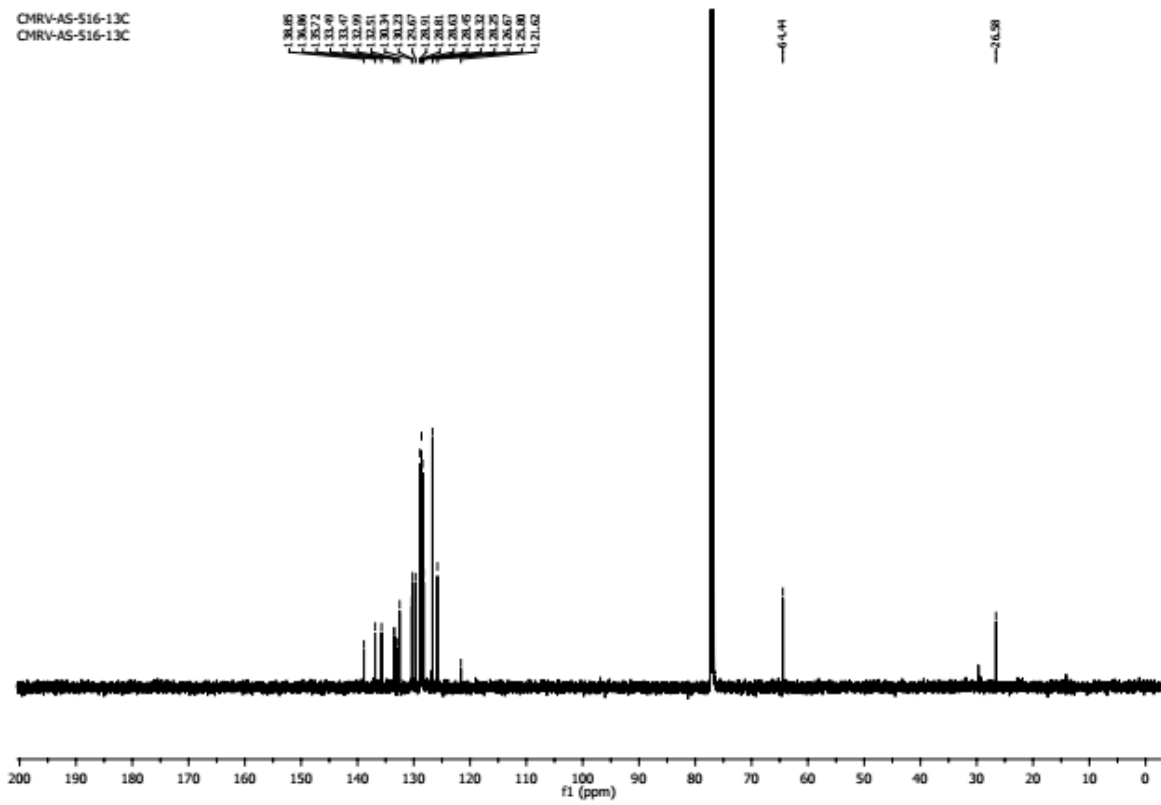

CMRV-AS-647-1H  
CMRV-AS-647-1H

7.50  
7.48  
7.47  
7.46  
7.45  
7.44  
7.43  
7.42  
7.41  
7.40  
7.39  
7.38  
7.37  
7.36  
7.35  
7.34  
7.33  
7.32  
7.31  
7.30  
6.33  
6.31  
6.29  
6.18  
6.16

1.04

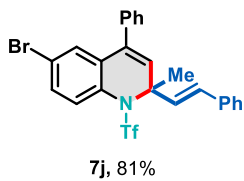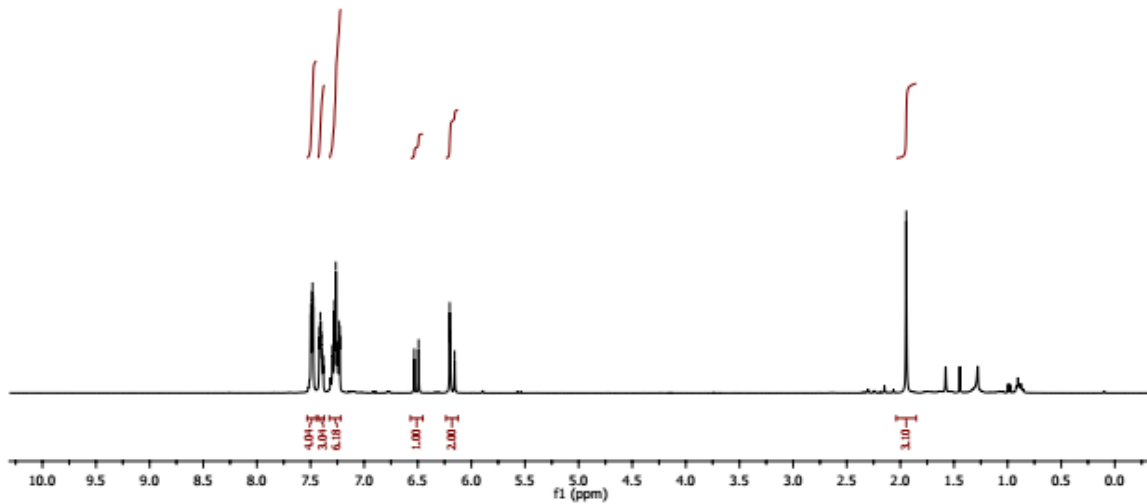

CMRV-AS-647-13C  
CMRV-AS-647-13C

138.276  
136.85  
135.71  
134.02  
133.30  
131.31  
131.31  
130.32  
129.55  
128.95  
128.91  
128.72  
128.66  
128.47  
128.28  
126.70  
121.91  
121.35  
118.70

61.42

26.61

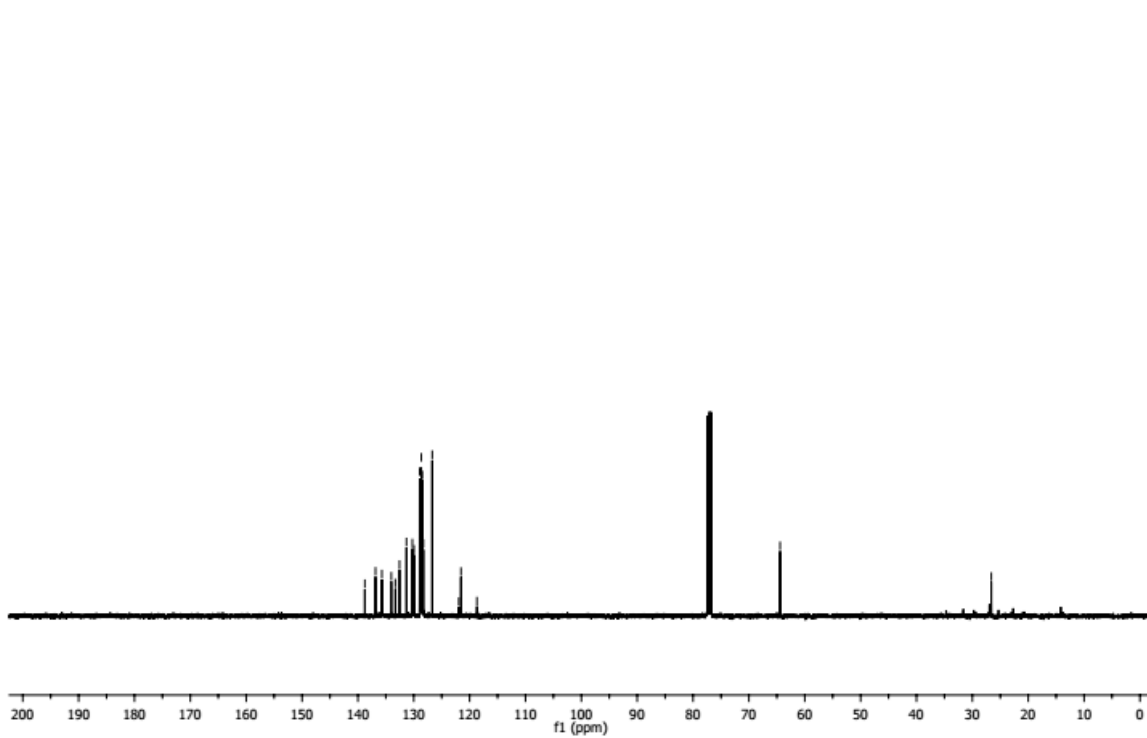

CMRV-AS-496-1H  
CMRV-AS-496-1H

7.43  
7.39  
7.36  
7.27  
7.26  
7.25  
7.23  
7.21  
6.40  
6.36  
6.12  
6.08  
5.97

2.19  
1.84

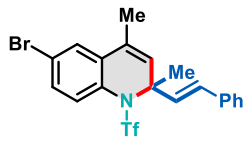

7k, 81%

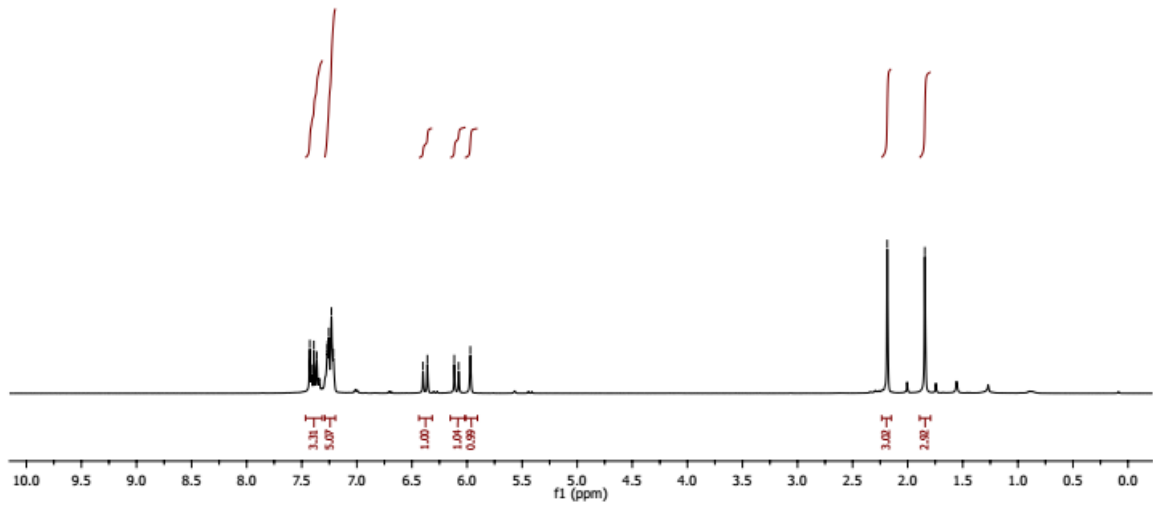

CMRV-AS-496-13C  
CMRV-AS-496-13C

135.85  
133.88  
133.38  
131.78  
131.68  
130.76  
129.93  
129.52  
128.64  
128.59  
128.42  
128.36  
126.89  
121.95  
118.64

64.37

26.50

17.84

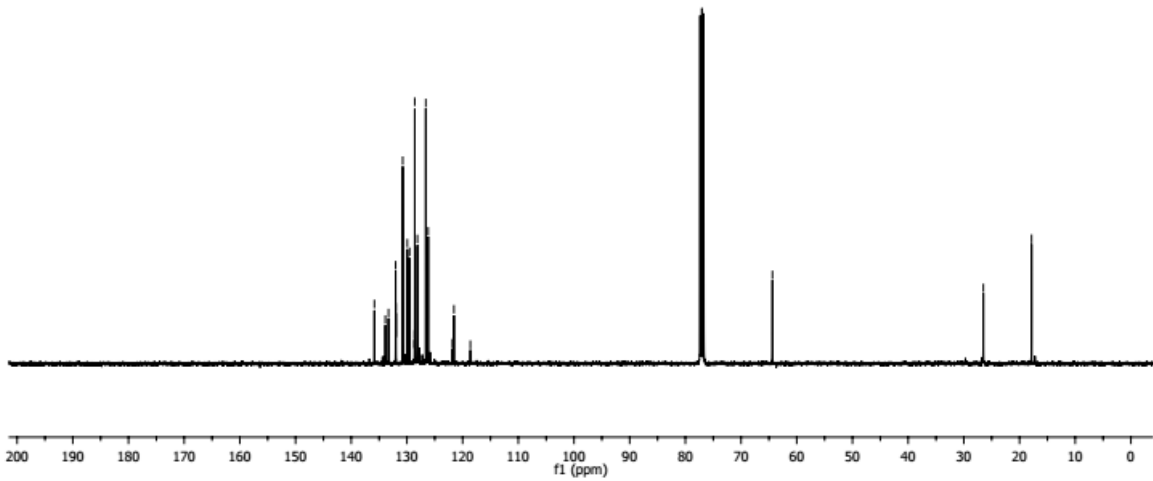

CMRV-AS-712-1H  
CMRV-AS-712-1H

7.97  
7.95  
7.83  
7.71  
7.70  
7.52  
7.51  
7.50  
7.44  
7.41  
7.29  
7.27  
7.22  
6.57  
6.49  
6.23  
6.18  
6.15

3.05

1.08

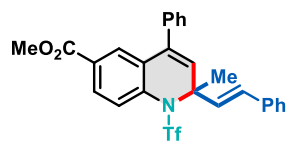

7I, 81%

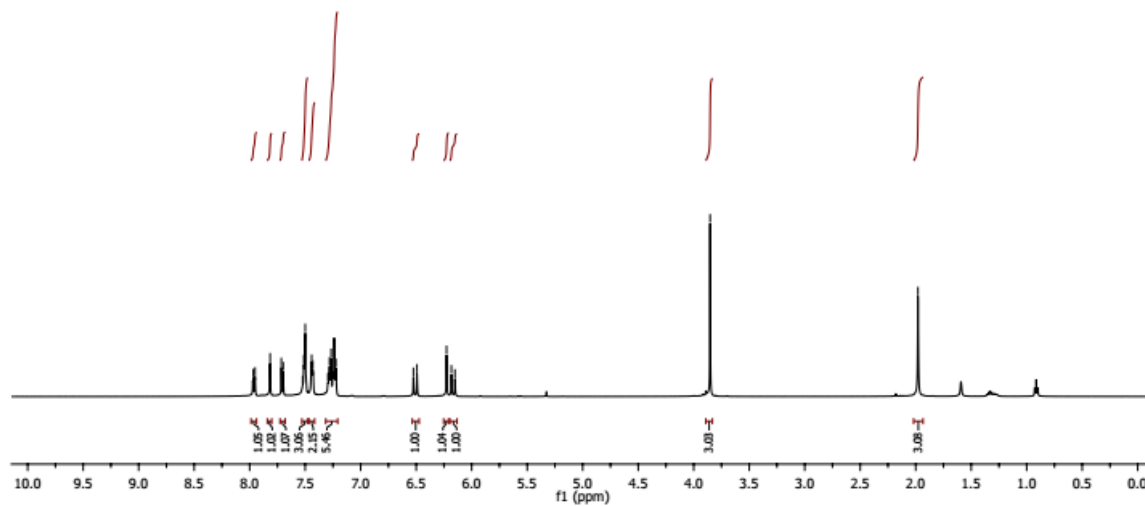

CMRV-AS-712-13C  
CMRV-AS-712-13C

166.02

139.28  
138.08  
137.01  
135.95  
133.03  
131.67  
130.34  
130.19  
129.39  
129.32  
128.93  
128.85  
128.60  
128.44  
128.24  
127.14  
126.66  
21.98  
18.08

61.68

51.10

26.59

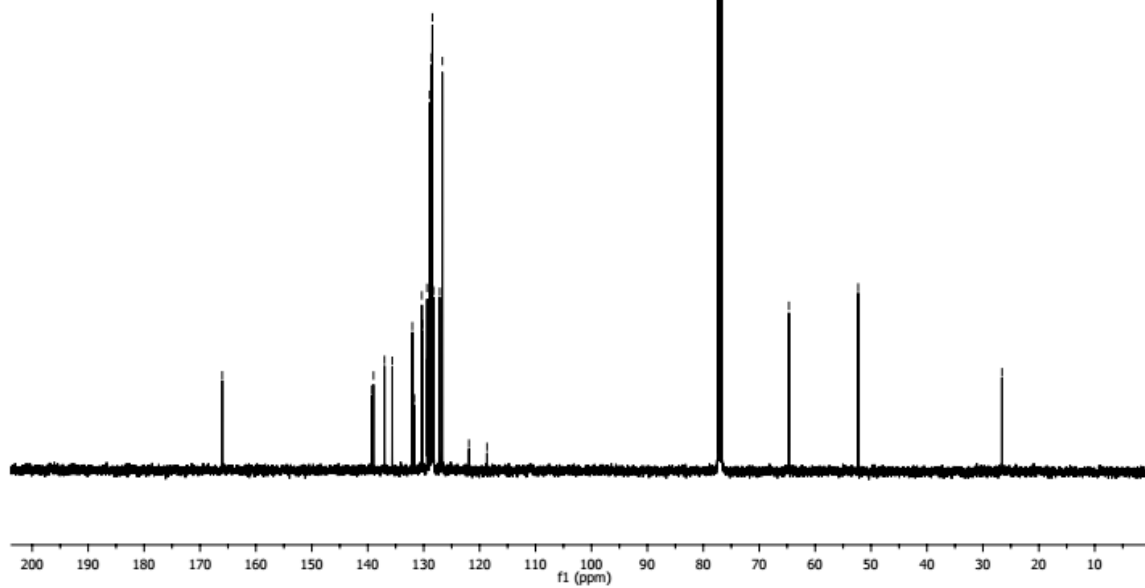



CMRV-AS-722-1H  
CMRV-AS-722-1H

7.51  
7.49  
7.48  
7.47  
7.29  
7.27  
7.25  
7.23  
7.21  
7.18  
7.16  
7.09  
7.06  
6.98  
6.85  
6.83  
6.21  
6.11  
6.08

2.07

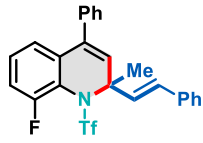

7m, 89%

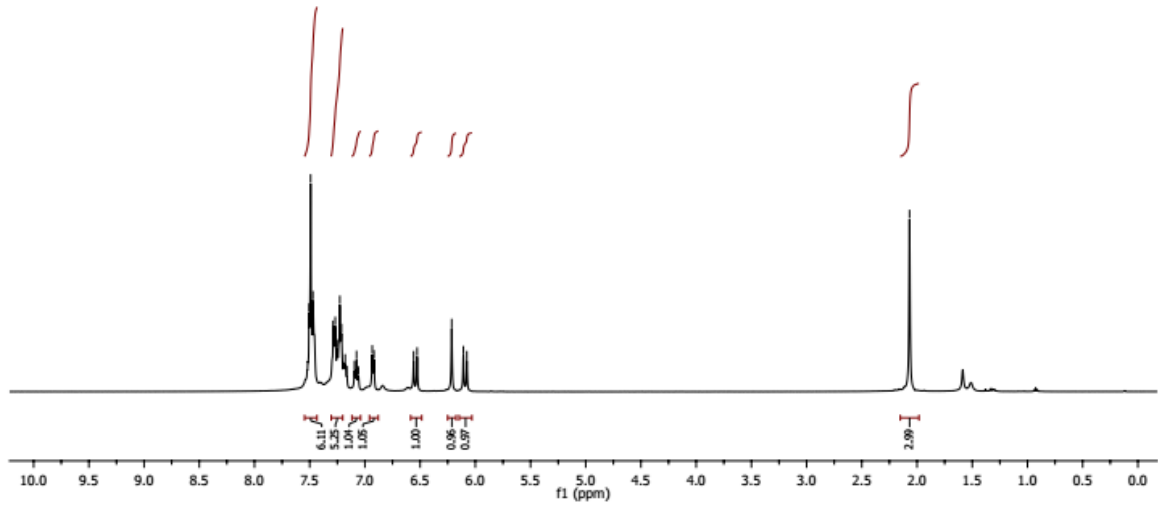

CMRV-AS-722-13C  
CMRV-AS-722-13C

138.95  
137.14  
136.70  
137.06  
135.71  
130.17  
130.17  
128.97  
128.90  
128.78  
128.73  
128.59  
128.16  
121.98  
116.72  
116.47

64.55

25.97

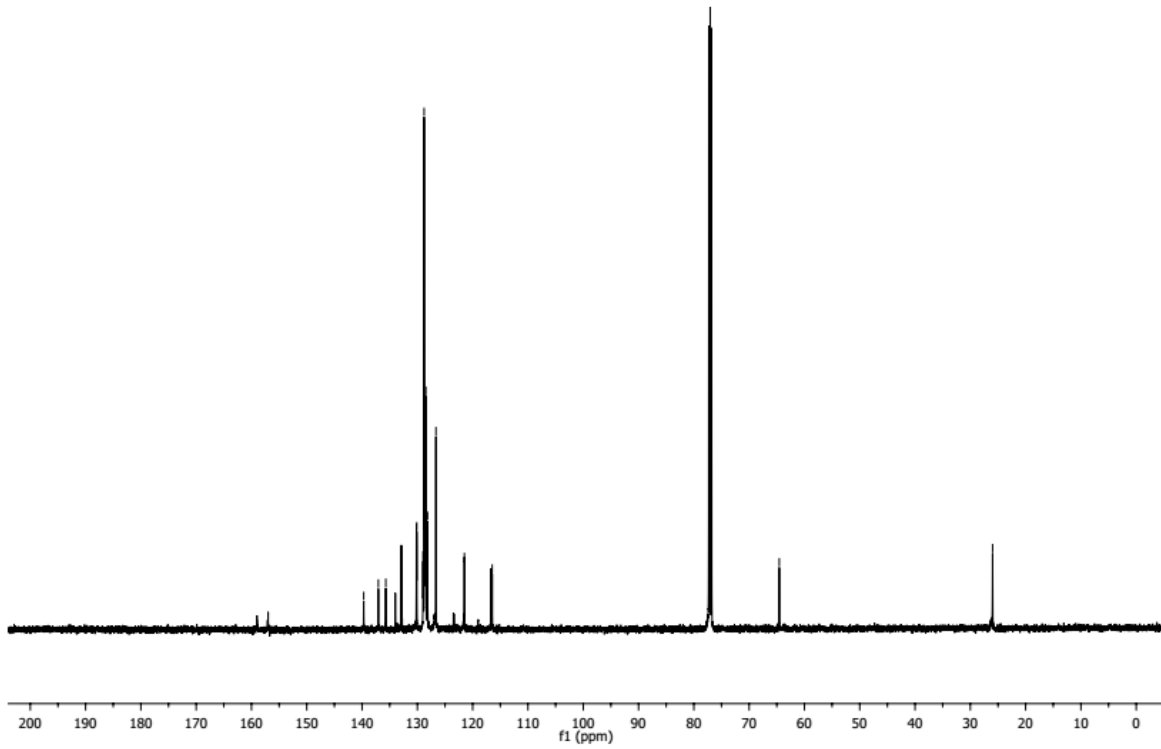

CMRV-AS-690-1H  
CMRV-AS-690-1H

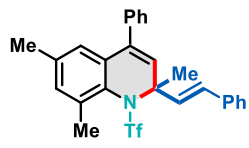

7n, 85%

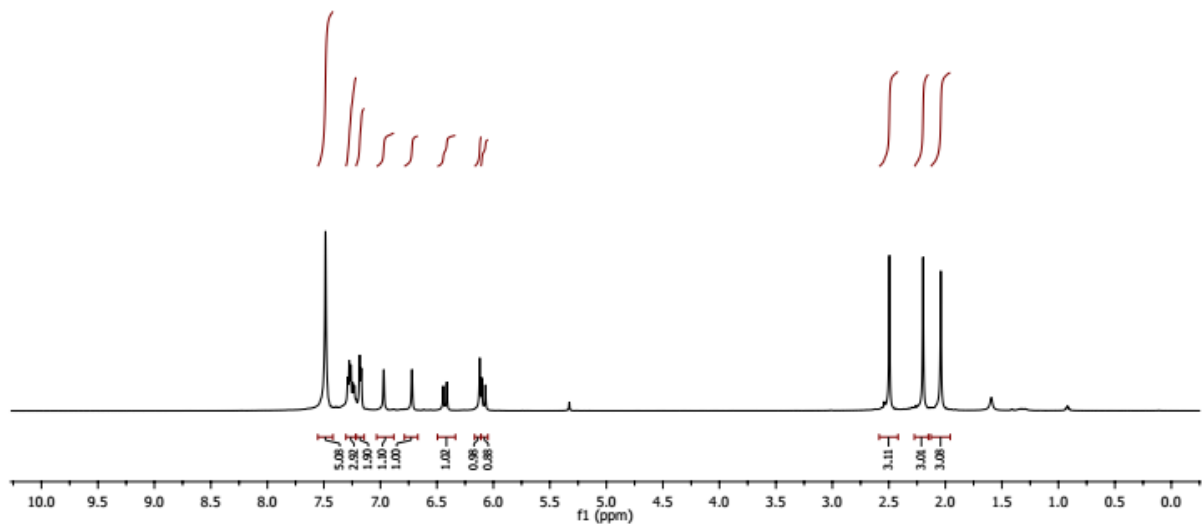

CMRV-AS-690-13C  
CMRV-AS-690-13C

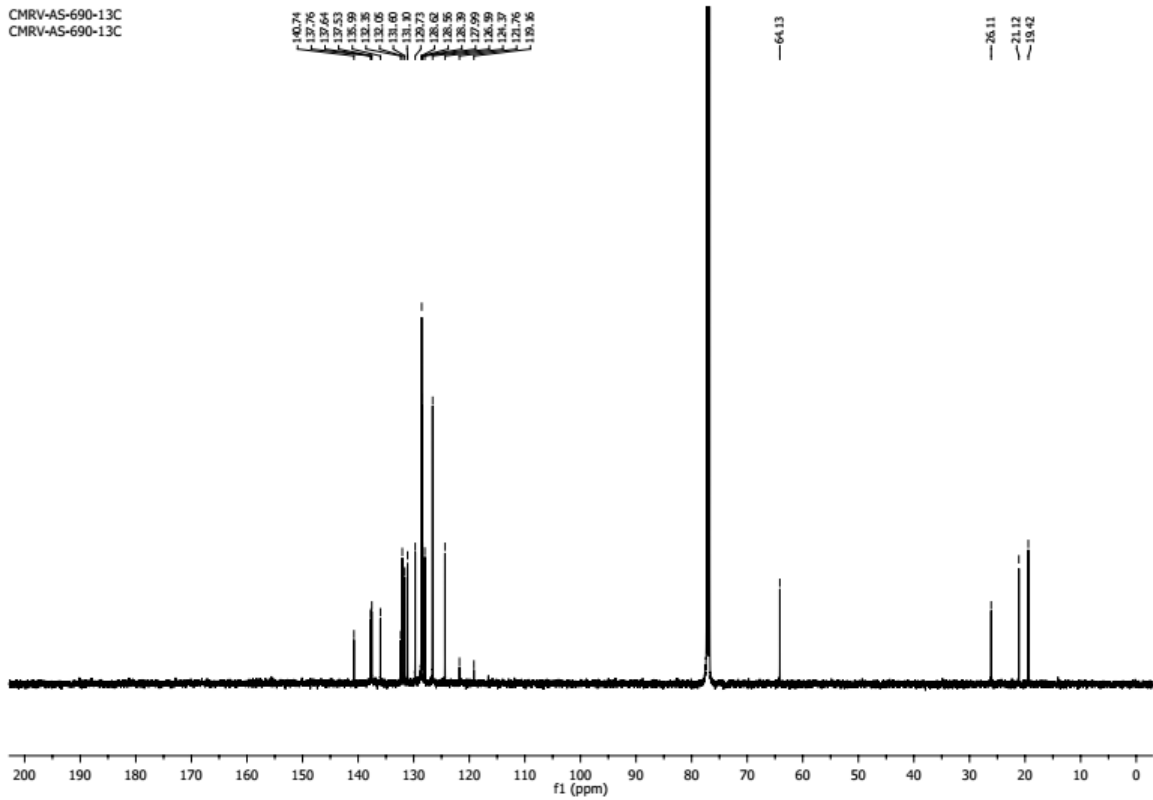

CMRV-AS-619-1H  
CMRV-AS-619-1H

7.31  
7.29  
7.28  
7.27  
7.25  
7.24  
7.04  
6.77  
6.43  
6.39  
6.18  
6.13  
6.00  
6.00  
5.98  
5.83

2.16  
2.16  
1.84

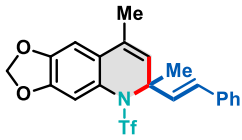

7o, 78%

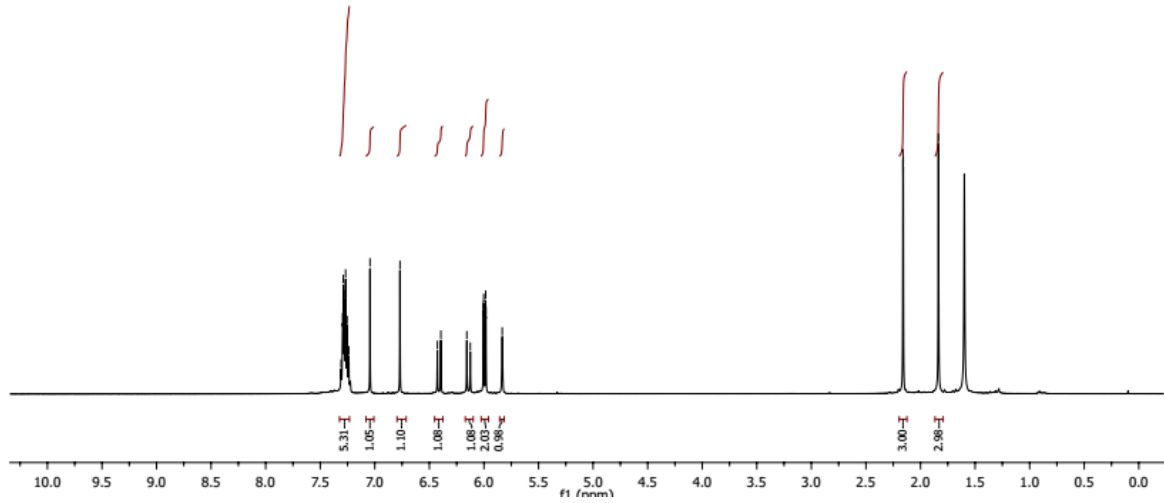

CMRV-AS-619-13C  
CMRV-AS-619-13C

147.09  
146.09  
138.13  
137.36  
131.60  
129.36  
128.79  
128.55  
128.39  
127.75  
127.02  
126.62  
106.59  
100.84  
101.80

64.38

26.54

18.25

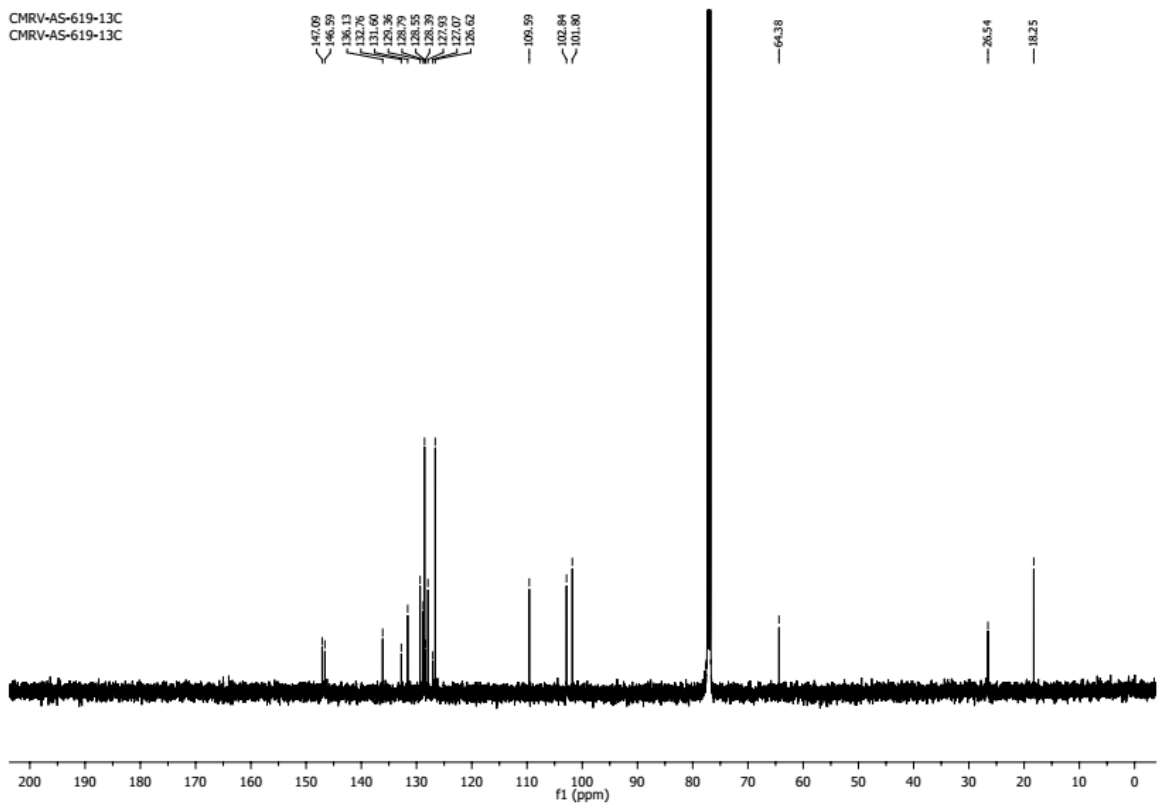

CMRV-AS-456-1H  
CMRV-AS-456-1H

7.53  
7.51  
7.34  
7.32  
7.30  
7.29  
7.28  
7.26  
7.25  
7.19  
7.17  
7.16  
7.14  
7.10  
7.06  
7.04  
6.99  
6.95  
5.08  
5.00  
5.98

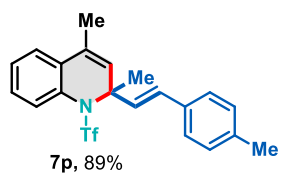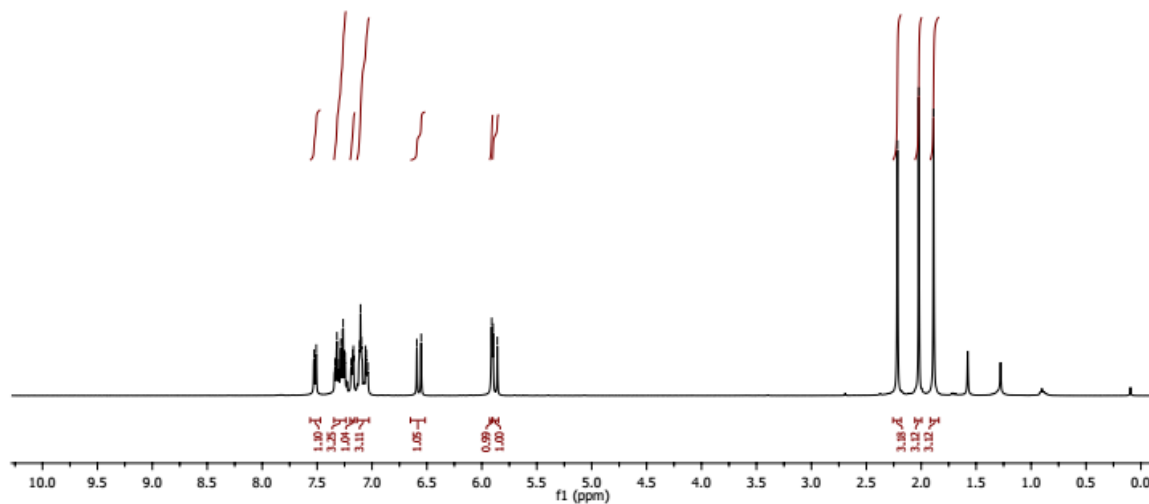

CMRV-AS-456-13C  
CMRV-AS-456-13C

138.99  
134.67  
133.96  
132.38  
130.70  
130.03  
128.17  
127.98  
127.05  
126.06  
124.04  
21.97

61.99

26.51  
19.47  
1.39

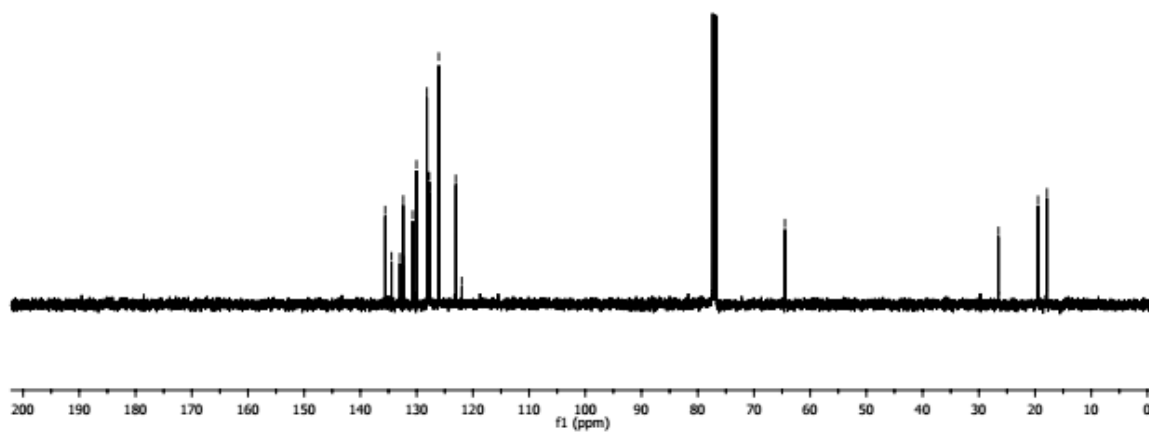

CMRV-AS-453A-1H  
CMRV-AS-453A-1H

7.566  
7.534  
7.508  
7.238  
7.235  
7.234  
7.232  
7.230  
7.229  
7.217  
7.211  
7.099

2.23  
1.95

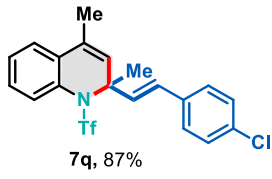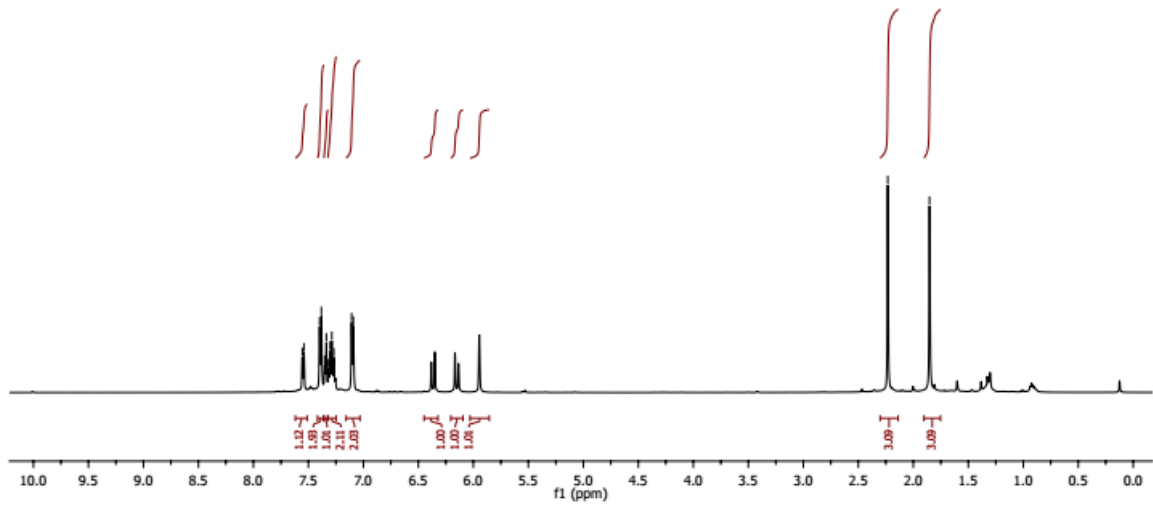

CMRV-AS-453A-13C  
CMRV-AS-453A-13C

134.06  
134.03  
134.03  
132.00  
131.99  
131.65  
130.90  
129.81  
129.03  
128.96  
127.79  
123.13  
121.78  
121.01  
119.08

64.14

26.43  
1.95

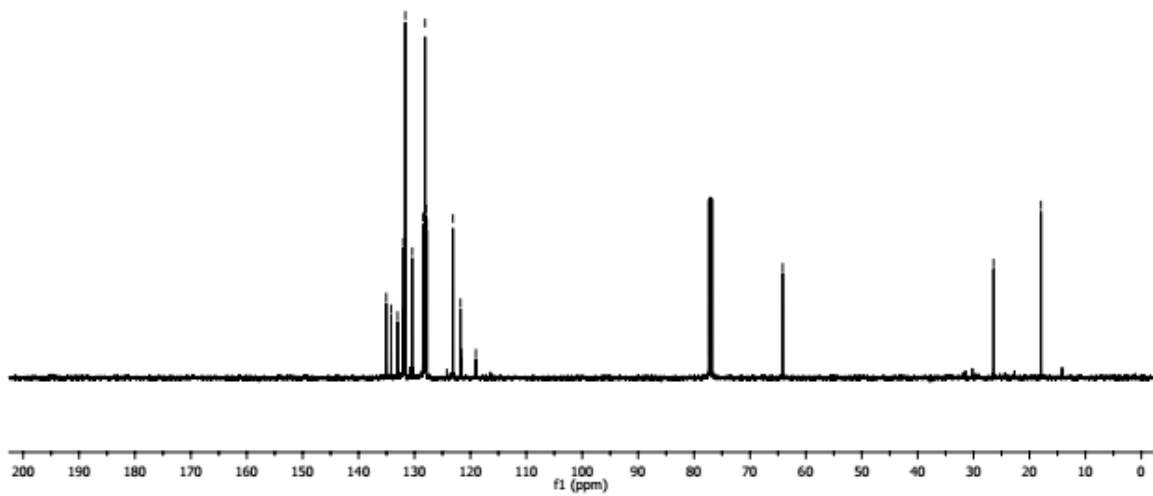

CMRV-AS-453B-1H  
CMRV-AS-453B-1H

7.57  
7.56  
7.55  
7.54  
7.53  
7.52  
7.51  
7.50  
7.49  
7.48  
7.47  
7.46  
7.45  
7.44  
7.43  
7.42  
7.41  
7.40  
7.39  
7.38  
7.37  
7.36  
7.35  
7.34  
7.33  
7.32  
7.31  
7.30  
7.29  
7.28  
7.27  
7.26  
7.25  
7.24  
7.23  
7.22  
7.21  
7.20  
7.19  
7.18  
7.17  
7.16  
6.41  
6.37  
6.16  
6.11  
5.98

2.24  
2.24  
1.08

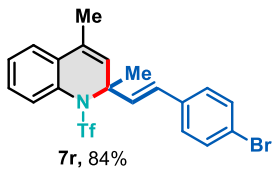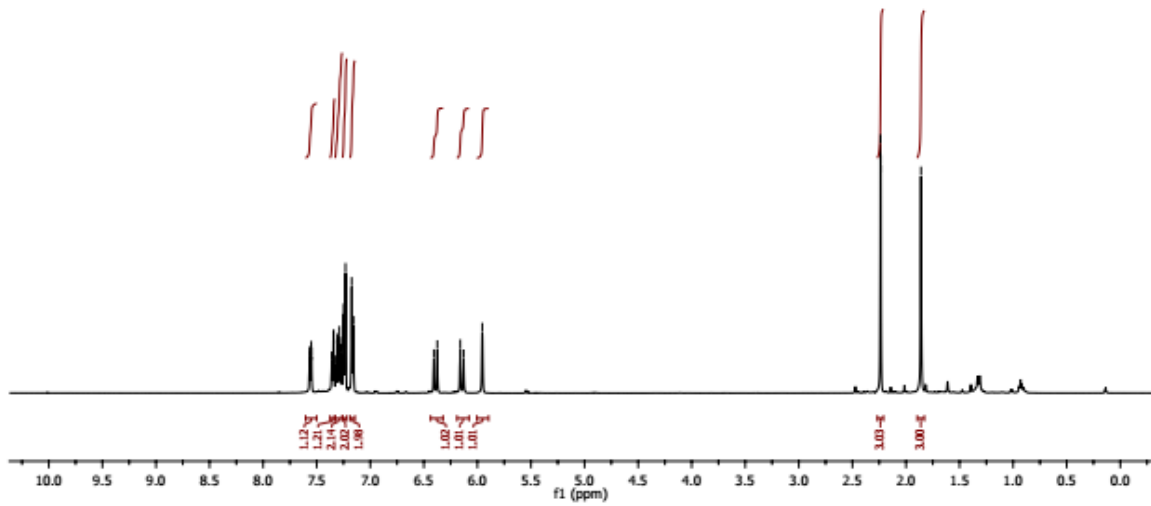

CMRV-AS-453B-13C  
CMRV-AS-453B-13C

134.63  
133.62  
133.01  
132.10  
131.87  
130.44  
128.70  
128.03  
127.95  
127.81  
123.13  
119.04

64.16

26.46

17.94

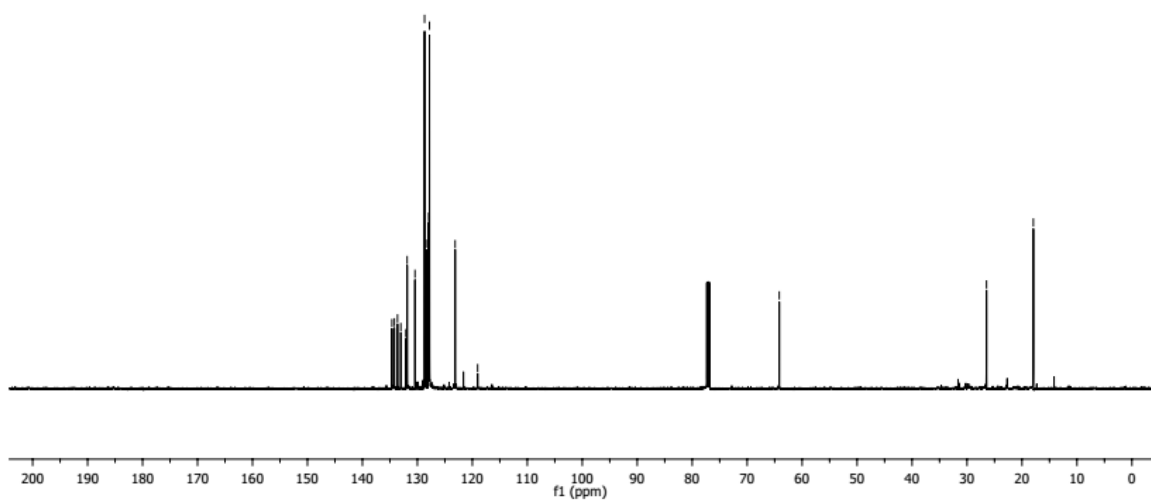

CMRV-AS-455-13C  
CMRV-AS-455-13C

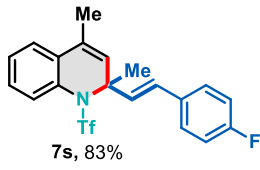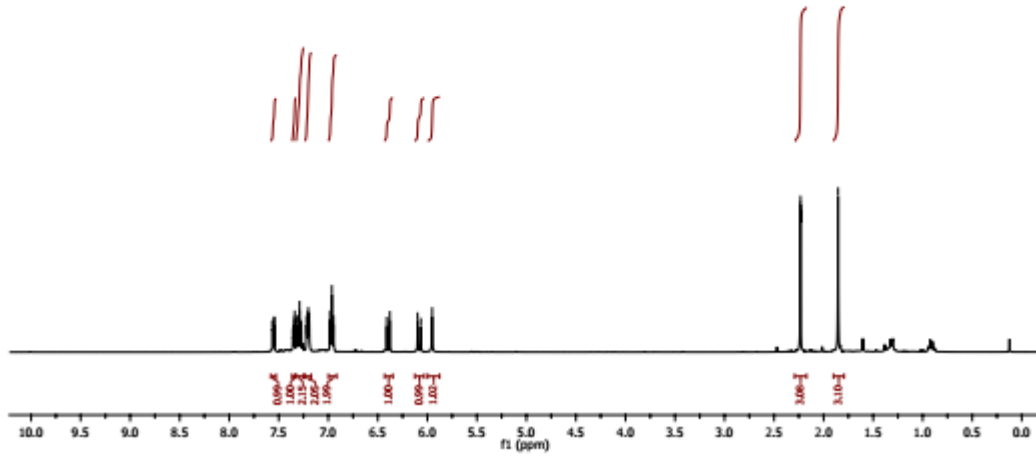

CMRV-AS-455-13C  
CMRV-AS-455-13C

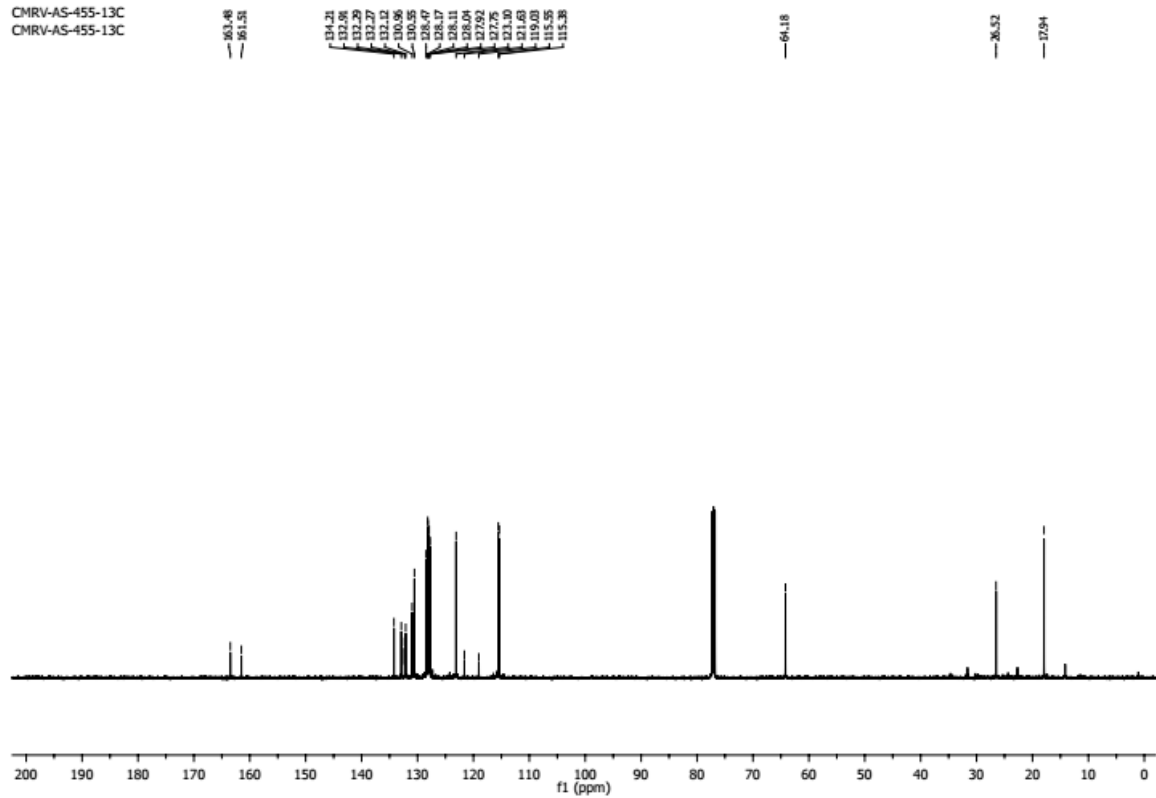

CMRV-AS-620-1H  
CMRV-AS-620-1H

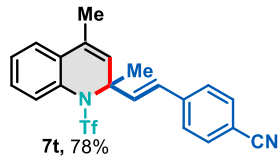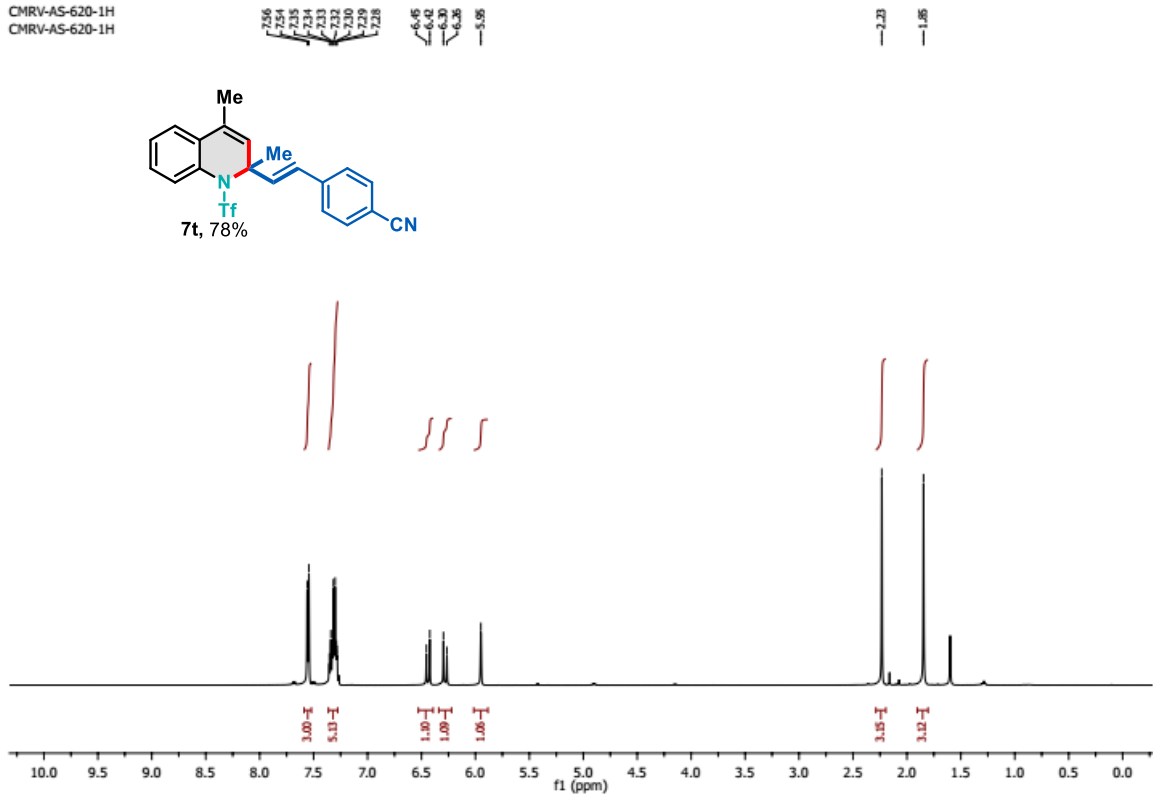

CMRV-AS-620-13C  
CMRV-AS-620-13C

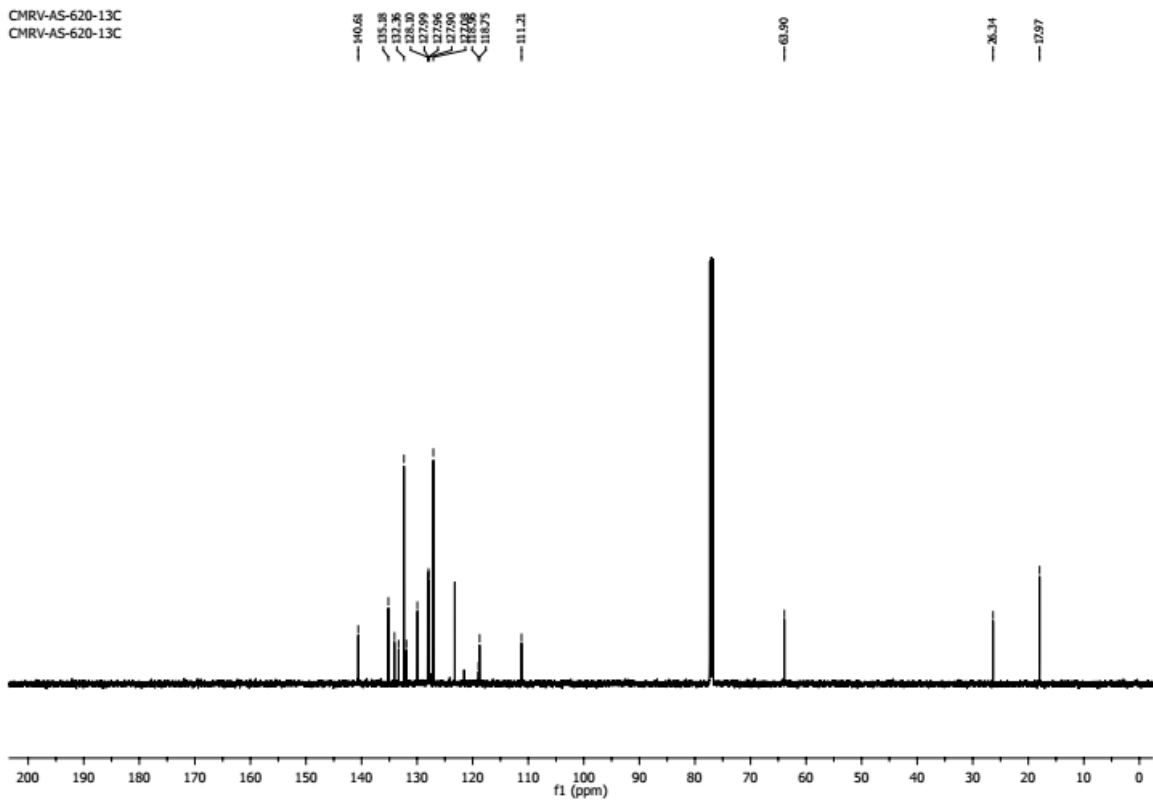



CMRV-AS-457-1H  
CMRV-AS-457-1H

7.53  
7.52  
7.51  
7.50  
7.48  
7.33  
7.31  
7.29  
7.28  
7.27  
7.26  
7.25  
7.24  
7.23  
6.44  
6.40  
6.24  
6.20  
5.93

2.21  
2.21  
1.83

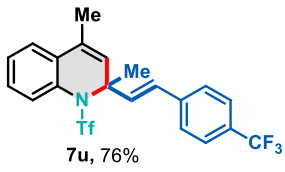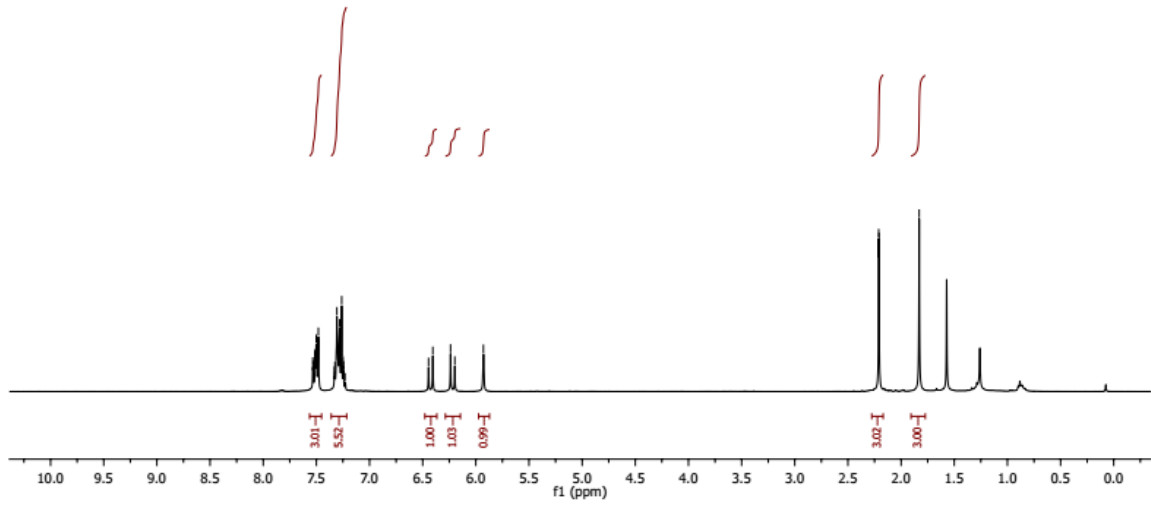

CMRV-AS-457-13C  
CMRV-AS-457-13C

134.12  
134.08  
133.97  
133.84  
133.64  
133.20  
133.00  
132.91  
128.60  
128.44  
123.32

77.52  
77.20  
76.88

64.18

26.57

18.12

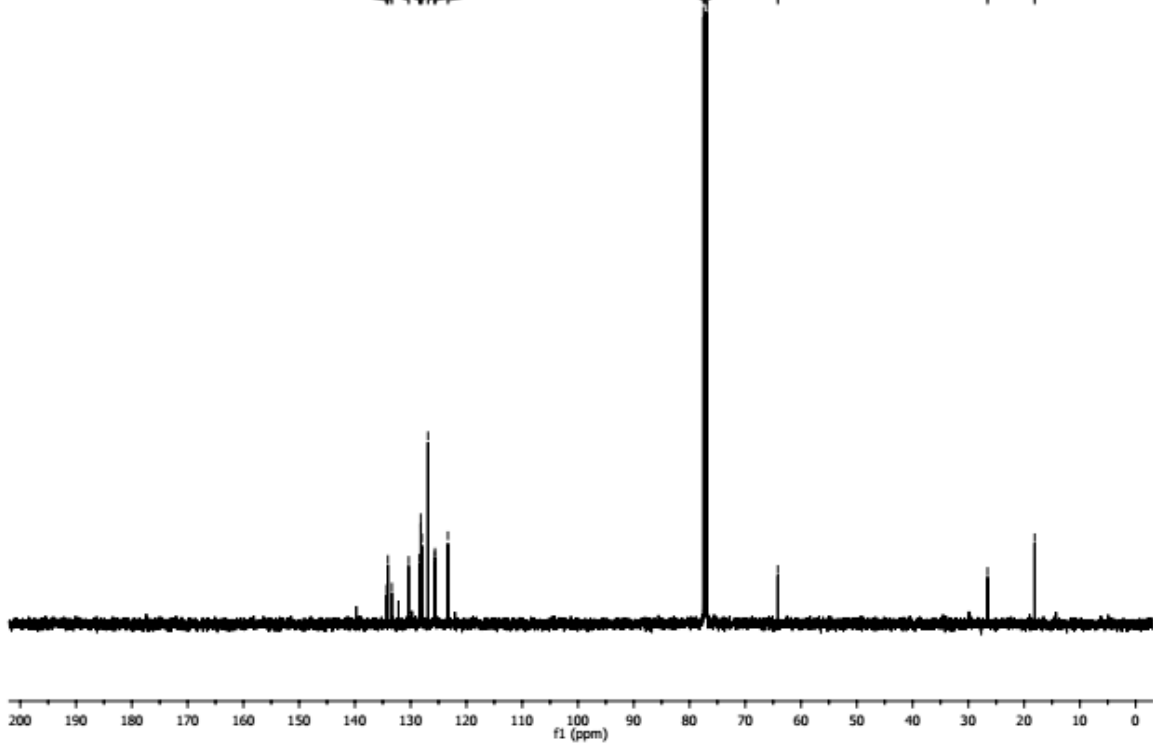

CMRV-AS-692-11C  
 CMRV-AS-692-11C

2.21  
 2.21  
 1.83

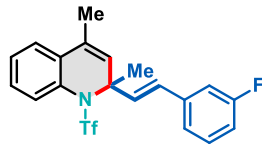

7v, 82%

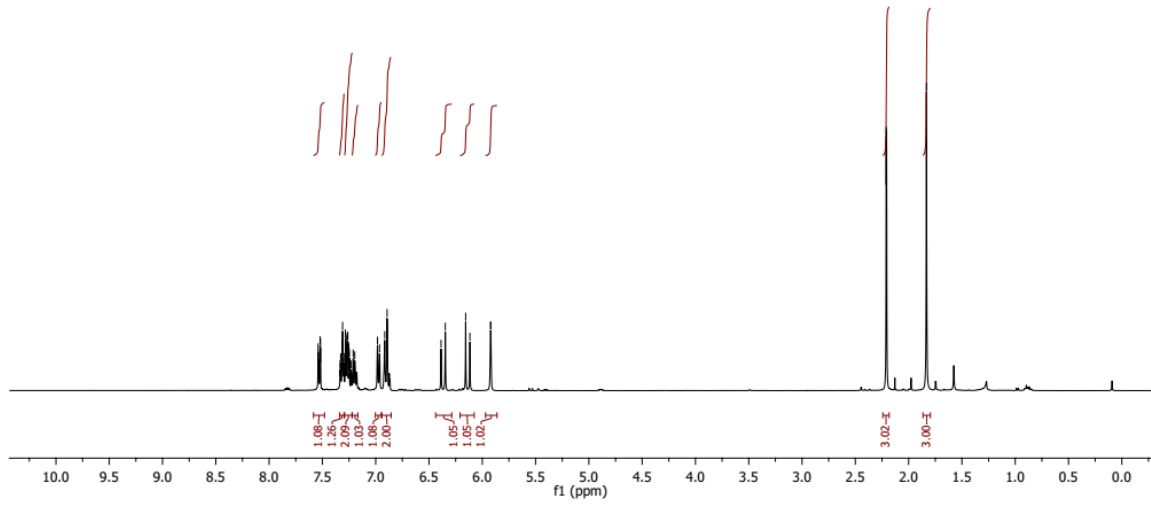

CMRV-AS-692-re-13C  
 CMRV-AS-692-re-13C

164.17  
 161.73  
 138.49  
 134.41  
 134.08  
 132.65  
 132.06  
 130.37  
 130.03  
 129.95  
 128.94  
 128.02  
 127.97  
 127.79  
 123.13  
 122.45  
 122.43  
 121.65  
 118.89  
 114.83  
 114.62  
 113.19  
 112.97

64.07

26.45

17.94

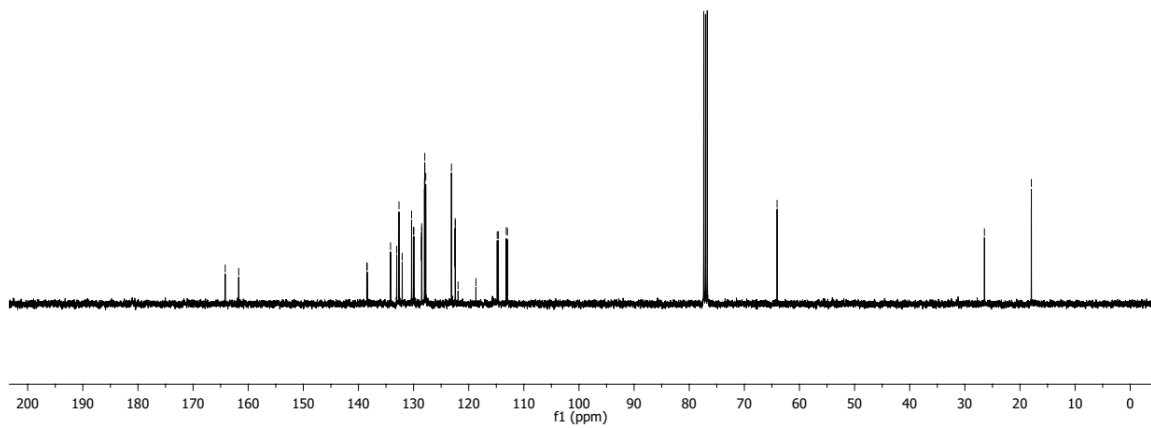

CMRV-AS-623-13C  
CMRV-AS-623-13C  
12.31  
12.31  
12.30  
12.30  
12.29  
12.28  
12.27  
12.26  
12.26  
12.25  
12.24  
12.17  
12.17  
12.16  
12.08  
12.08  
12.07  
12.07  
12.00  
12.00  
8.14  
8.14  
8.10  
8.10  
5.91  
5.90

2.20  
2.20  
1.88  
1.57

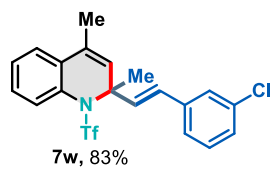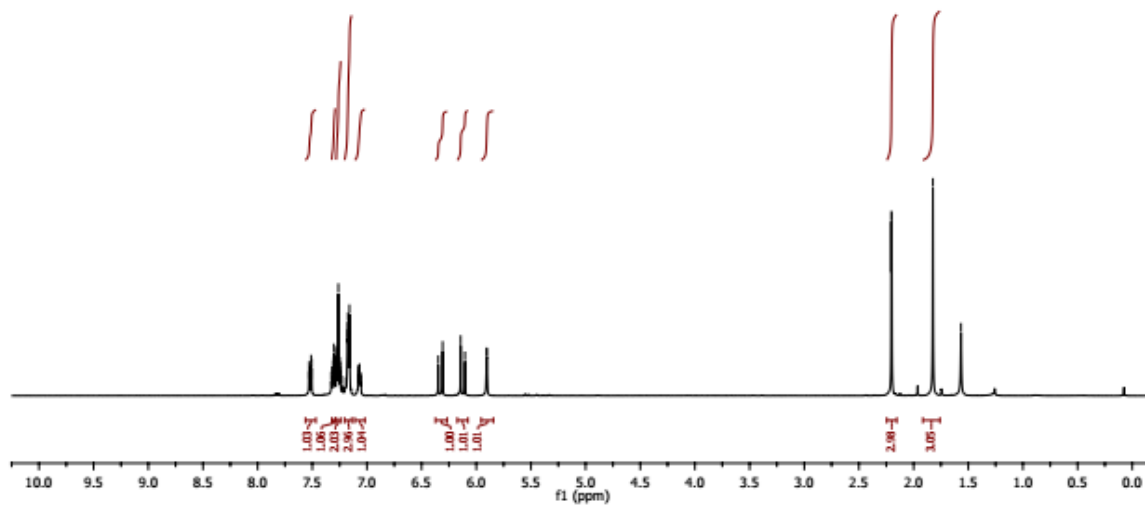

CMRV-AS-623-13C  
CMRV-AS-623-13C

132.06  
134.49  
134.18  
134.09  
132.76  
132.63  
130.32  
129.71  
129.51  
129.01  
127.99  
127.85  
127.78  
126.52  
124.71  
124.71  
124.51  
118.67

61.06

26.48

1.30

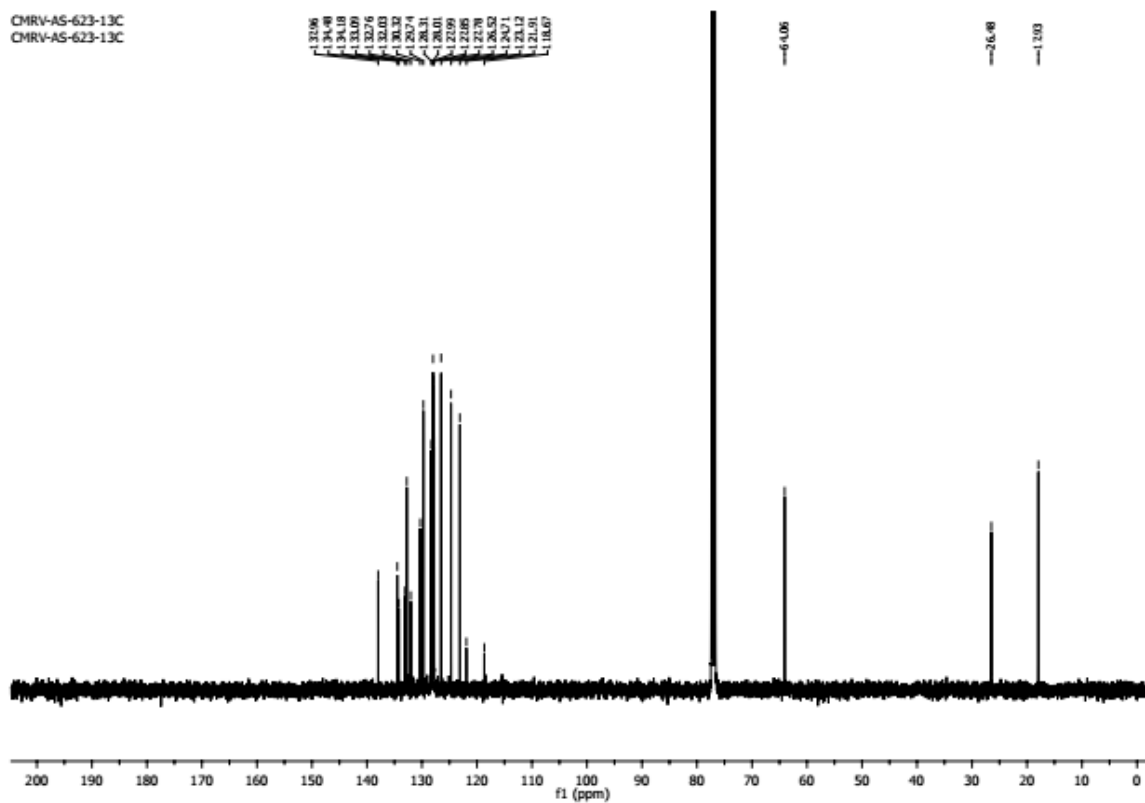

CMRV-AS-701-13C-RE  
 CMRV-AS-701-13C-RE

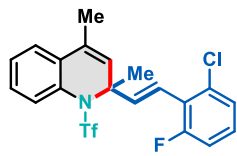

2.24  
 2.23  
 1.09

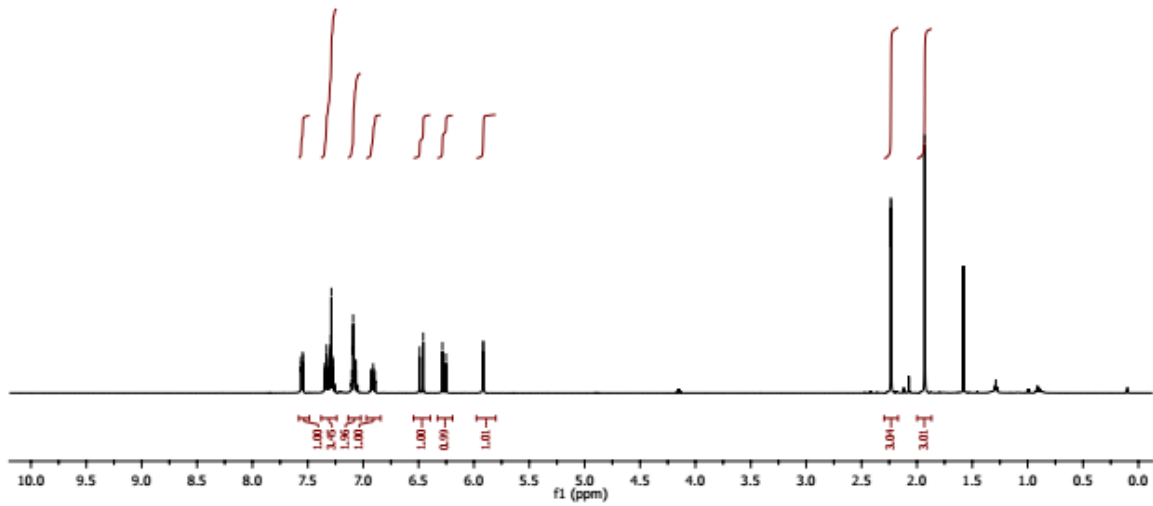

CMRV-AS-701-13C-RE  
 CMRV-AS-701-13C-RE

161.81  
 151.81  
 137.75  
 134.67  
 134.46  
 134.01  
 133.82  
 133.56  
 133.16  
 130.09  
 128.50  
 128.42  
 128.21  
 127.99  
 127.88  
 125.35  
 125.32  
 123.15  
 123.04  
 121.62  
 120.26  
 119.85  
 114.53  
 114.35

6.05

26.31

1.90

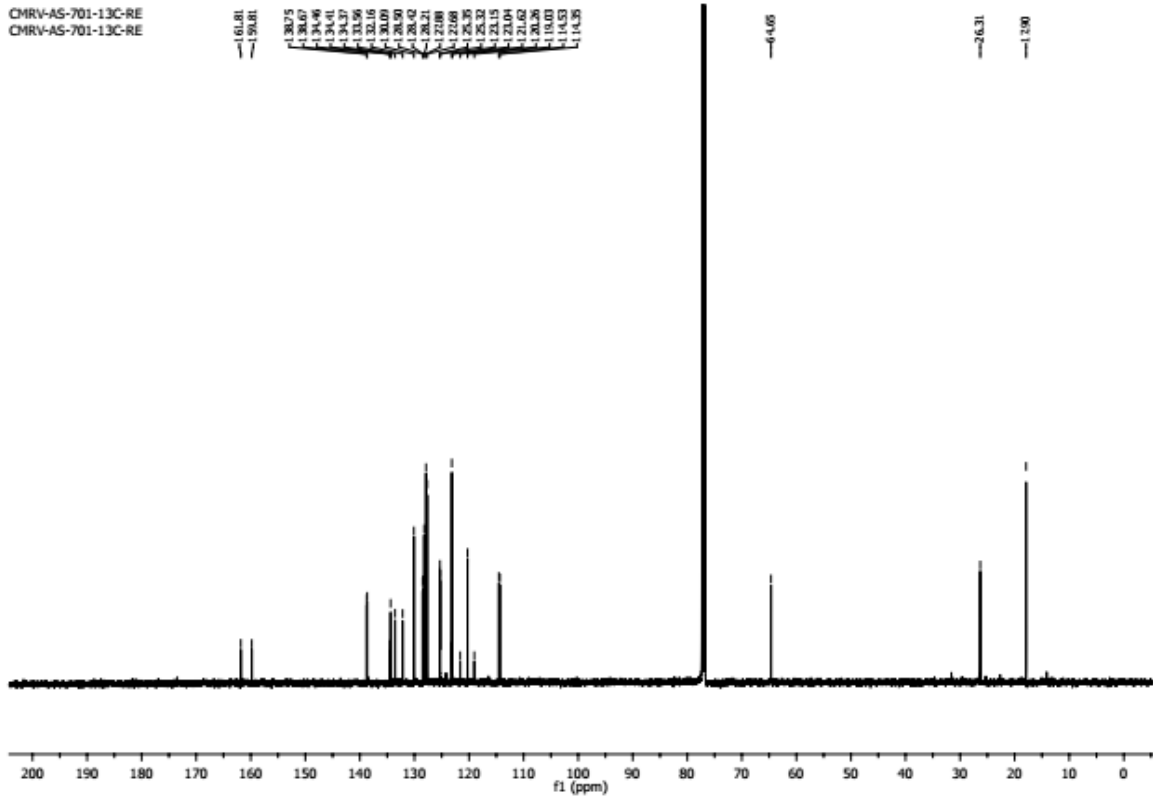



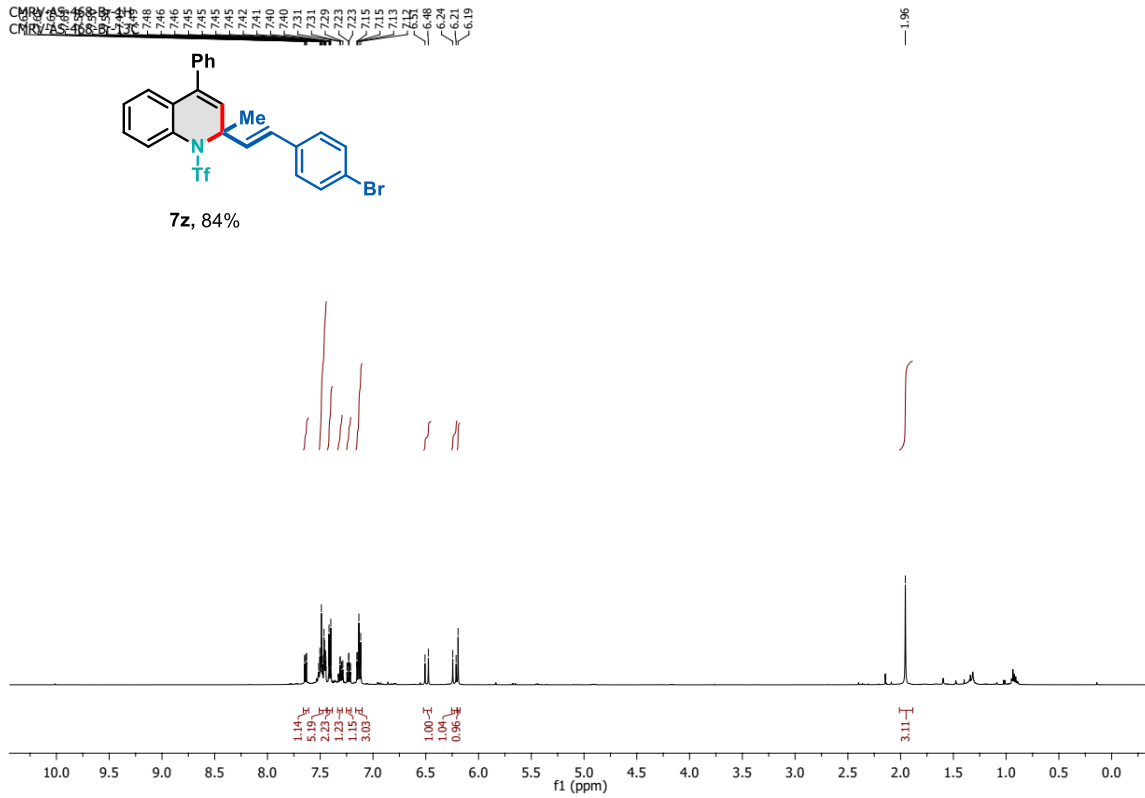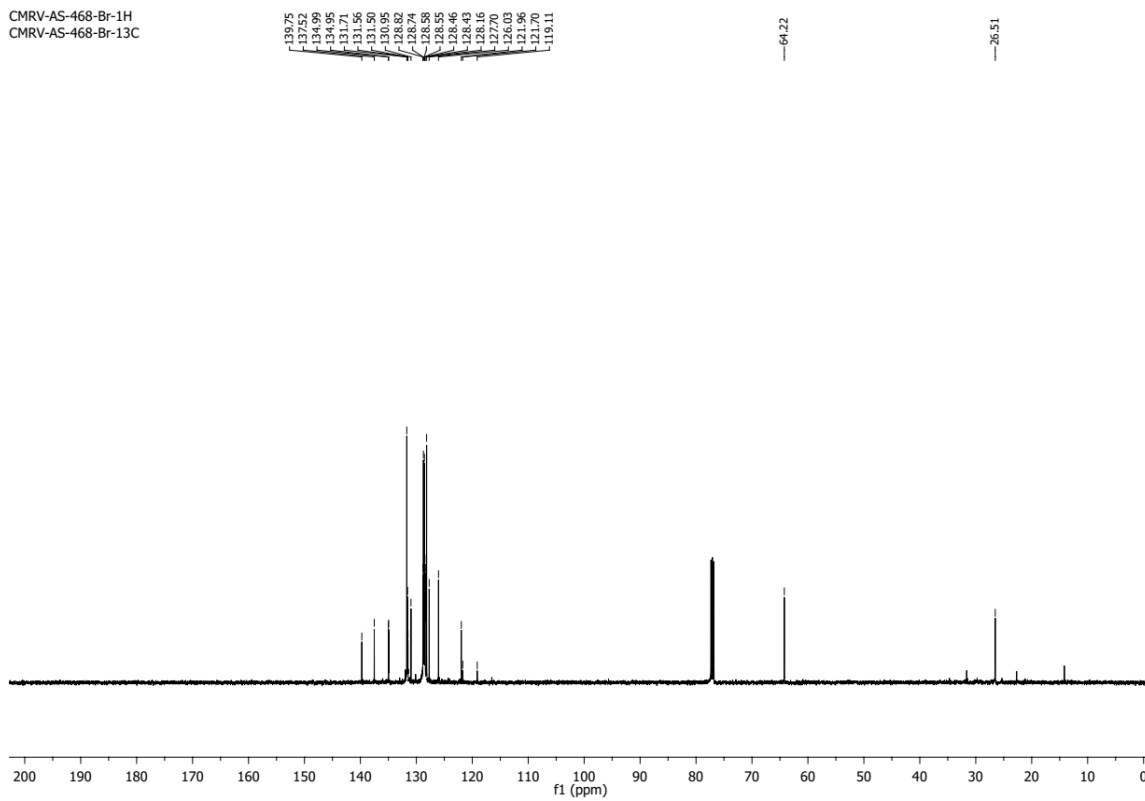

CMRV-AS-898-11F  
 CMRV-AS-898-11F

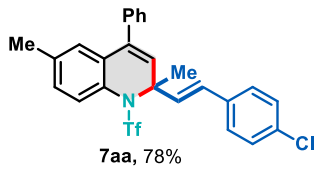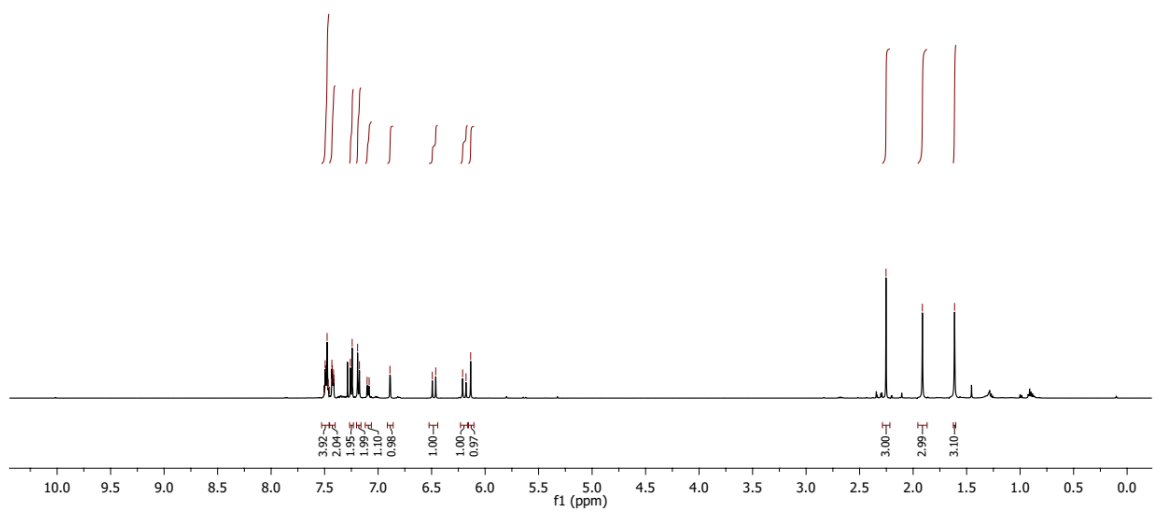

CMRV-AS-898-13C  
 CMRV-AS-898-13C

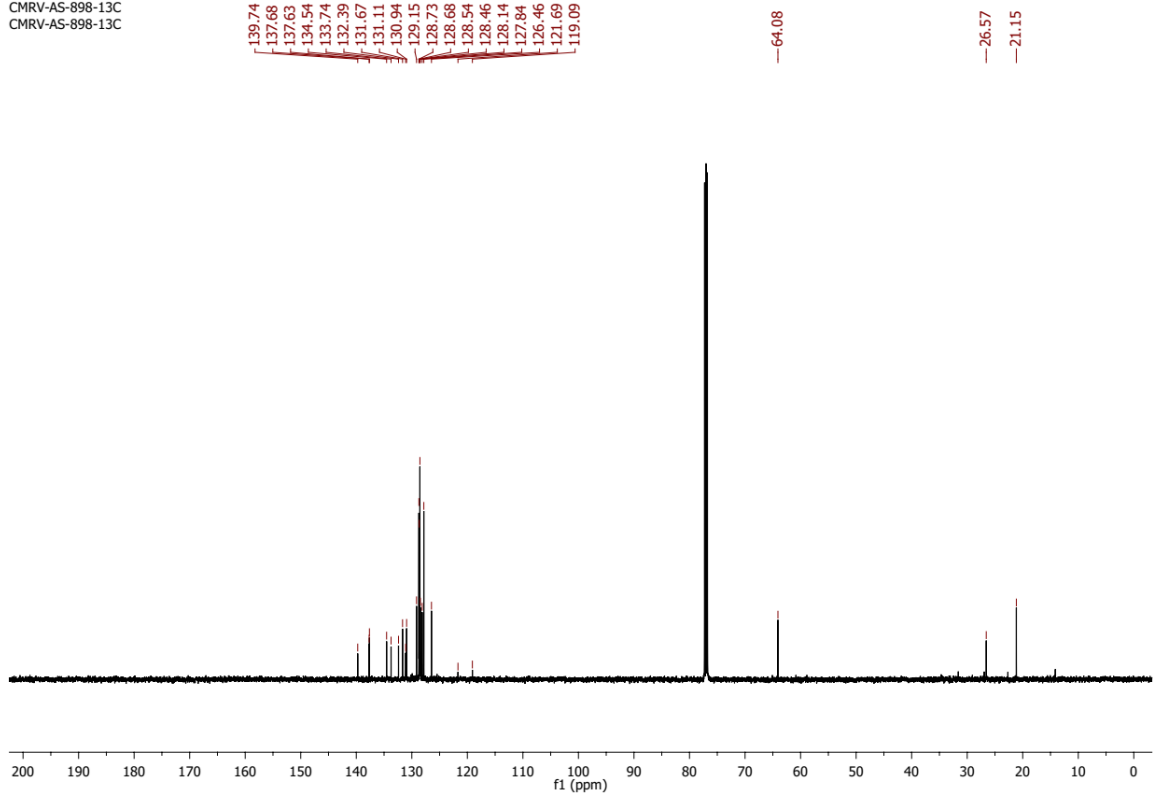

AS-458-1H  
CMRV-AS-458-1H

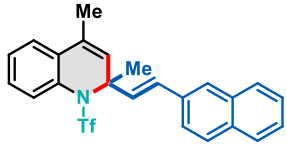

7ab, 84%

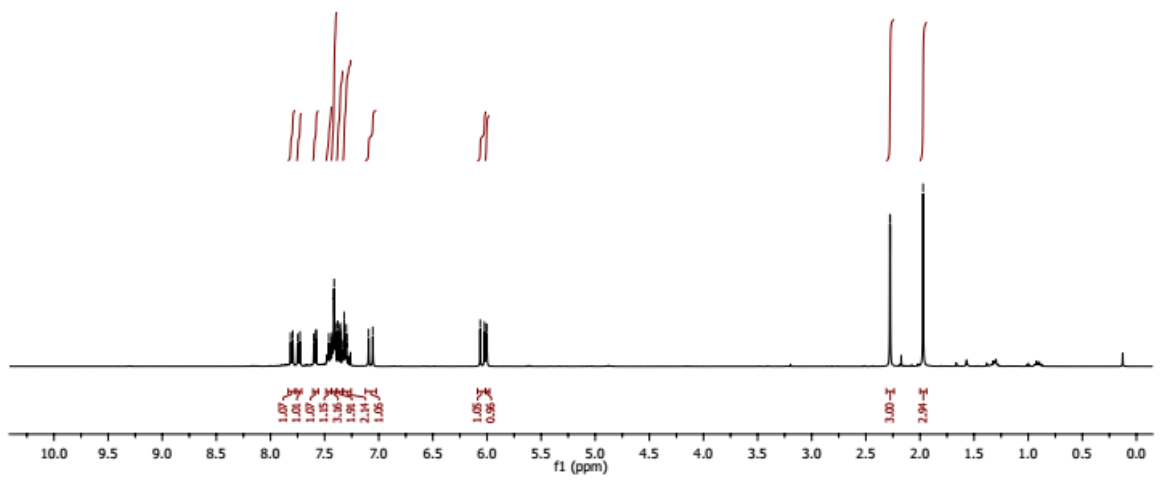

AS-458-13C  
CMRV-AS-458-13C

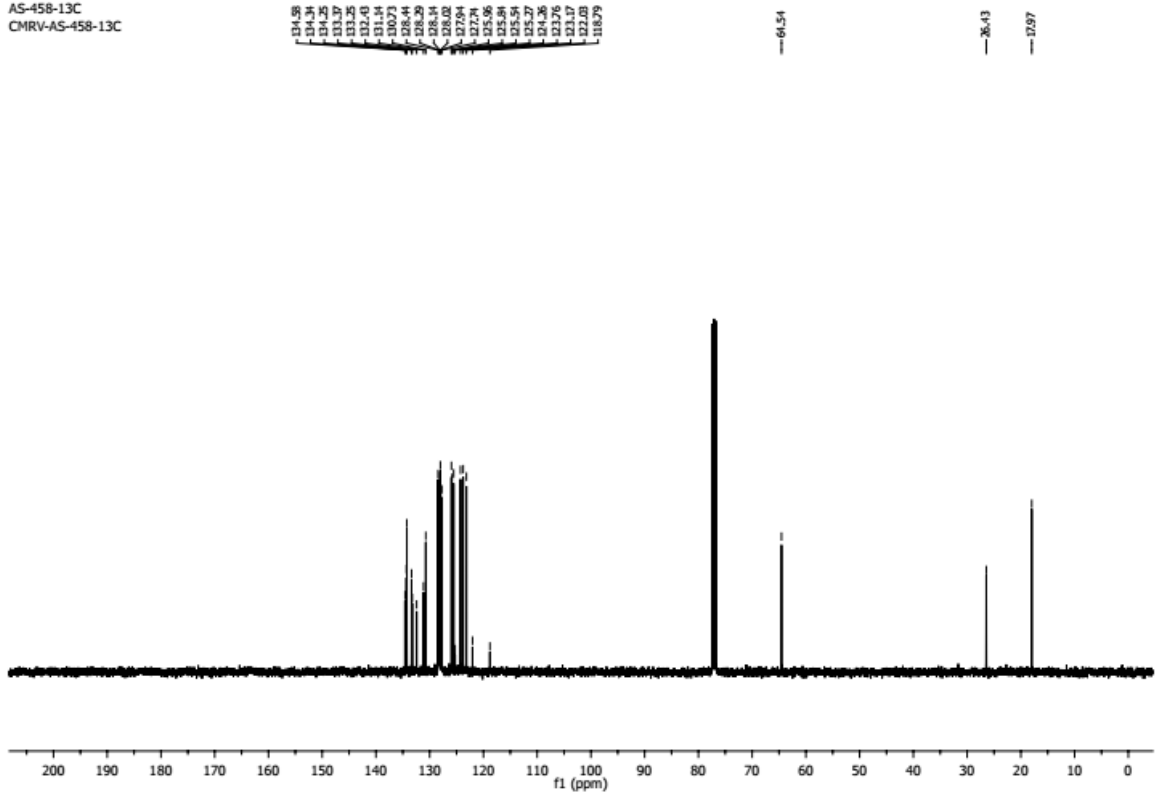



CMRV-AS-415-1H  
CMRV-AS-415-1H

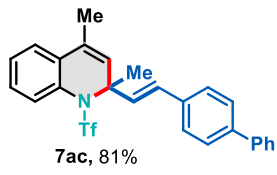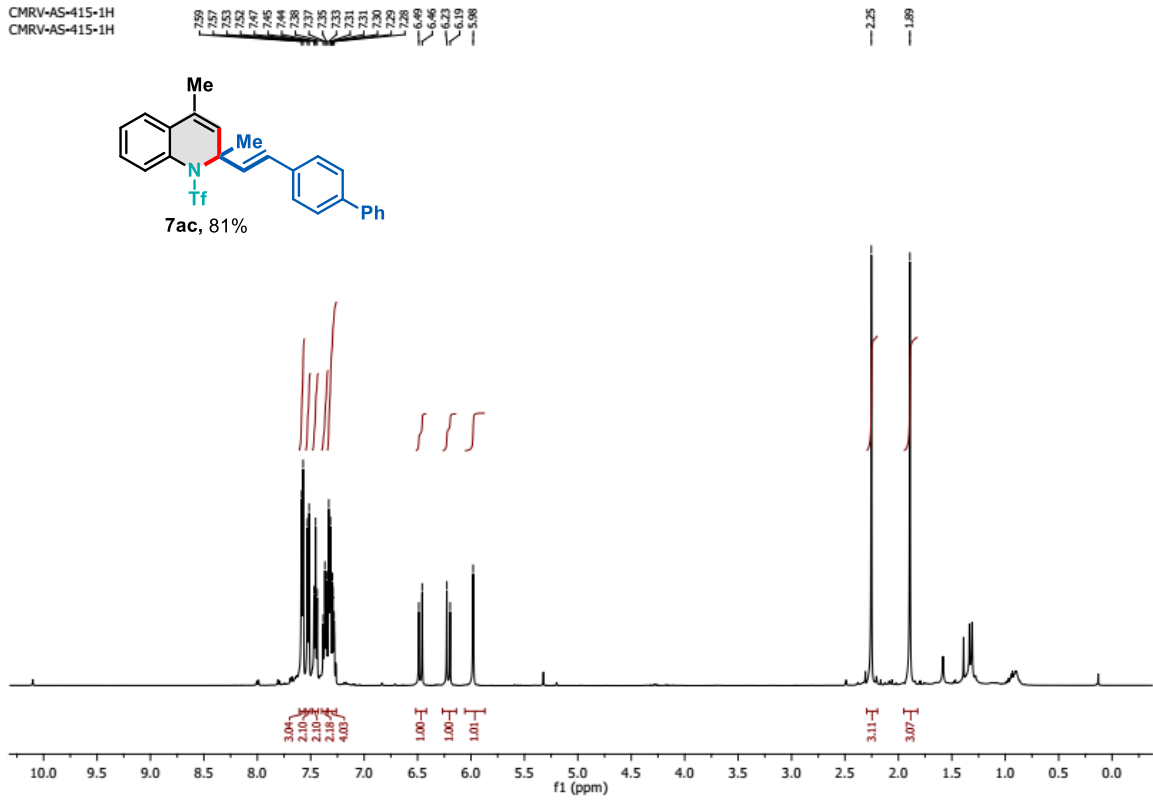

CMRV-AS-415-13C  
CMRV-AS-415-13C

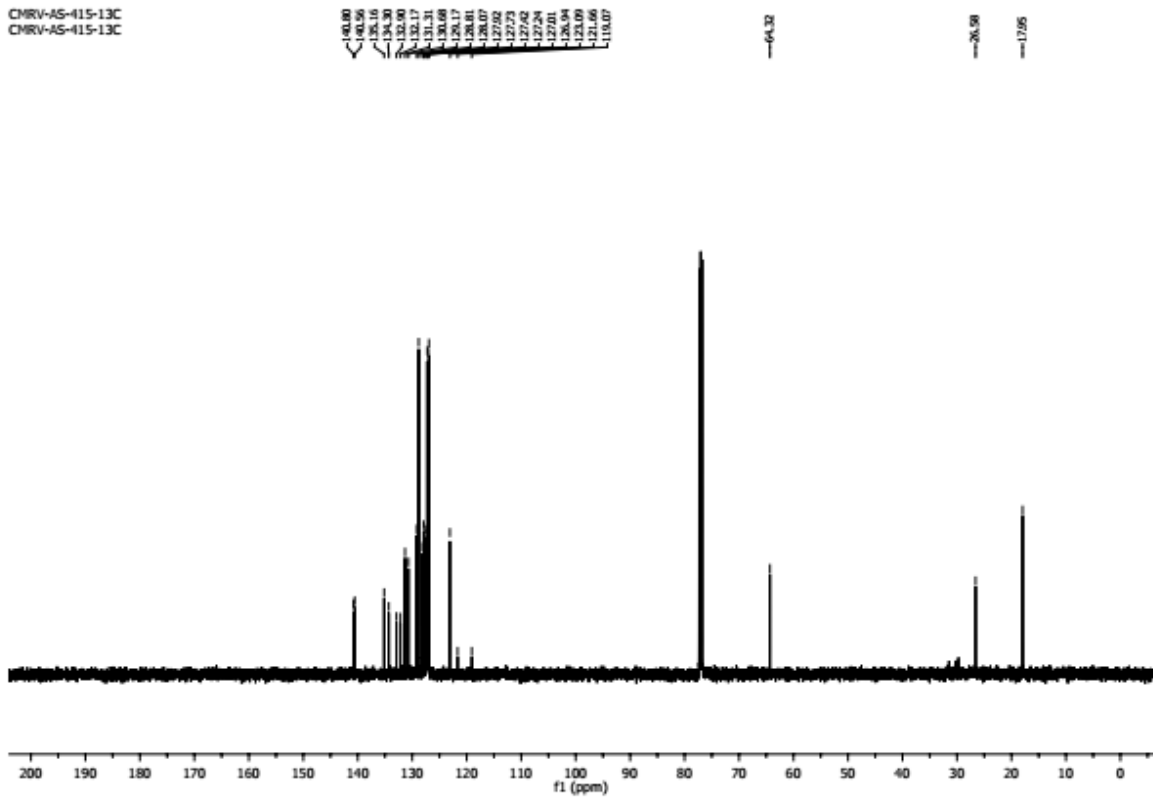

CMRV-AS-702-1H  
 CMRV-AS-672-1H

7.97, 7.93, 7.53, 7.52, 7.51, 7.31, 7.29, 7.29, 7.27, 7.26, 7.25, 7.24, 7.24, 6.45, 6.41, 6.25, 6.21, 5.03, 4.84, 4.69, 4.51, 4.30, 4.18, 4.07, 2.21, 2.21, 2.17, 2.11, 2.11, 2.05, 1.91, 1.91, 1.90, 1.90, 1.89, 1.84, 1.84, 1.70, 1.70, 1.65, 1.65, 1.57, 1.55, 1.55, 1.50, 1.50, 1.28, 1.28, 1.27, 1.26, 1.26, 1.12, 1.12, 1.11, 1.11, 1.09, 1.09, 1.08, 1.08, 1.06, 1.06, 1.05, 1.05, 0.95, 0.95, 0.95, 0.95, 0.91, 0.91, 0.89, 0.89, 0.87, 0.87, 0.86, 0.86, 0.76

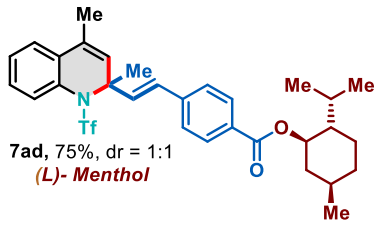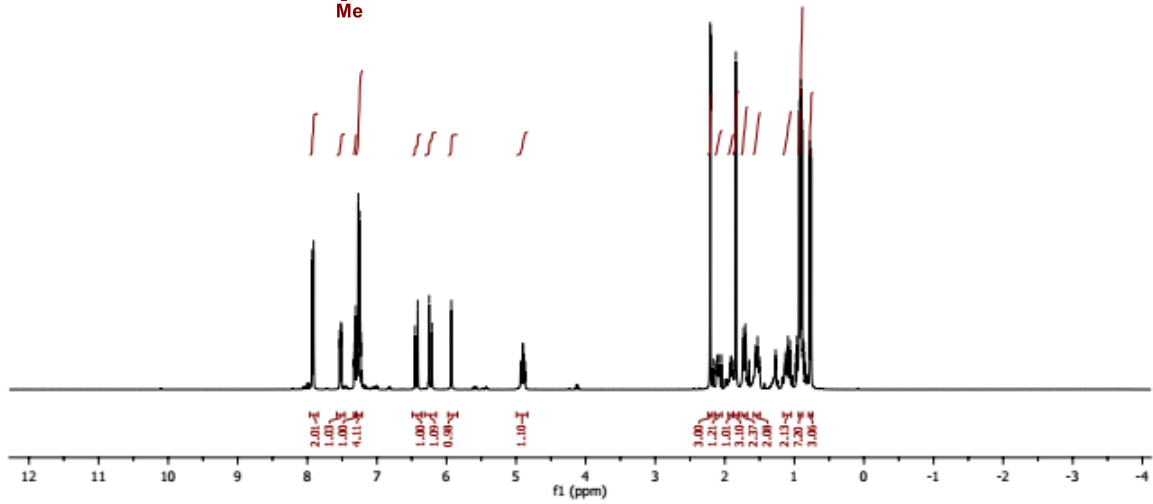

CMRV-AS-702-13C, CDCl<sub>3</sub> δ 120.8 (d, J = 325.8 Hz),  
 CMRV-AS-672-13C

165.8, 134.0, 133.7, 131.6, 131.0, 130.05, 130.30, 130.07, 129.83, 128.74, 128.74, 127.98, 127.98, 126.40, 123.14, 121.93, 118.69, 7.05, 6.11, 1.26, 0.96, 0.91, 0.86, 0.86, 0.83, 0.83, 0.80, 0.80, 0.76, 0.76, 0.74, 0.74, 0.71, 0.71, 0.69, 0.69, 0.65, 0.65, 0.63, 0.63, 0.61, 0.61, 0.59, 0.59, 0.57, 0.57, 0.55, 0.55, 0.53, 0.53, 0.51, 0.51, 0.49, 0.49, 0.47, 0.47, 0.45, 0.45, 0.43, 0.43, 0.41, 0.41, 0.39, 0.39, 0.37, 0.37, 0.35, 0.35, 0.33, 0.33, 0.31, 0.31, 0.29, 0.29, 0.27, 0.27, 0.25, 0.25, 0.23, 0.23, 0.21, 0.21, 0.19, 0.19, 0.17, 0.17, 0.15, 0.15, 0.13, 0.13, 0.11, 0.11, 0.09, 0.09, 0.07, 0.07, 0.05, 0.05, 0.03, 0.03, 0.01, 0.01

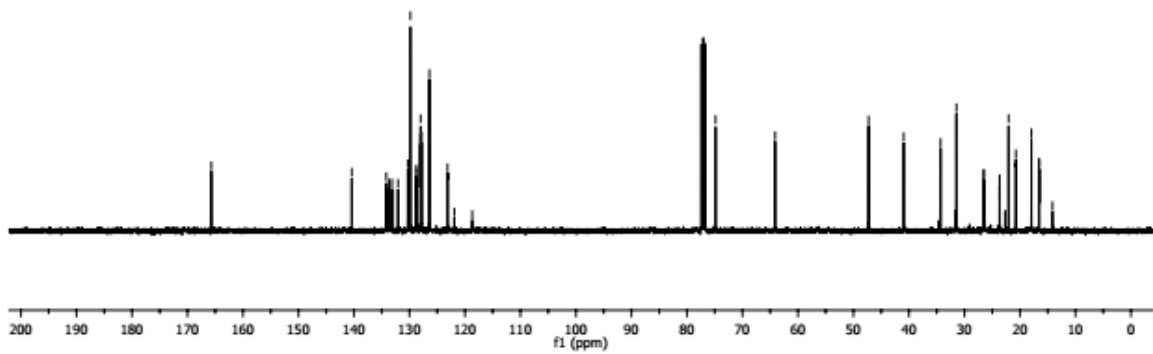

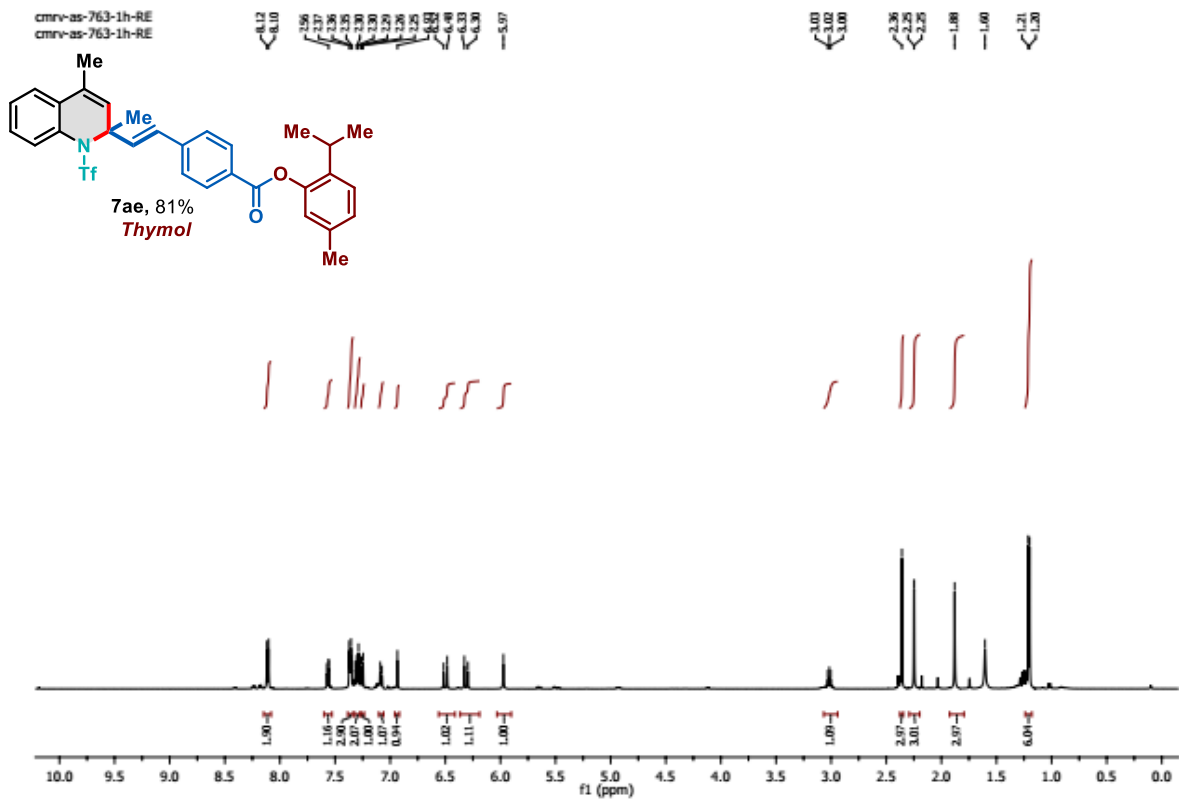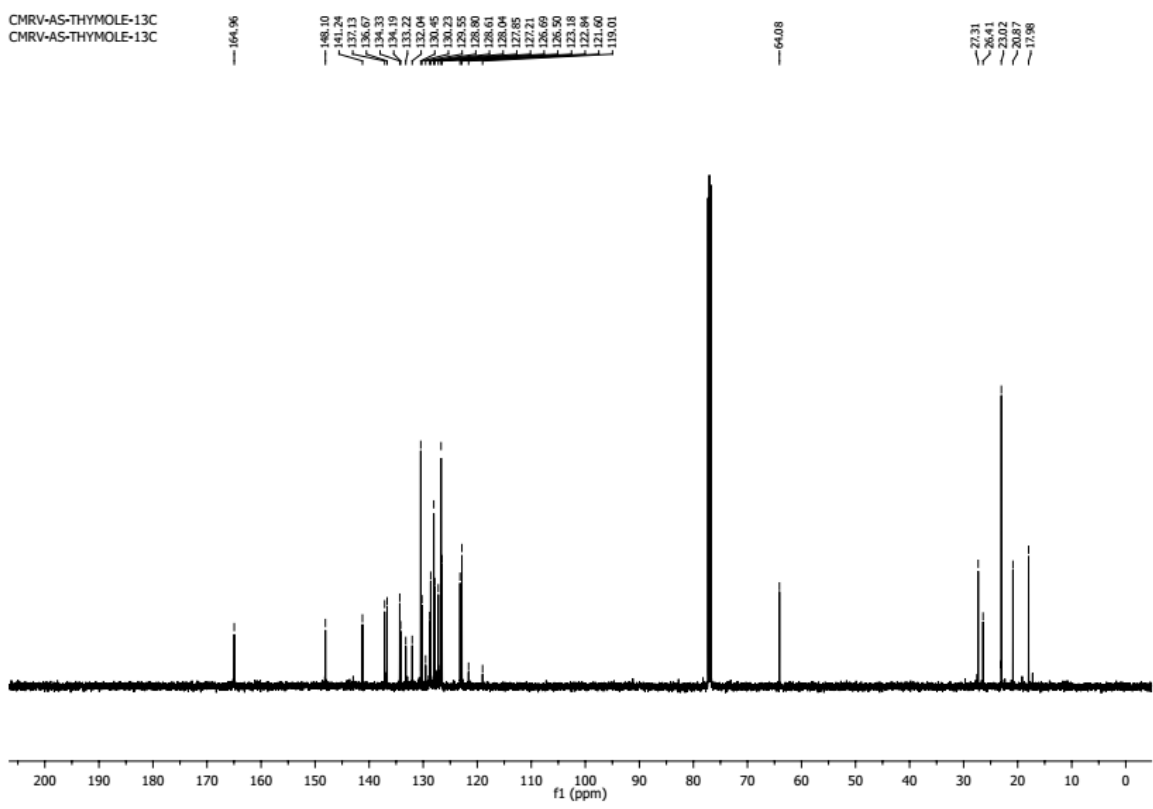

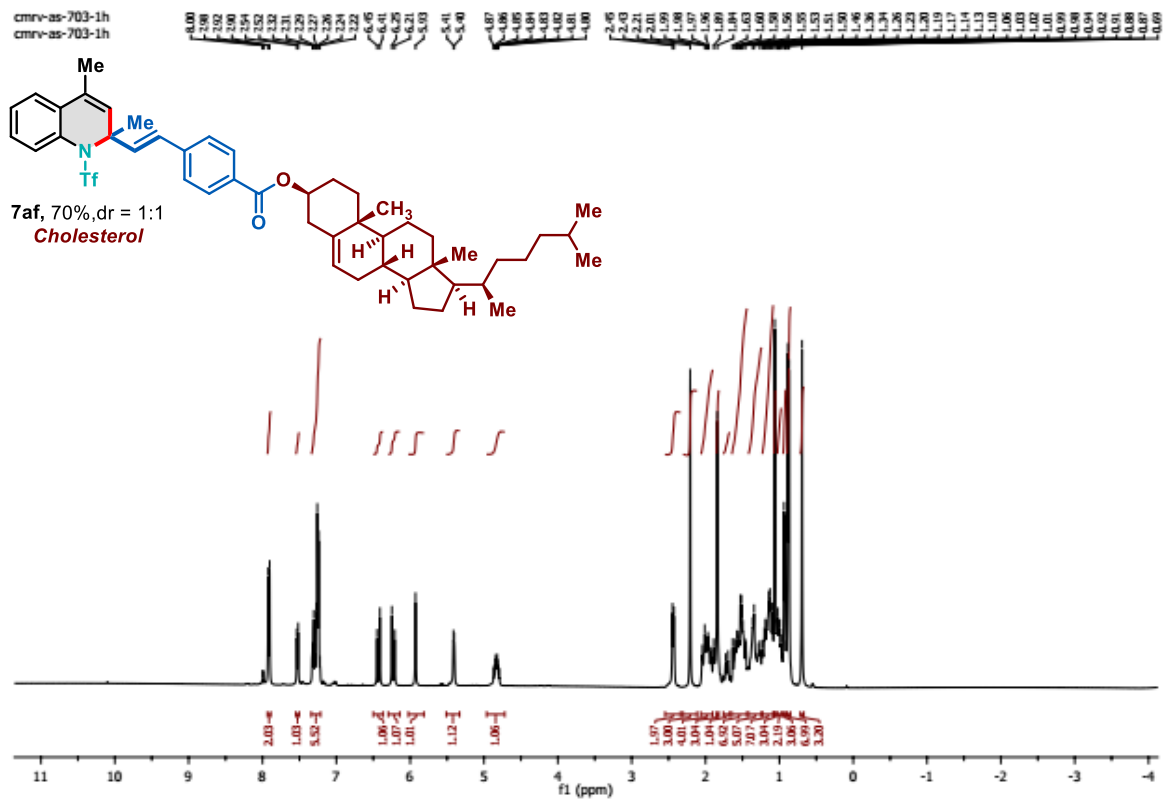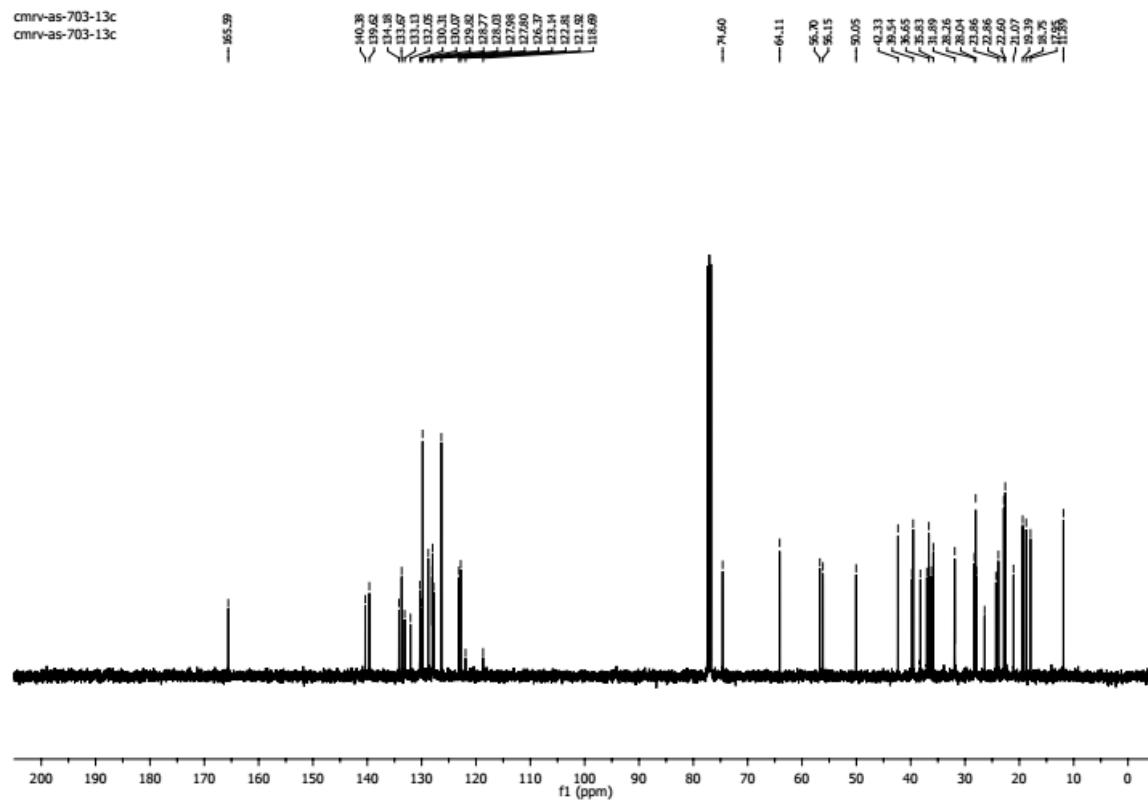

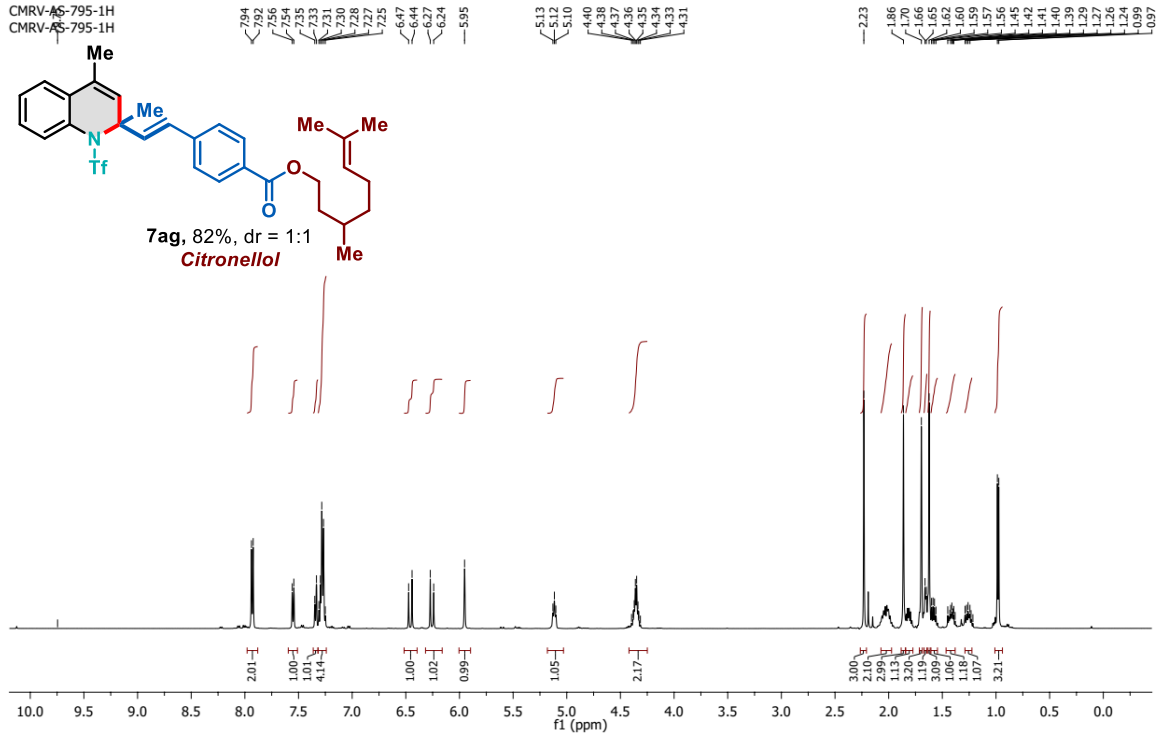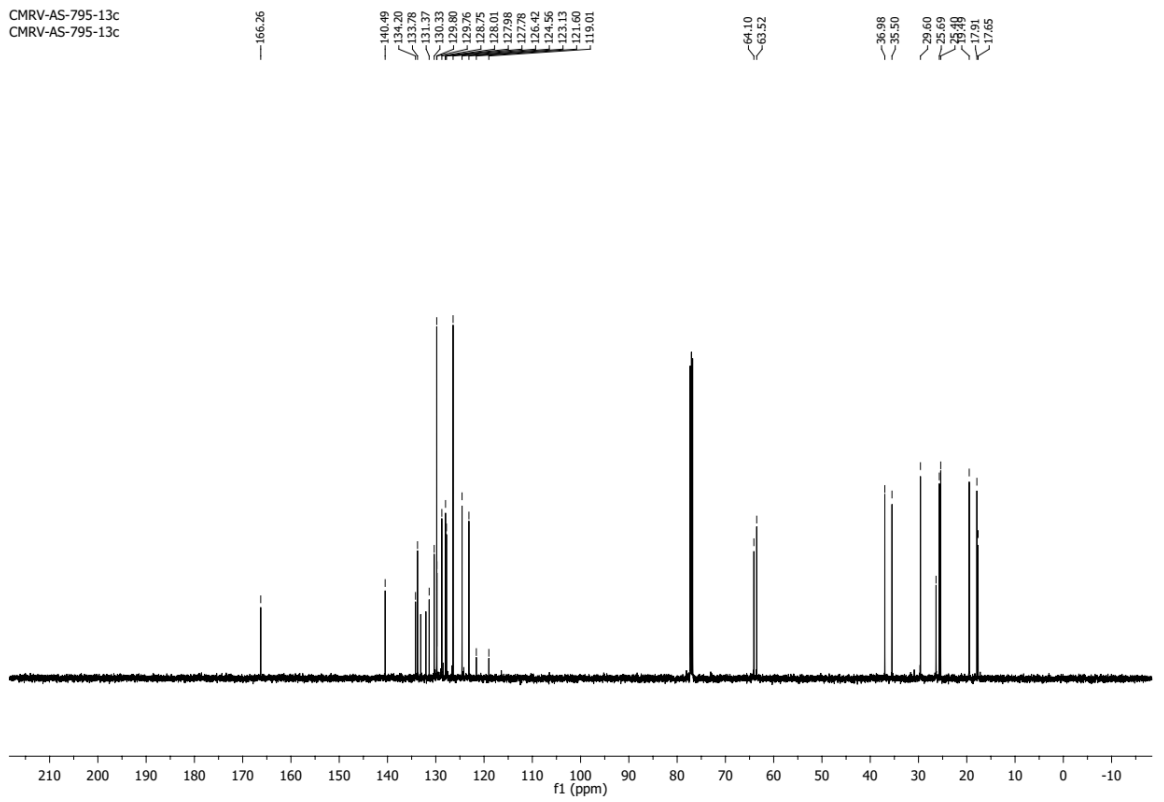

CMRV-AS-1H  
CMRV-AS-1H

7.40  
7.38  
7.35  
7.33  
7.31  
7.26  
7.25  
7.23  
7.21  
7.19  
7.17  
7.15  
6.92  
6.91  
6.83  
6.81  
6.80  
6.80  
6.80  
6.44

4.16  
4.13  
4.11  
3.69  
2.99  
2.98  
2.79  
2.77  
2.75  
2.74  
2.72  
2.71  
2.69  
2.57  
2.55  
2.54  
2.47  
2.44  
2.41  
2.31  
2.29  
2.27  
2.25  
2.01  
1.97  
1.92  
1.82  
1.63  
1.62  
1.60  
1.58  
1.56  
1.35

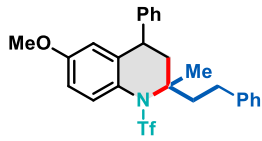

8, 82%

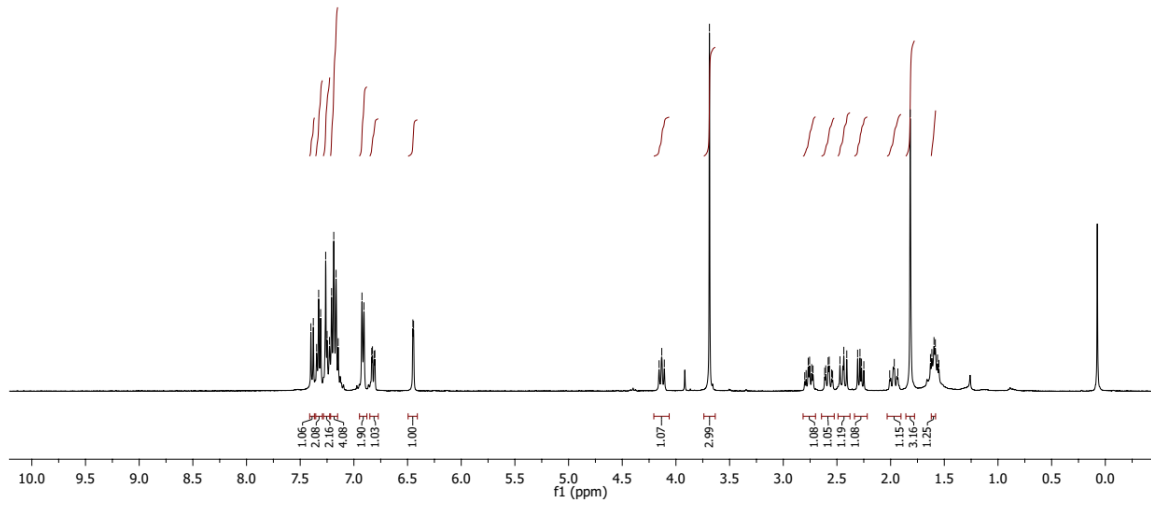

CMRV-AS-NH2-H2-13C  
CMRV-AS-NH2-H2-13C

158.34  
144.47  
141.24  
136.38  
129.08  
128.97  
128.48  
128.36  
128.24  
126.86  
126.85  
121.17  
114.71  
112.89  
66.01  
55.38  
46.38  
42.22  
41.20  
30.02  
25.08

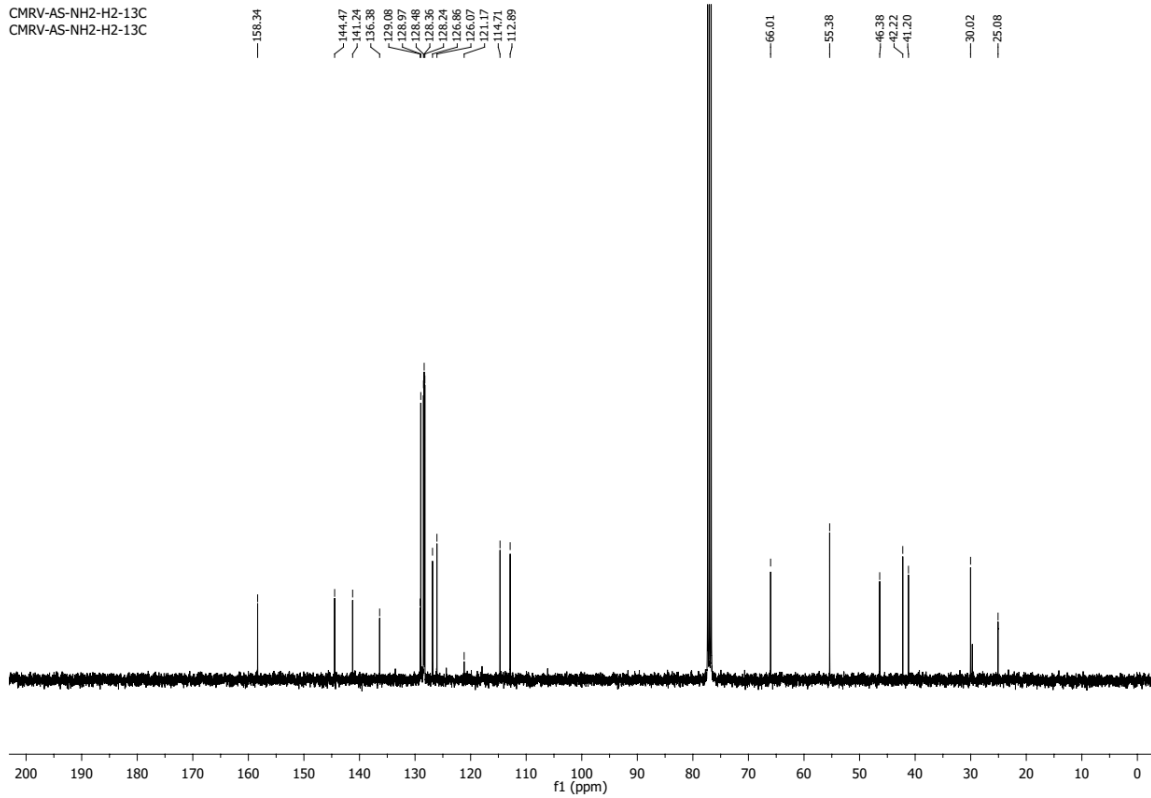

AS-378-1H.1.fid  
CMRV-AS-378-1H

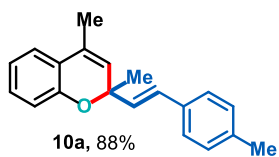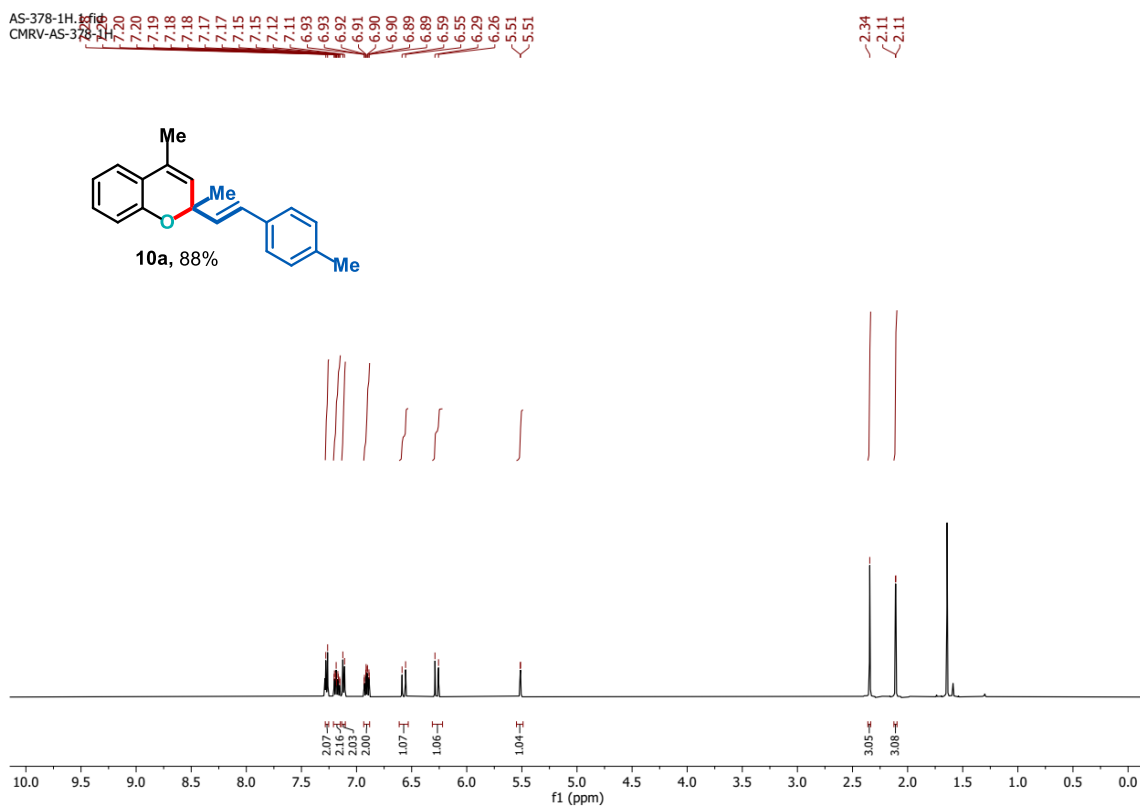

AS-378-1H.2.fid  
CMRV-AS-378-1H

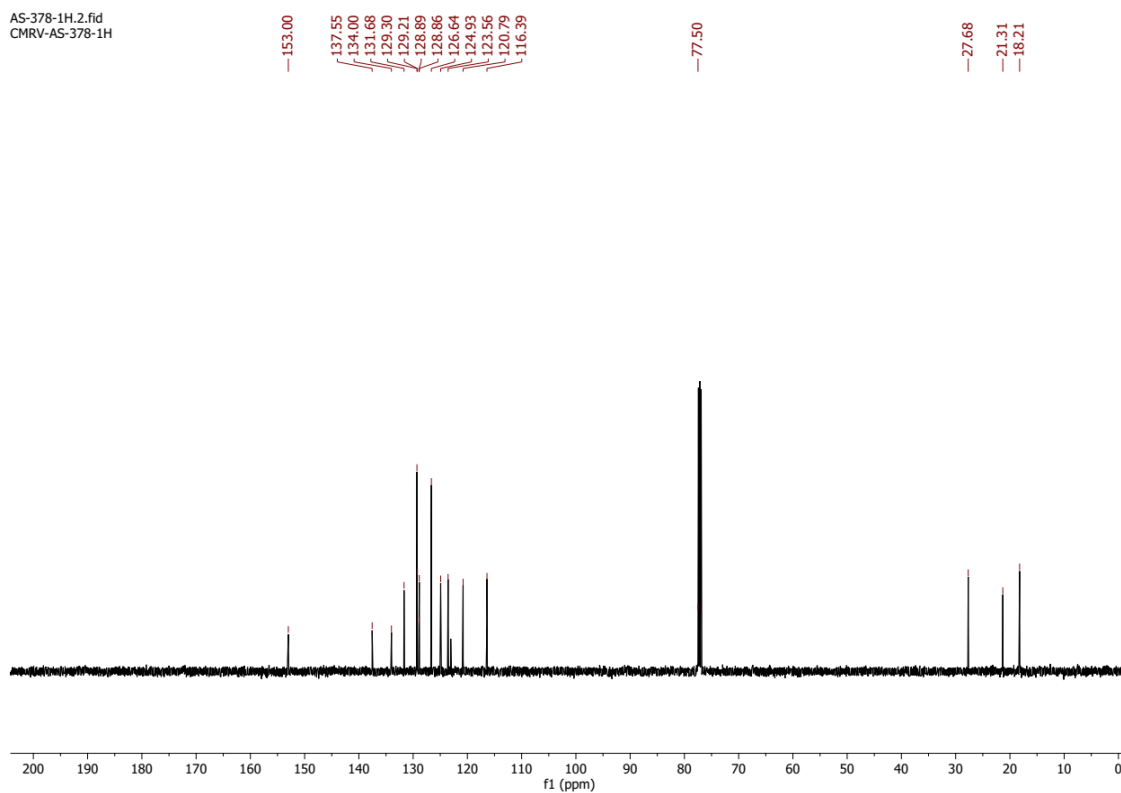

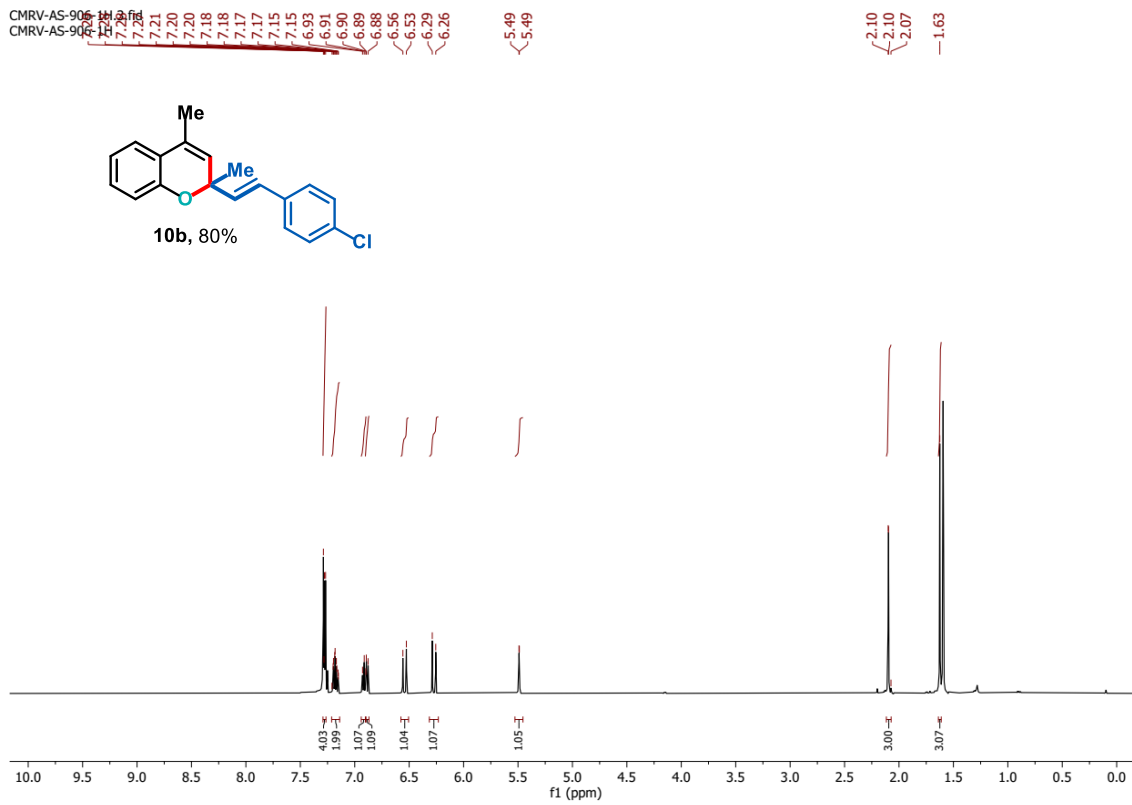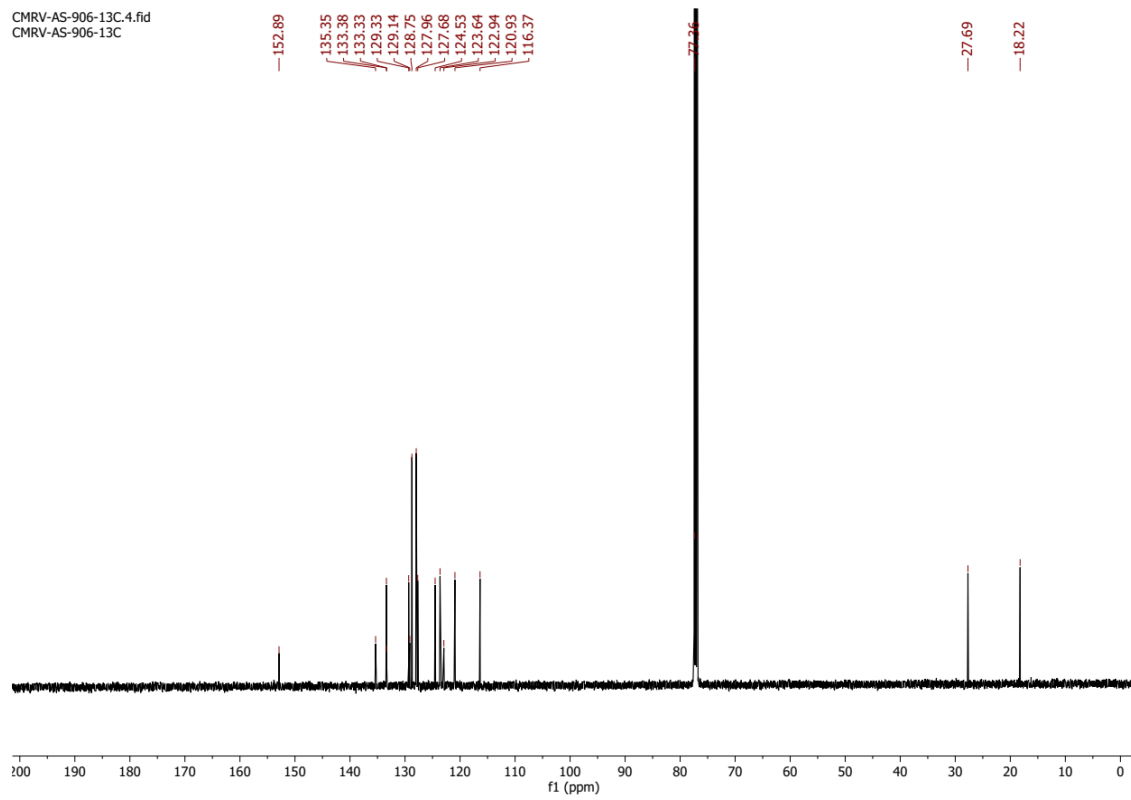



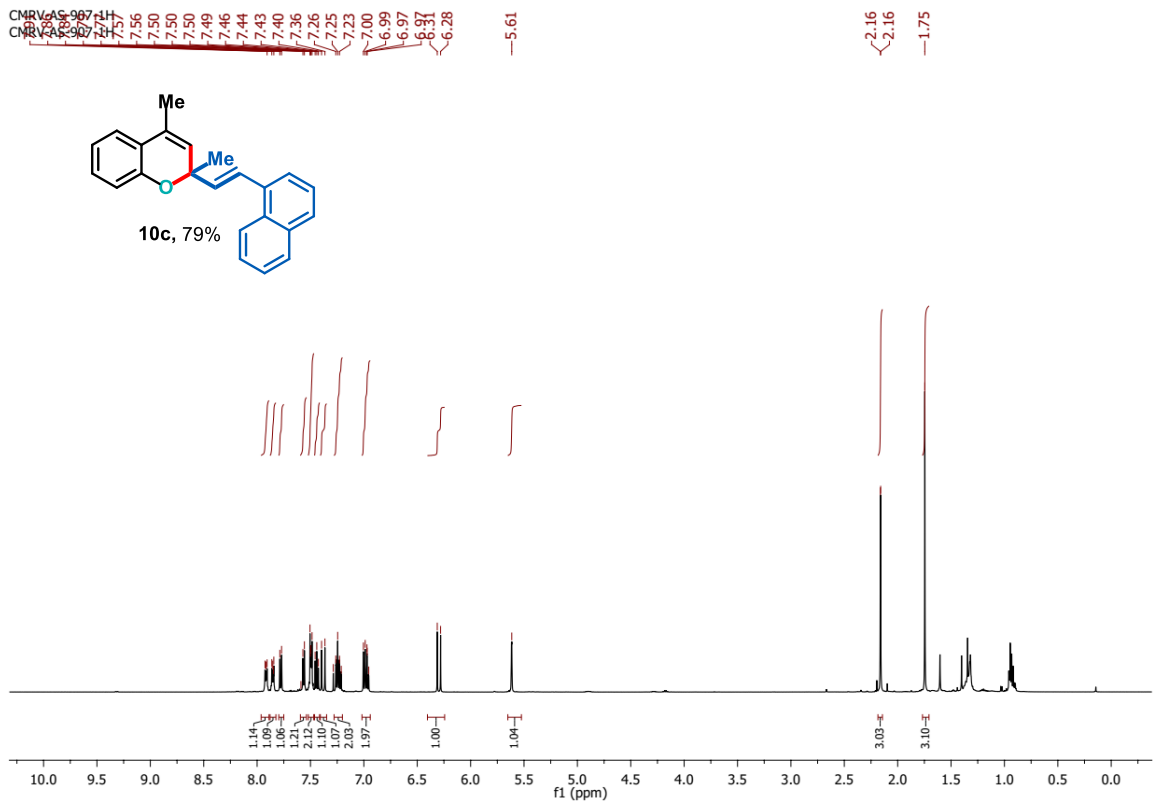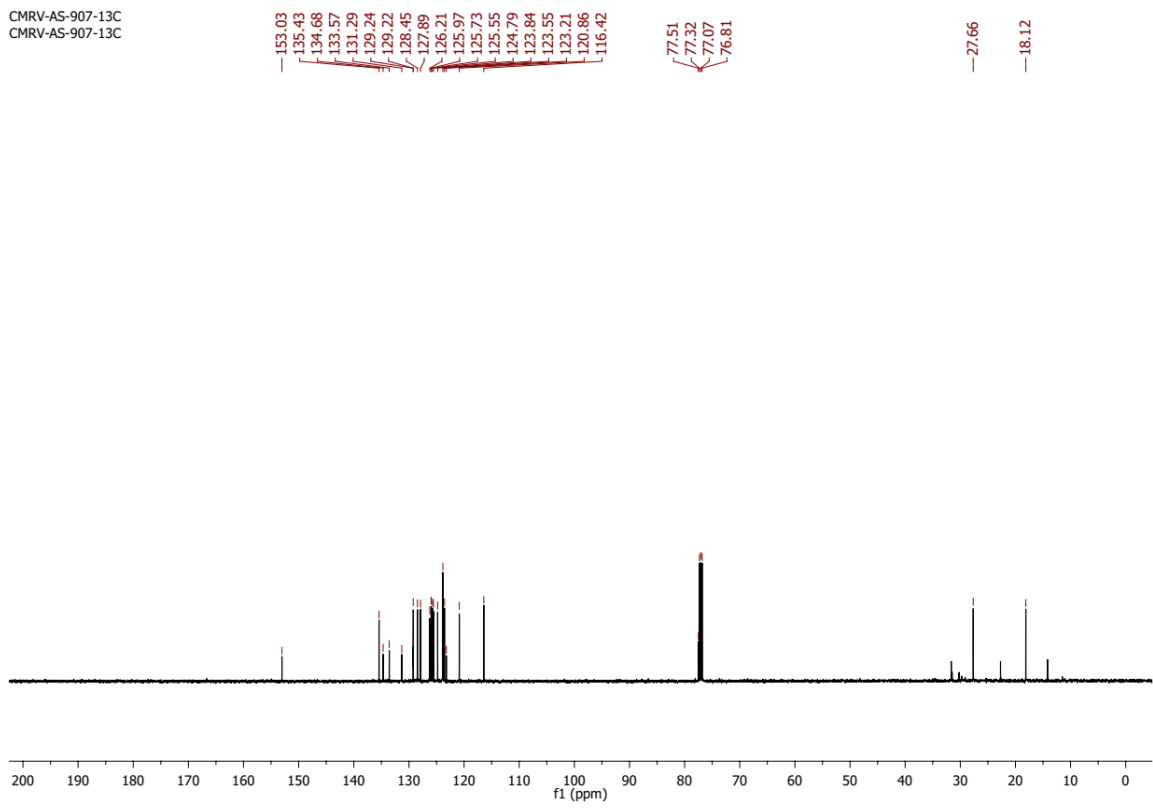

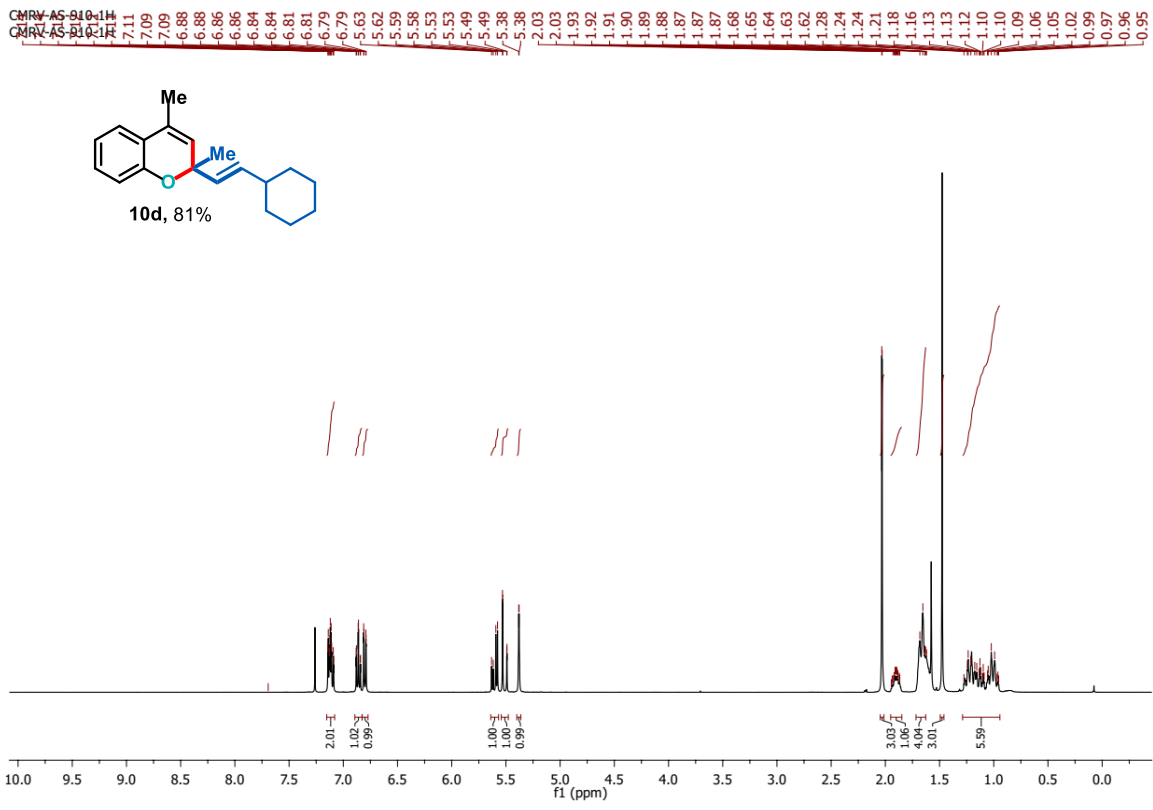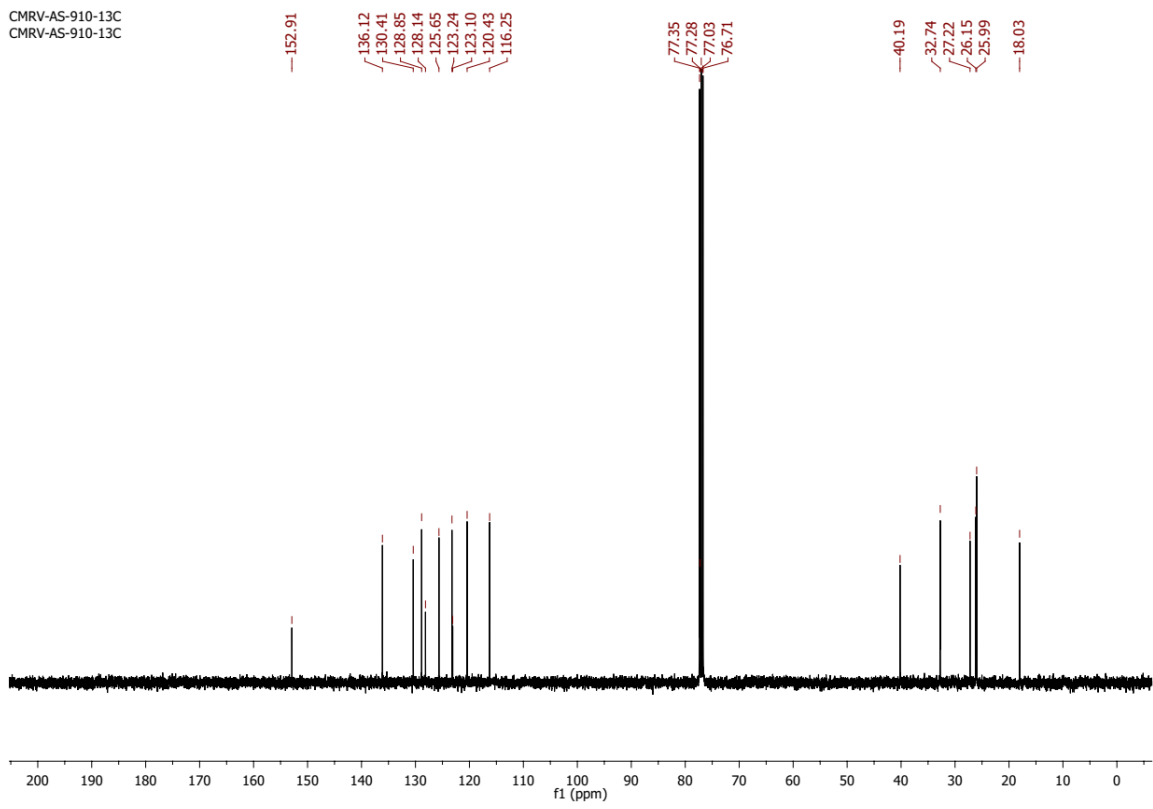

CMRV-AS-911-13C  
7.38  
7.36  
7.31  
7.29  
7.27  
7.24  
7.22  
7.17  
7.15  
7.03  
7.01  
6.96  
6.94  
6.84  
6.82  
6.80  
6.70  
6.66  
6.38  
5.69

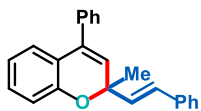

10e, 83%

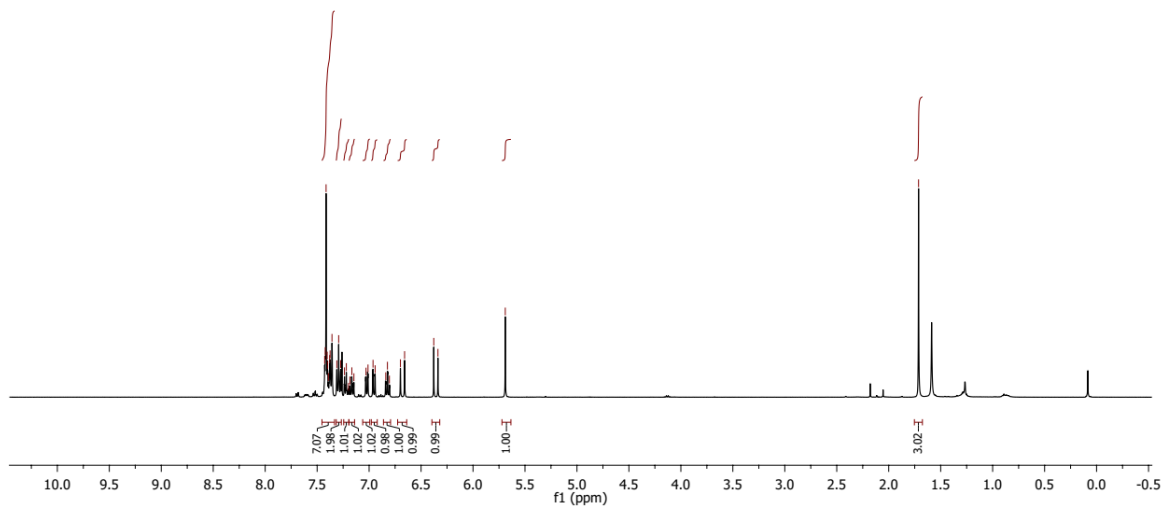

CMRV-AS-911-13C  
CMRV-AS-911-13C

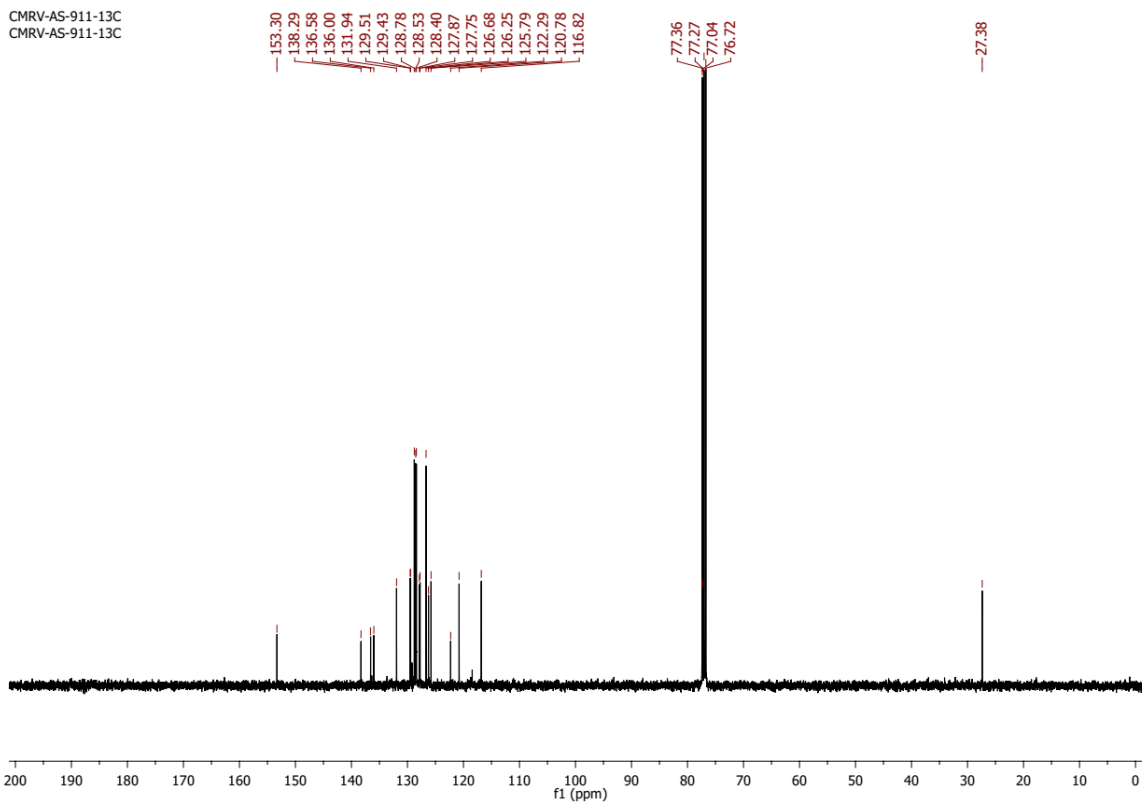

CMRV-AS-909-1H.fid  
 CMRV-AS-909-1H

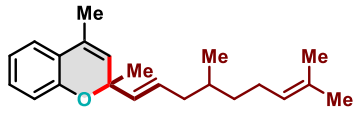

**10f**, 78%, dr = 1:1  
**Citronellal**

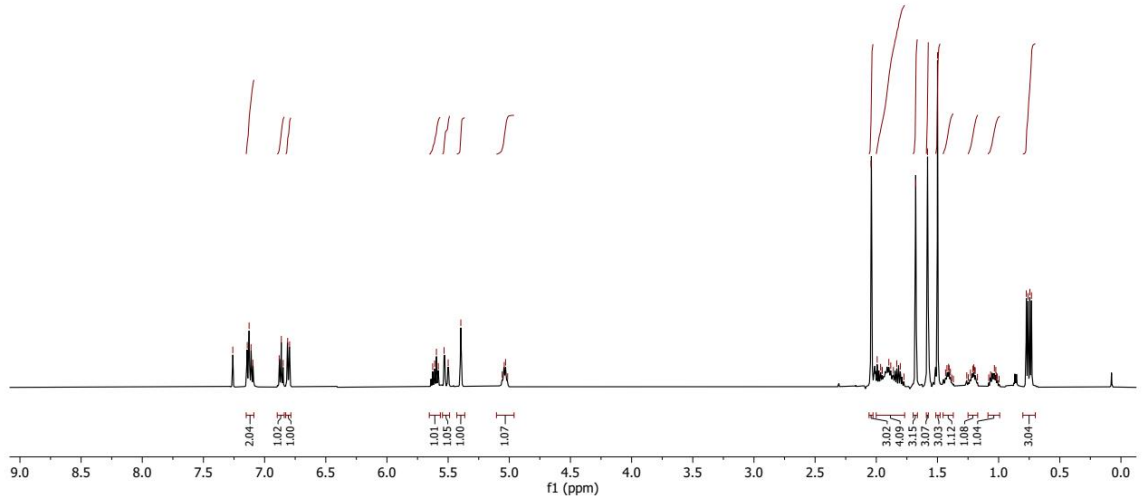

CMRV-AS-909-13C.2.fid  
 CMRV-AS-909-13C

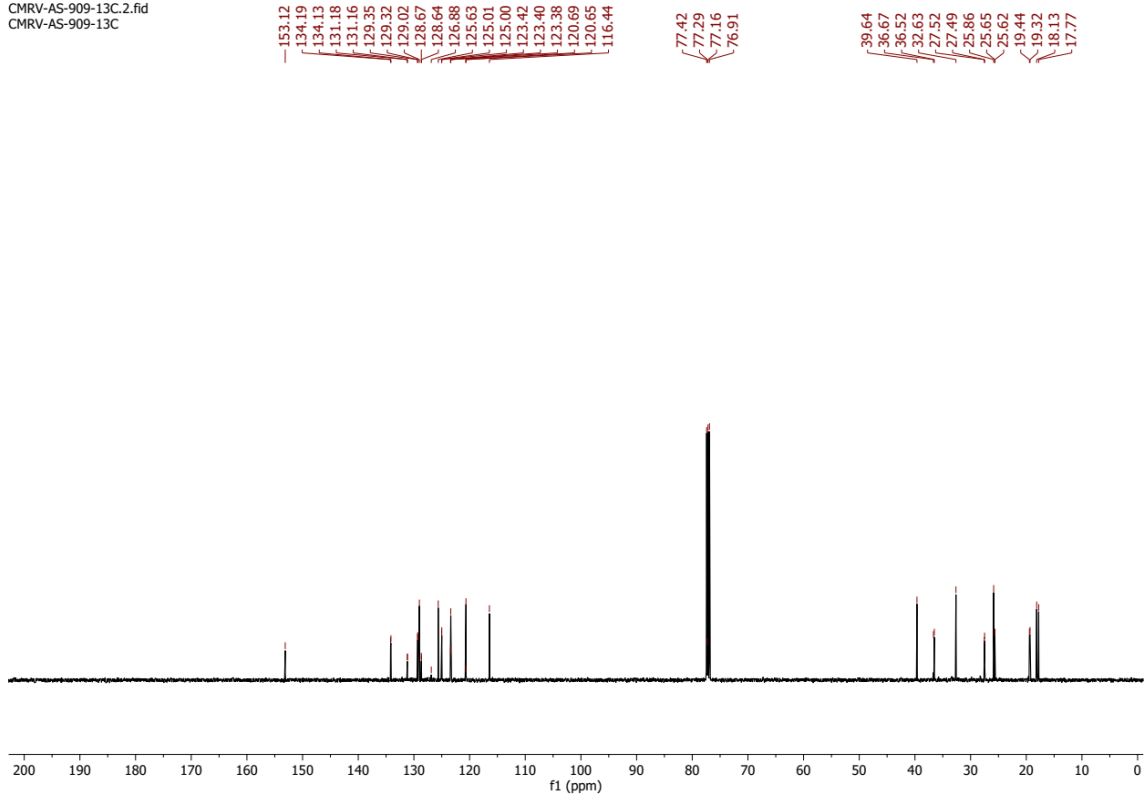

CMTRV-AS-908-13C  
 CMTRV-AS-908-13C  
 CMTRV-AS-908-13C

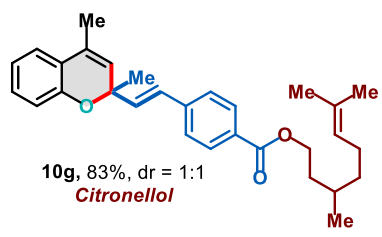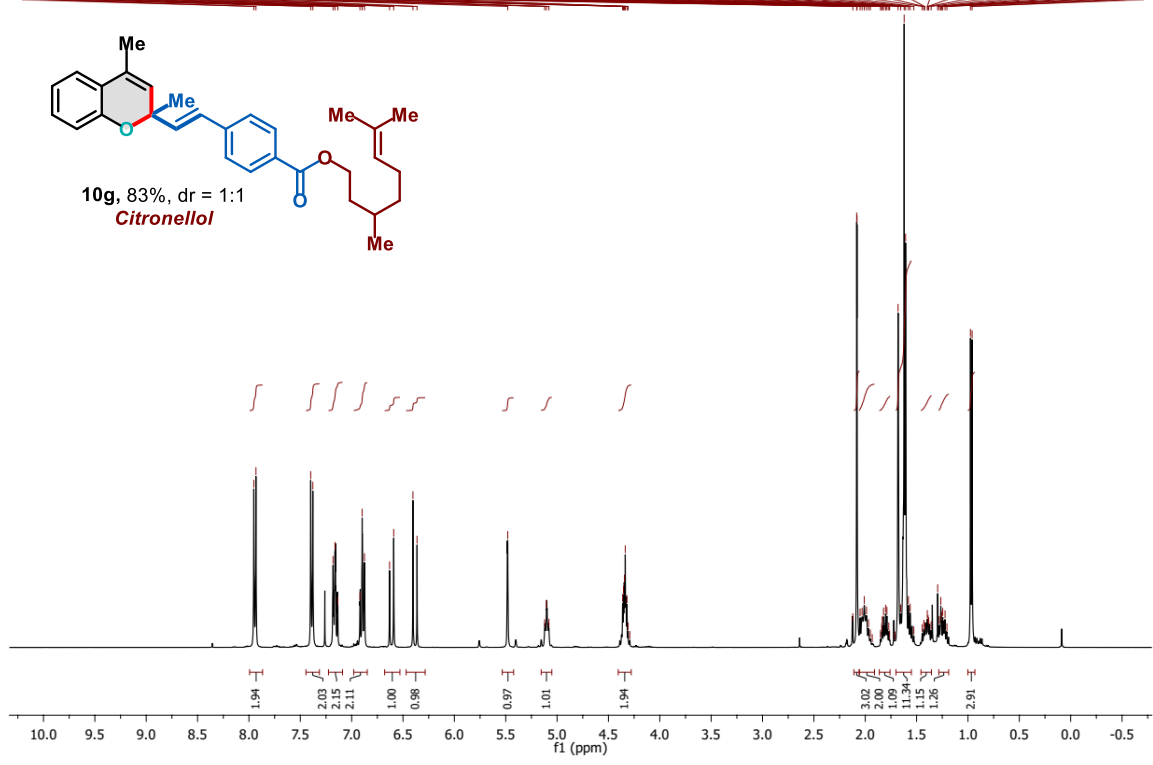

CMTRV-AS-908-13C  
 CMTRV-AS-908-13C

Chemical shift values (ppm): 166.46, 152.74, 141.16, 135.15, 131.40, 129.79, 129.37, 129.26, 129.13, 127.78, 126.47, 124.58, 124.20, 123.54, 122.76, 120.86, 116.24, 77.37, 77.26, 77.05, 76.73, 63.50, 37.00, 35.51, 29.58, 27.57, 25.74, 25.41, 19.53, 18.09, 17.69.

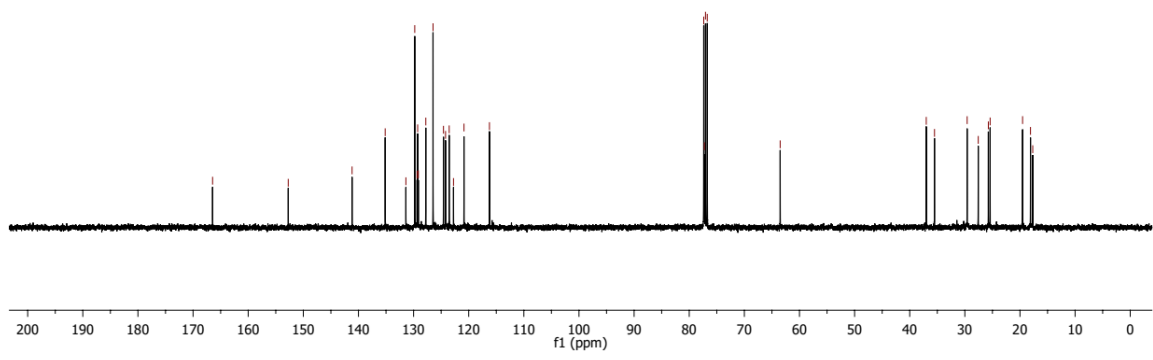

cmrv-as-977-1h-RE  
cmrv-as-977-1h-RE

7.29  
7.17  
7.15  
7.13  
7.12  
7.11  
7.11  
7.09  
7.07  
6.90  
6.88  
6.87  
6.86  
5.64  
5.63  
5.61  
5.60  
5.58  
5.50  
5.46  
5.44

2.34  
2.04  
2.01  
2.00  
1.98  
1.97  
1.33  
1.32  
1.30  
1.29  
1.27  
1.26  
1.24  
1.18  
1.16  
1.088  
0.87  
0.86

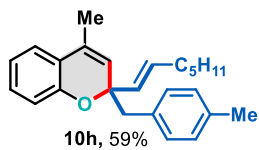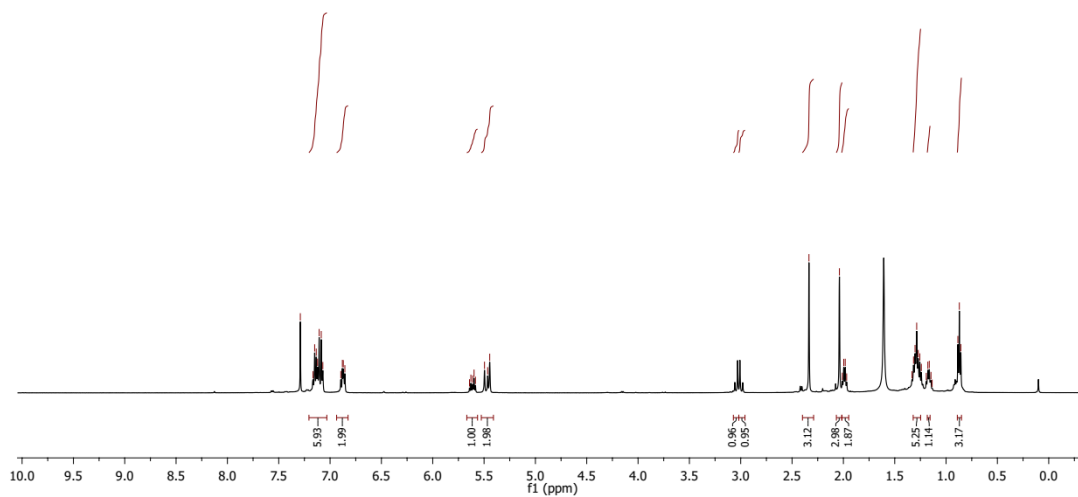

CMRV-AS-948-13C  
CMRV-AS-948-13C

152.95  
137.22  
134.11  
131.59  
129.15  
129.02  
128.48  
126.42  
124.29  
123.37  
122.73  
120.40  
116.14

80.35  
77.34  
76.70  
76.62

49.22

24.43  
24.38  
24.22  
21.16  
18.15

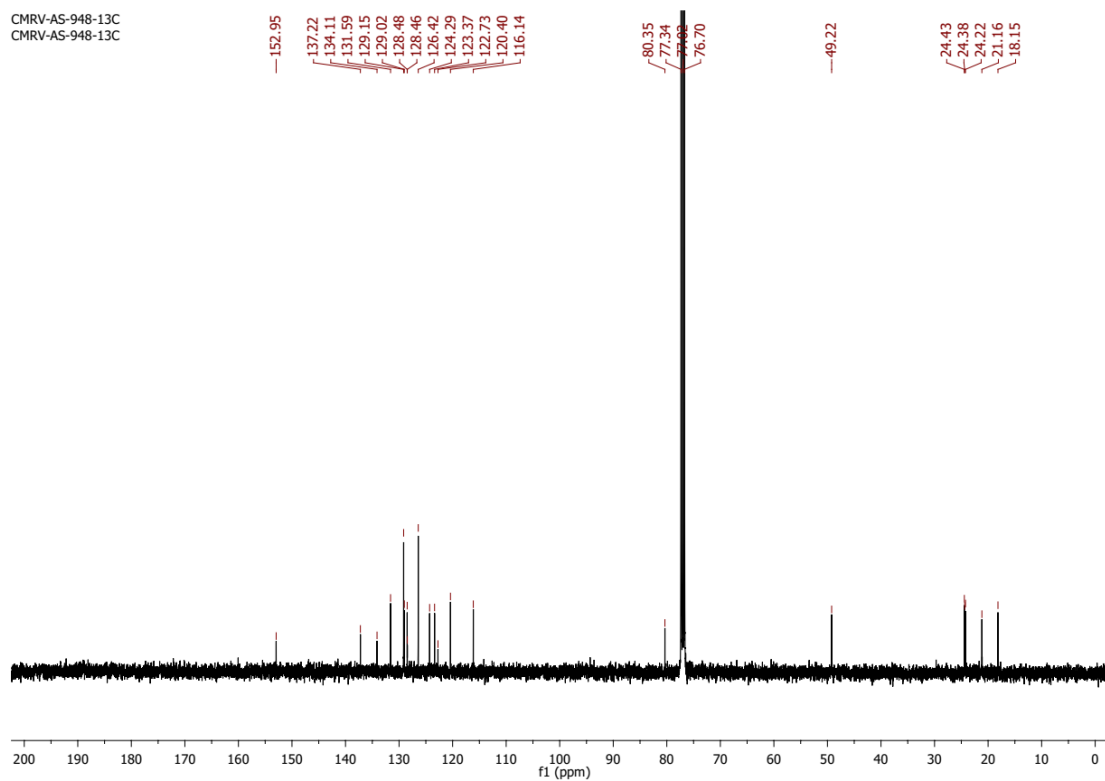

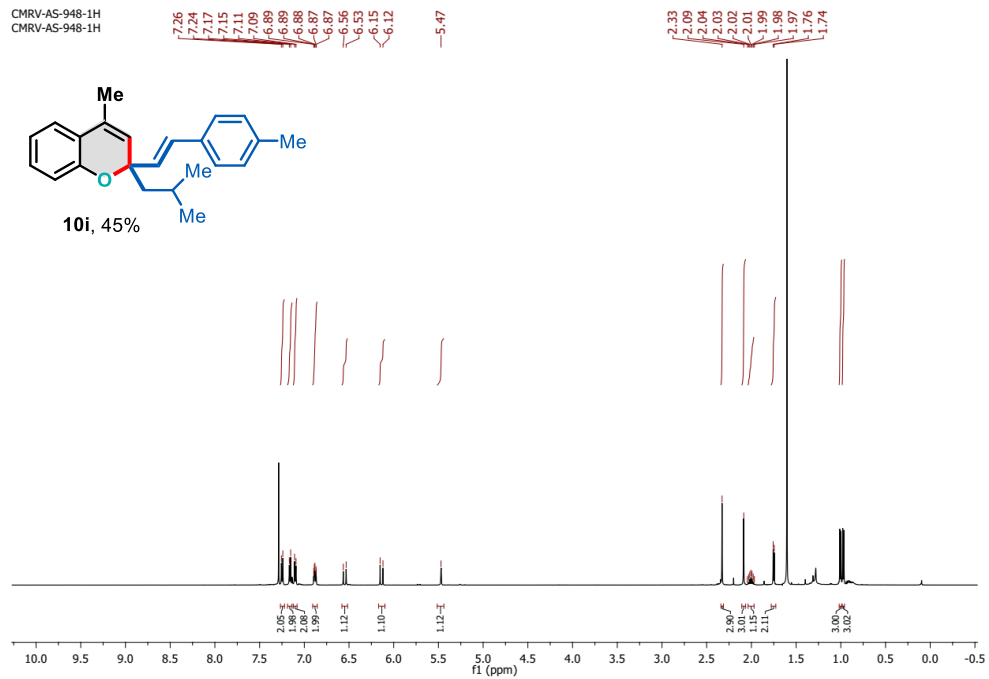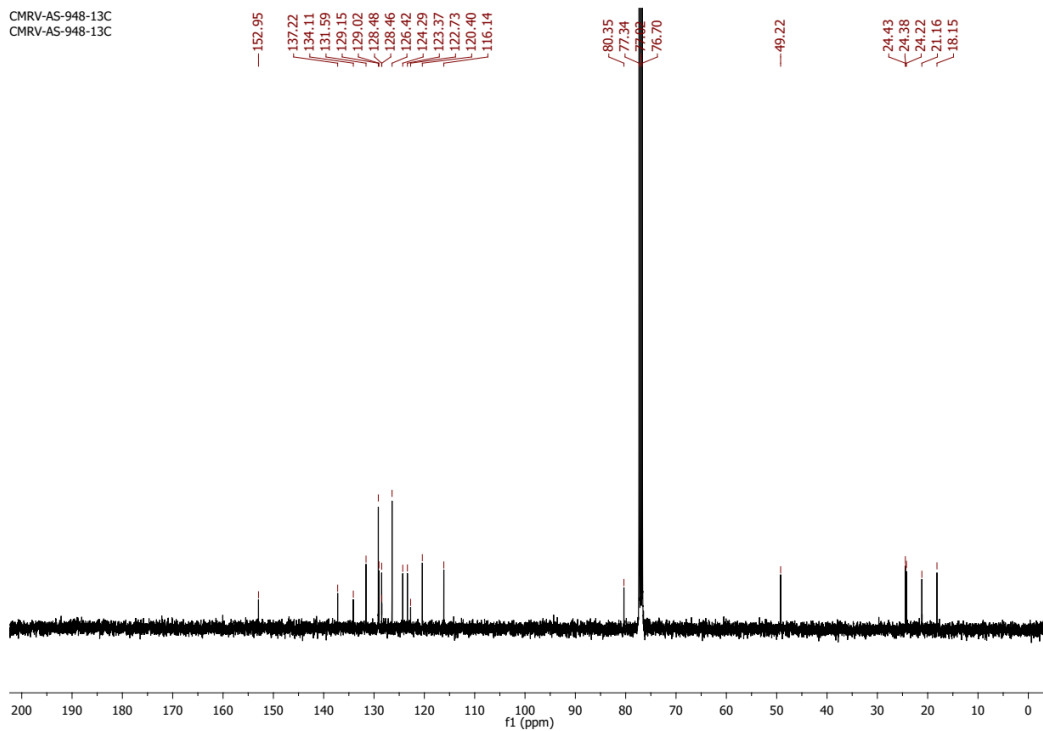

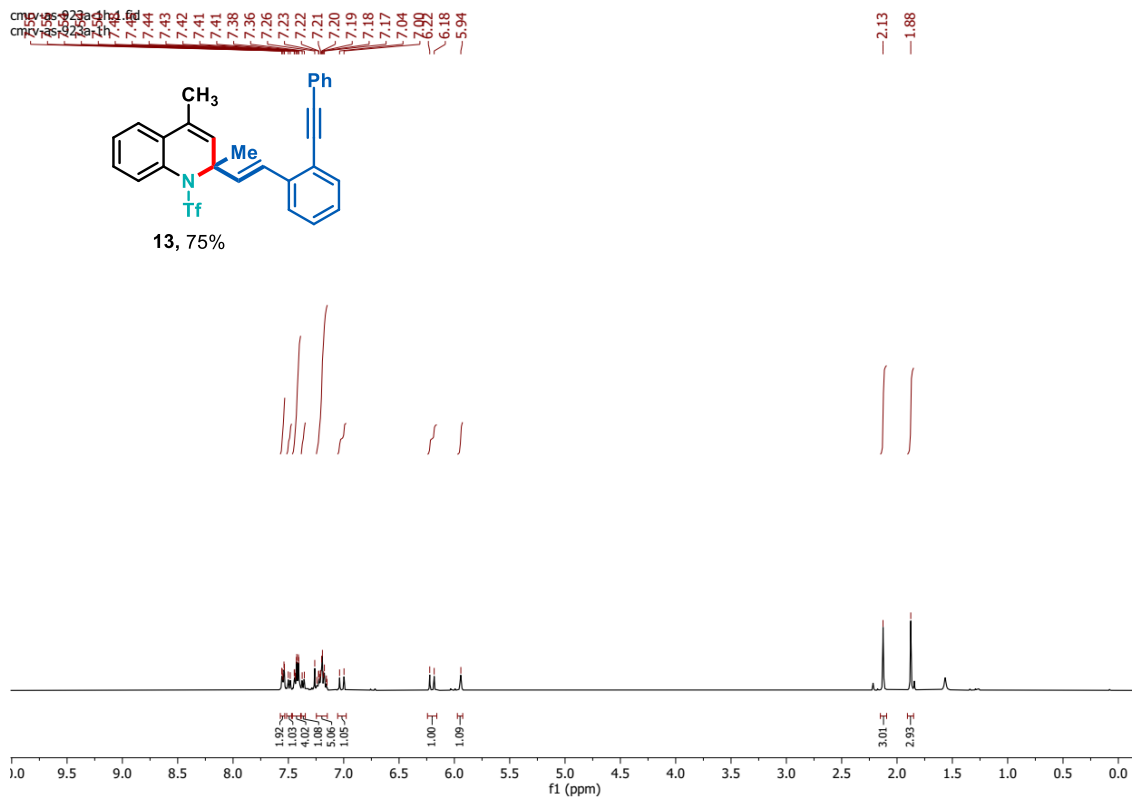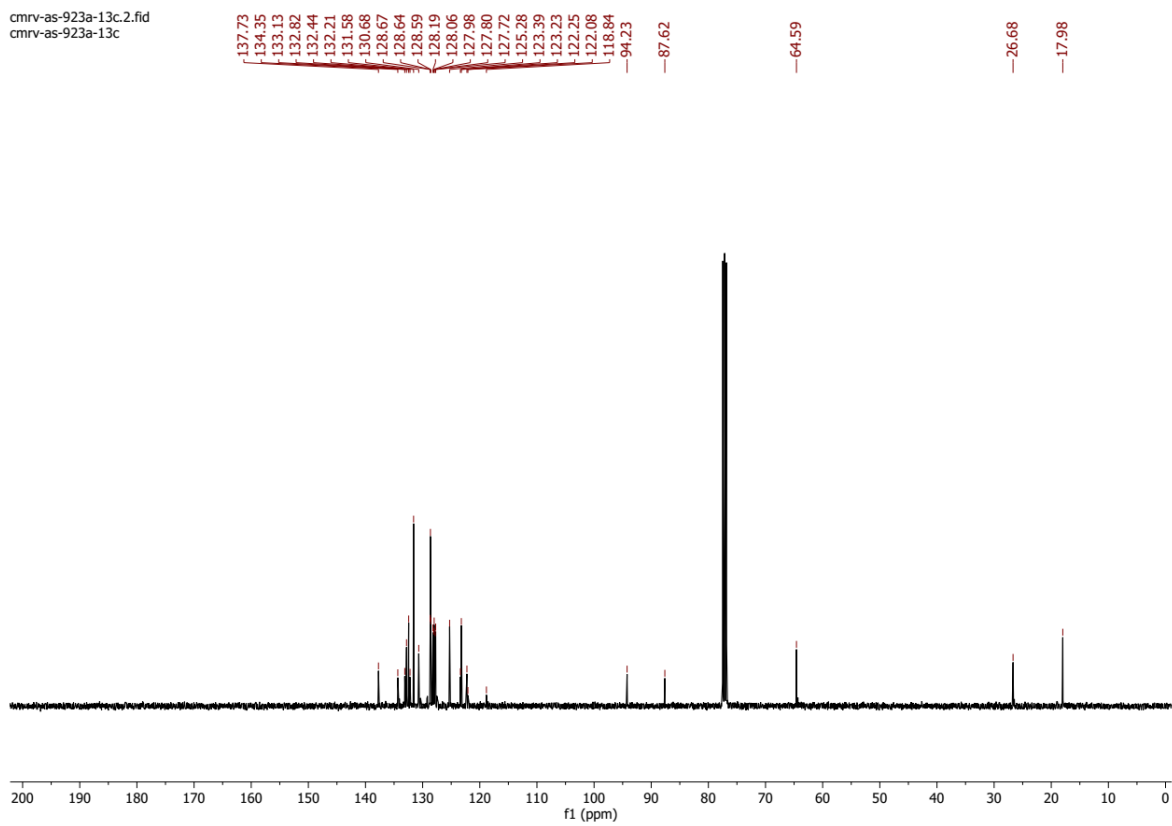



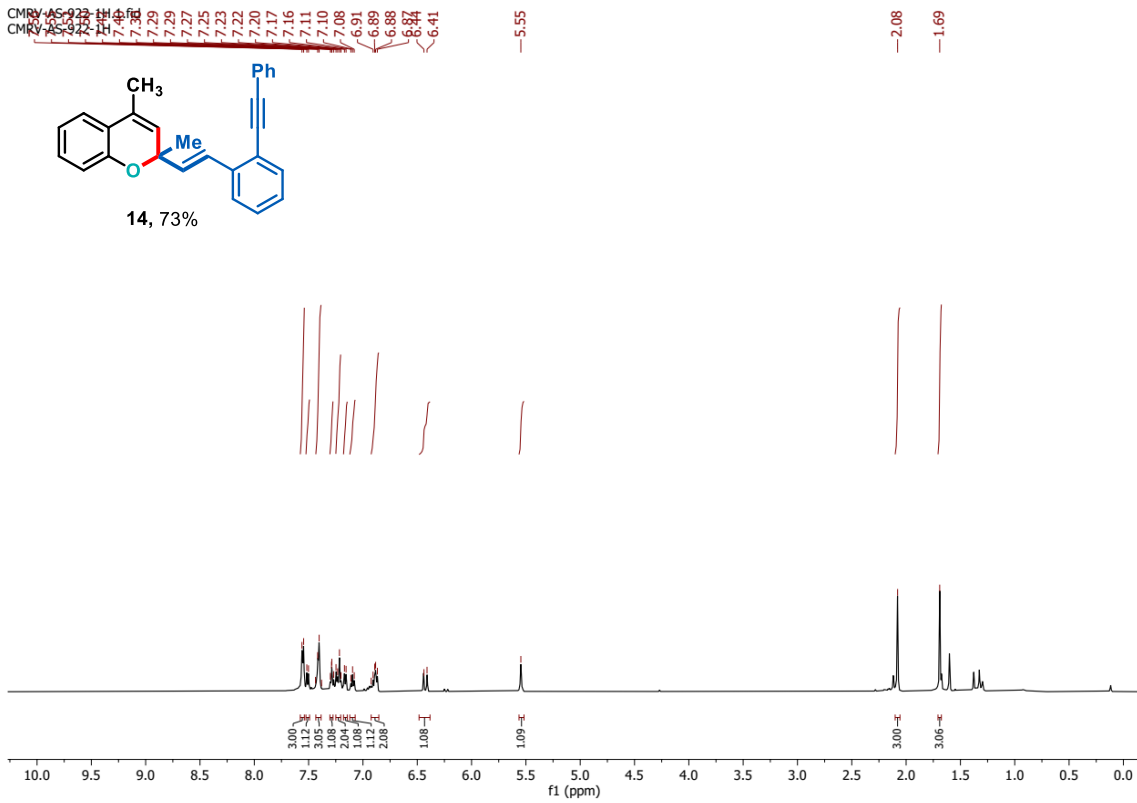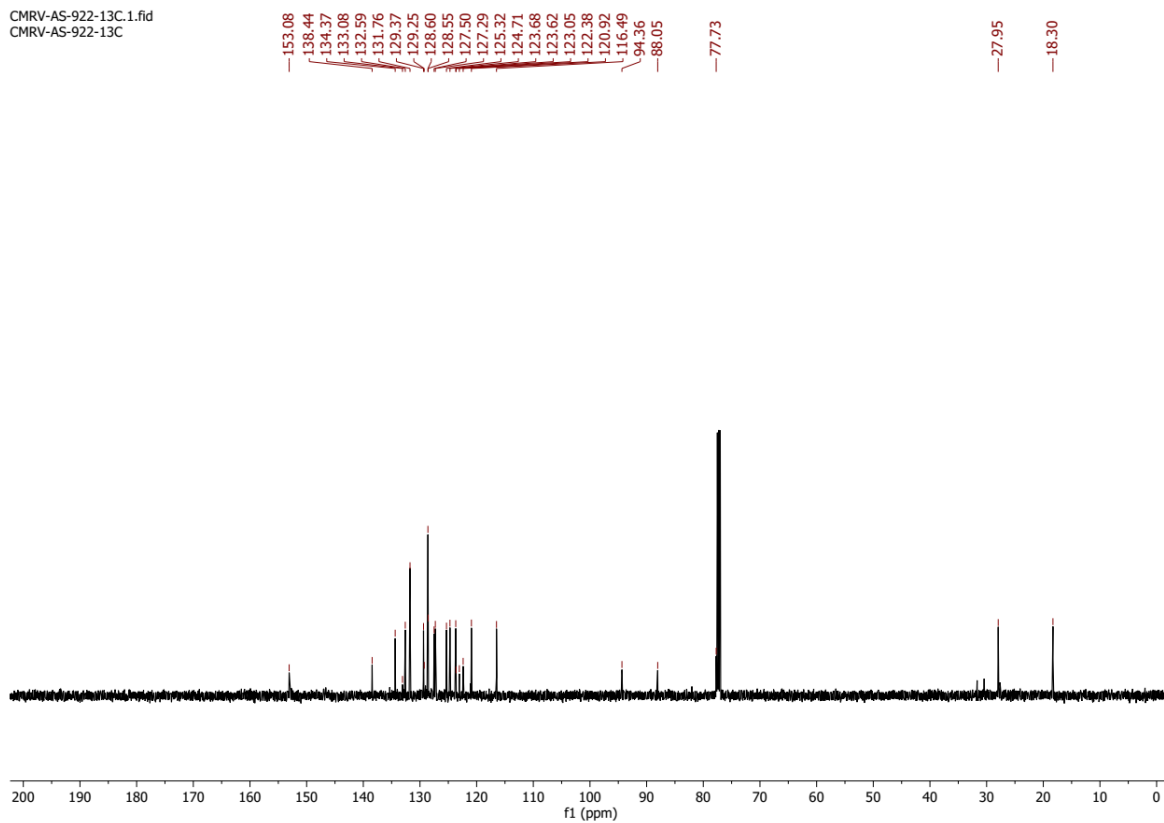

Supplement: d1sc06097j1.pdf [file d1sc06097j1.pdf]
